# Supplementary material for: Wwc2 Is a Novel Cell Division Regulator During Preimplantation Mouse Embryo Lineage Formation and Oogenesis
Source: PubMed Central journal article supplement (PMC7527741; doi:10.3389/fcell.2020.00857), 2020-09-17
Supplement: Data_Sheet_1.pdf [file Data_Sheet_1.pdf]

## **SUPPLEMENTARY MATERIAL**

***Wwc2* is a novel cell division regulator during preimplantation mouse embryo lineage formation and oogenesis.**

Virnicchi *et al.*, 2020

INC.

A) SUPPLEMENTARY FIGURES & LEGENDS: **FIG. S1 – FIG. S15**

B) SUPPLEMENTARY METHODS TABLES: **SM1 – SM6**

C) SUPPLEMENTARY TABLES (individual embryo cell counts & oocyte phenotypes + statistics): **ST1 – ST26**

**A) SUPPLEMENTARY FIGURES & LEGENDS: FIG. S1 – FIG. S15**

***Wwc2* is a novel cell division regulator during preimplantation mouse embryo lineage formation and oogenesis.**

Virnicchi *et al.*, 2020

a)

Mouse WWC2 & KIBRA protein sequence alignment (amino acid conservation 48.1%)

Table showing mouse\_Wwc2 and mouse\_Kibra protein sequence alignment with amino acid conservation percentages. Columns include sequence, residue numbers, and conservation scores.

Corresponding WWC2 amino acids encoded by codons recognised by Wwc2-specific siRNA

Corresponding KIBRA amino acids encoded by codons recognised by Kibra-specific dsRNA

Corresponding WWC2 amino acids encoded by codons recognised by Wwc2-specific dsRNA

Corresponding KIBRA amino acids encoded by codons recognised by Kibra-specific siRNA

b)

Mouse Wwc2 & Kibra partial cDNA alignment (Kibra dsRNA region)

Table showing mouse\_Wwc2 and mouse\_Kibra partial cDNA alignment for the Kibra dsRNA region. Includes sequence, residue numbers, and conservation scores.

Complementary Kibra cDNA sequence targeted by Kibra dsRNA

d)

Mouse Wwc2 & Kibra partial cDNA alignment (Wwc2 siRNA region)

Table showing mouse\_Wwc2 and mouse\_Kibra partial cDNA alignment for the Wwc2 siRNA region. Includes sequence, residue numbers, and conservation scores.

Complementary Wwc2 cDNA sequence targeted by Wwc2 siRNA

e)

Best possible alignment of Wwc2 siRNA against Kibra cDNA

Table showing the best possible alignment of Wwc2 siRNA against Kibra cDNA. Columns include siRNA sequence, Kibra cDNA sequence, and alignment scores.

(21/25 nucleotides with x8 mismatches)

c)

Mouse Wwc2 & Kibra partial cDNA alignment (Wwc2 dsRNA region)

Table showing mouse\_Wwc2 and mouse\_Kibra partial cDNA alignment for the Wwc2 dsRNA region. Includes sequence, residue numbers, and conservation scores.

Complementary Wwc2 cDNA sequence targeted by Wwc2 dsRNA

f)

Mouse Wwc2 & Kibra partial cDNA alignment (Kibra siRNA region)

Table showing mouse\_Wwc2 and mouse\_Kibra partial cDNA alignment for the Kibra siRNA region. Includes sequence, residue numbers, and conservation scores.

Complementary Kibra cDNA sequence targeted by Kibra siRNA

**Supplementary figure S1: Annotated amino acid and cDNA sequence alignments for mouse WWC2/*Wwc2* & KIBRA/*Kibra* detailing regions targeted by dsRNA and siRNA constructs.** **a)** Full-length amino acid sequence of mouse WWC2 and KIBRA proteins; purple denotes the region encoded by codons targeted by the *Kibra*-specific dsRNA, orange that targeted by the *Wwc2*-specific siRNA, turquoise targeted by the *Wwc2*-specific dsRNA and green targeted by *Kibra*-specific siRNA. **b)** Partial cDNA sequence alignment of the *Kibra* gene region coding sequence targeted by the *Kibra*-specific dsRNA (highlighted in purple), against the equivalent/aligned region in *Wwc2* cDNA. **c)** Partial cDNA sequence alignment of the region of the *Wwc2* gene coding sequence targeted by the *Wwc2*-specific dsRNA (highlighted in turquoise), against the equivalent/aligned region in *Kibra* cDNA. **d)** Partial cDNA sequence alignment of the *Wwc2* gene region sequence targeted by the *Wwc2*-specific siRNA (highlighted in orange), against the equivalent/aligned region in *Kibra* cDNA. **e)** The best result of aligning the used *Wwc2*-specific siRNA sequence against the mouse *Kibra* cDNA sequence (highlighted in red); note the best possible match of the *Wwc2*-specific siRNA sequence to the *Kibra* cDNA sequence is a 21 nucleotide stretch that contains eight evenly spread base-pair mis-matches, thus, minimising the chance of off-target recognition of *Kibra* transcripts by the *Wwc2*-designed siRNA. **f)** Partial cDNA sequence alignment of the *Kibra* gene region sequence targeted by the *Kibra*-specific siRNA (highlighted in green), against the equivalent/aligned region in *Kibra* cDNA. All alignments were conducted using default setting of the online Clustal-Ω multiple sequence alignment tool; asterisks (\*) denote perfectly aligned and identical amino acids/DNA base-pairs, whereas colons (:) detail aligned conservative amino acid substitutions.

**a)***Wwc2* or Control siRNA  
(+RDBs)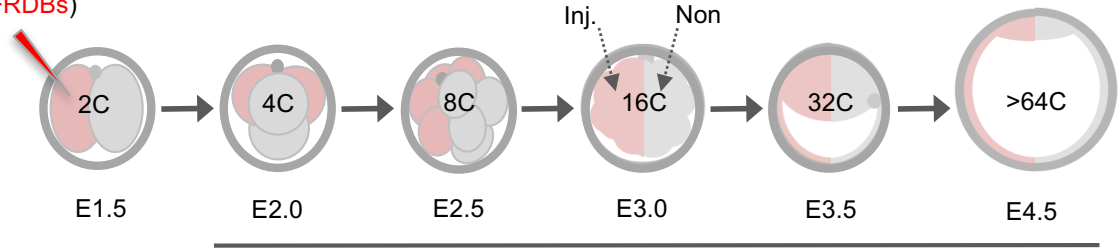

Assay cell number and blastomere clonal origin

**b)**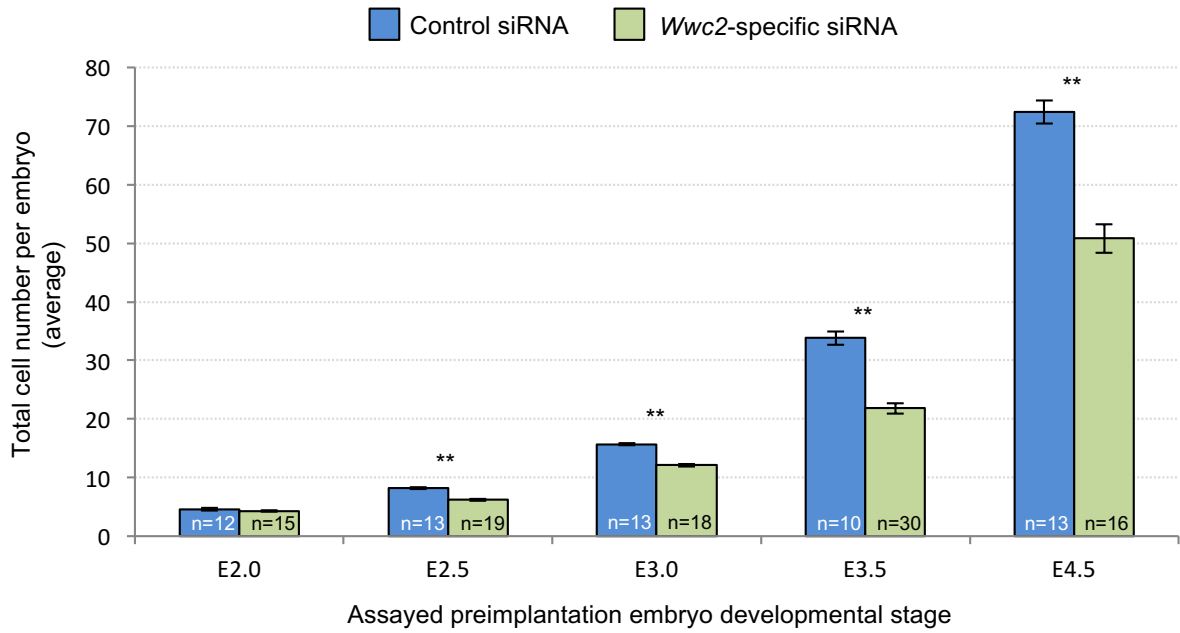**c)**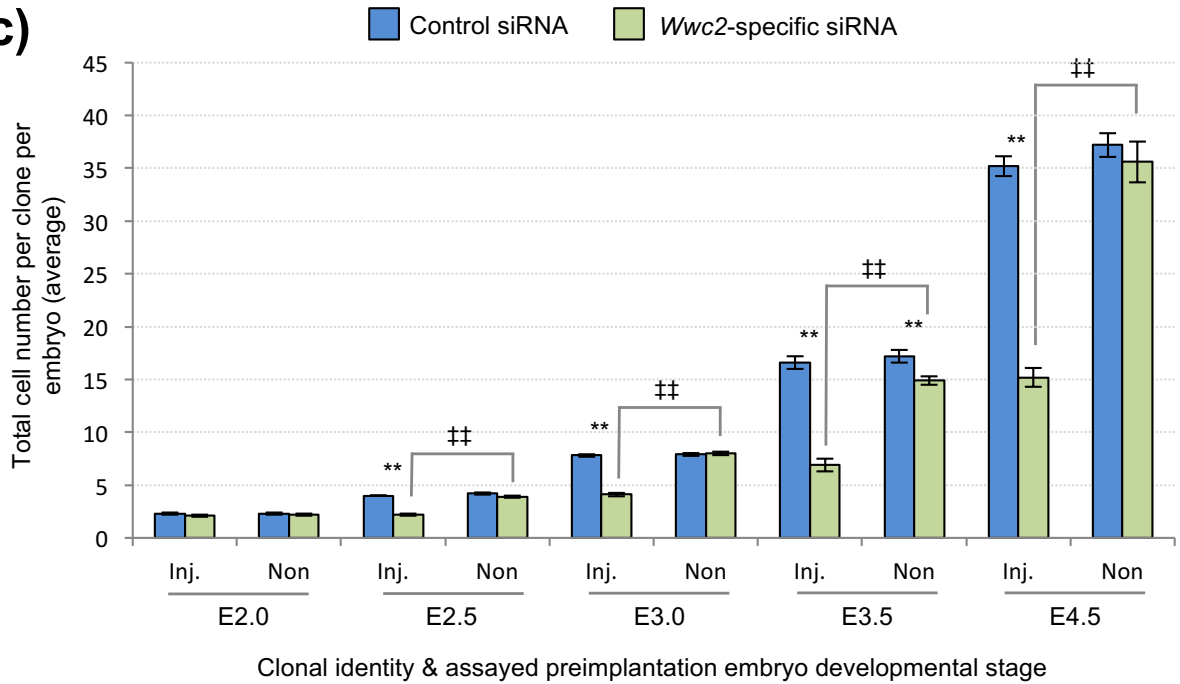

**Supplementary figure S2: Preimplantation embryo *Wwc2* KD associated cell division phenotypes are cell autonomous. a)** Experimental strategy for *Wwc2* KD in a marked clone (representing 50% of the embryo) by co-microinjection (in one blastomere of 2-cell stage embryos) of *Wwc2* siRNA and RDBs (fluorescent lineage marker – Inj.) and an assay of clonal contribution (Inj vs. Non) at stated developmental stages (compared to similar control siRNA microinjections). **b)** Average total number of cells per embryo (irrespective of clonal origin), at each developmental stage, from control siRNA (blue bars) and *Wwc2*-specific siRNA microinjected (green bars) embryos. The number of embryos in each experimental group is shown. **c)** As in b) but detailing the clonal contribution of cells (Inj vs. Non) to total embryo cell number in control siRNA (blue bars) or *Wwc2* siRNA (green bars) microinjected embryos. In panels b) & c) chart error bars represent s.e.m. and statistically significant differences (2-tailed students t-test) between the experimental microinjection groups (asterisks) or clones within a group (double crosses) are highlighted with statistical confidence intervals of  $p < 0.05$  and  $p < 0.005$  (denoted by one or two significance markers, respectively). Supplementary tables ST7-ST11 summarise statistical analysis and individual embryo data.

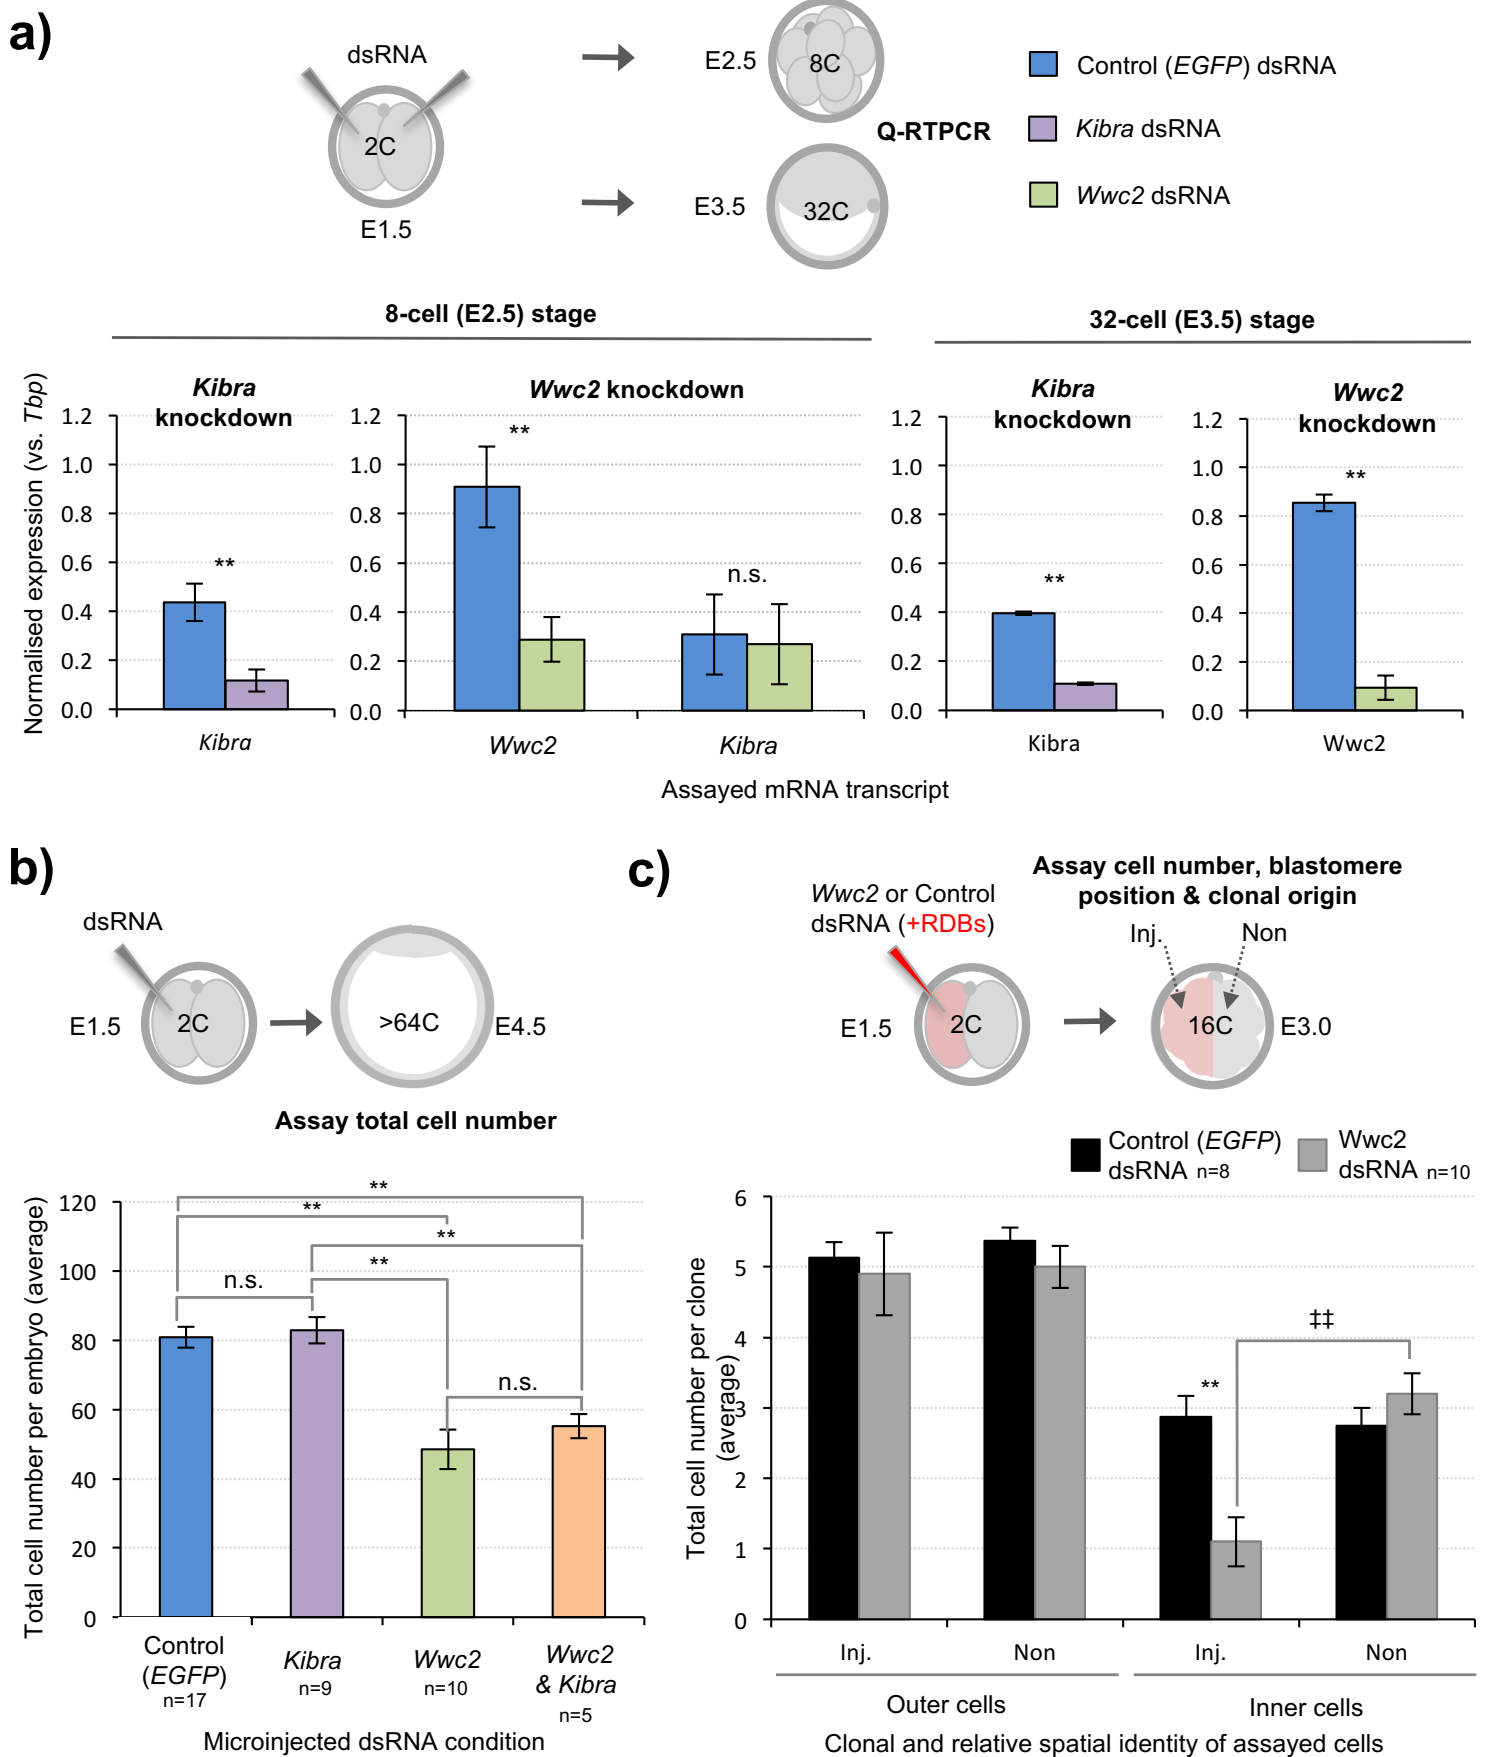

**Fig. S3**

**Supplementary figure S3: dsRNA mediated WWC-domain containing gene (*Kibra* & *Wwc2*) KD in preimplantation mouse embryos is associated (*Wwc2*) reduced cell number. a)** Experimental schema of *Kibra* and *Wwc2* specific dsRNA (plus *EGFP* negative control) microinjection mediated global embryo KD, followed by culture to either 8-cell or 32-cell stages and Q-RT-PCR analysis (upper). Normalised expression of either *Kibra* or *Wwc2* derived mRNAs after stated dsRNA microinjection, at stated developmental stages (lower; error bars represent s.e.m., n=3 and \*\* denotes  $p < 0.005$  in 2-tailed student t-test, n.s. denotes lack of significance). **b)** Experimental schema describing clonal *Kibra*, *Wwc2* or *Kibra+Wwc2* KD (microinjection of one cell at the 2-cell stage) and total fixed embryo cell number assay at the late blastocyst (>64-cell) stage (upper). Average total cell number per embryo in each stated dsRNA microinjection group (lower chart). **c)** Experimental strategy to KD *Wwc2* expression (as in b) in marked clones, (*Wwc2* dsRNA and rhodamine conjugated dextran microbeads/RDBs co-microinjection) and assay clonal contribution at the 16-cell stage (upper). Average total cell number per clone (Inj. vs. Non) in *Wwc2* or control dsRNA microinjection groups, as determined by relative position of individual cells within the embryo (encapsulated inside or with a cell contactless domain on outside; lower chart). In panels b) & c) chart error bars represent s.e.m. with indicated 'n' numbers. Highlighted statistically significant differences (2-tailed students t-test) between experimental microinjection groups (asterisks), or clones (Inj. vs. Non) within a group (double crosses), with statistical confidence intervals of  $p < 0.05$  and  $p < 0.005$ , denoted by one or two significance markers, respectively; in panel b) a lack of significant difference between compared groups is marked 'n.s.'. Supplementary tables ST12 & ST13 summarise statistical analysis and individual embryo data.



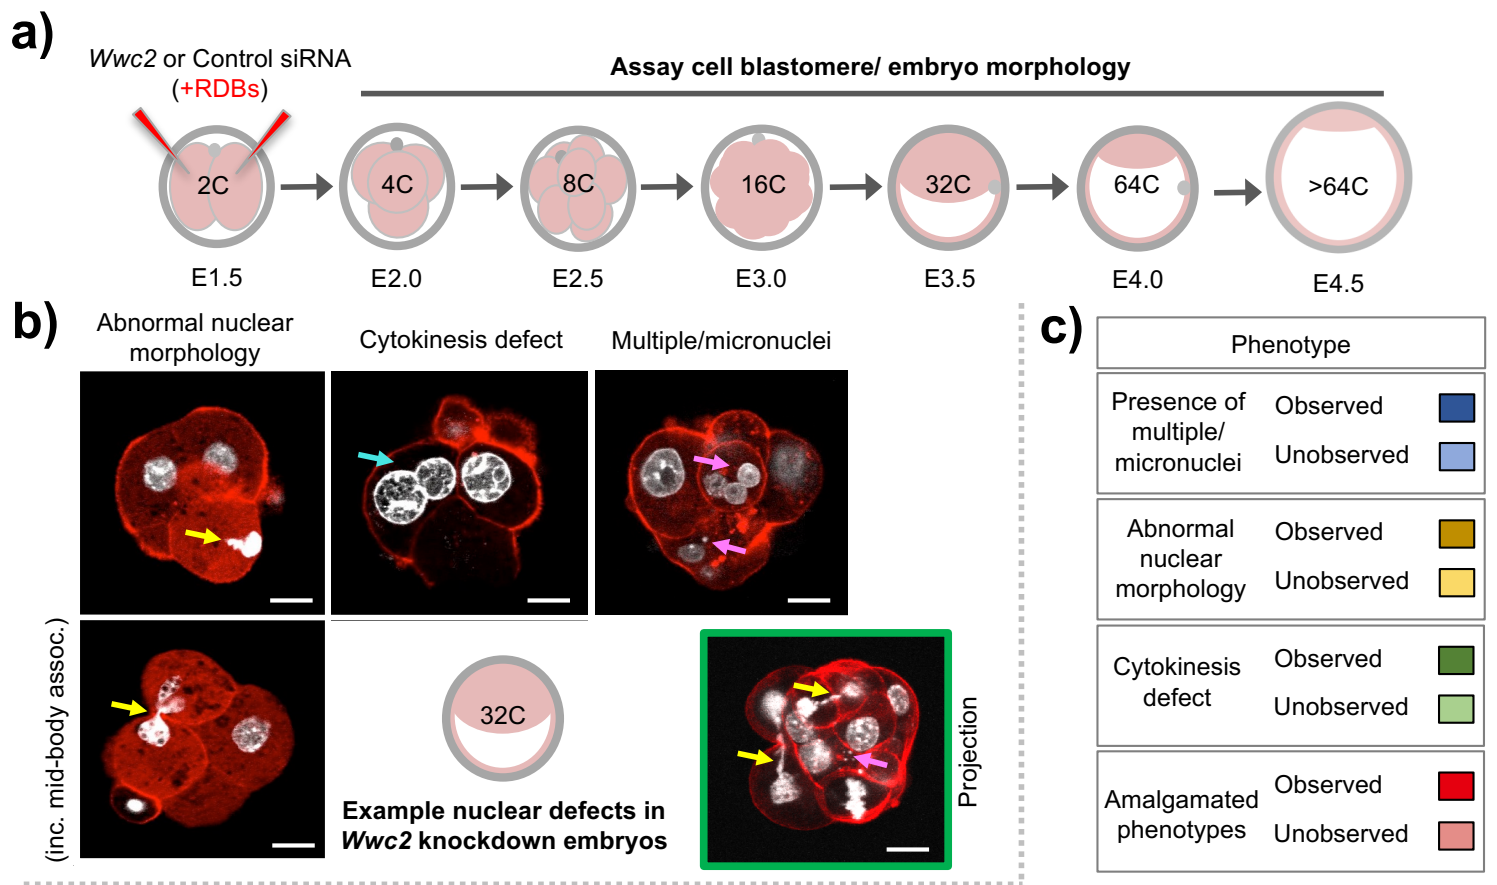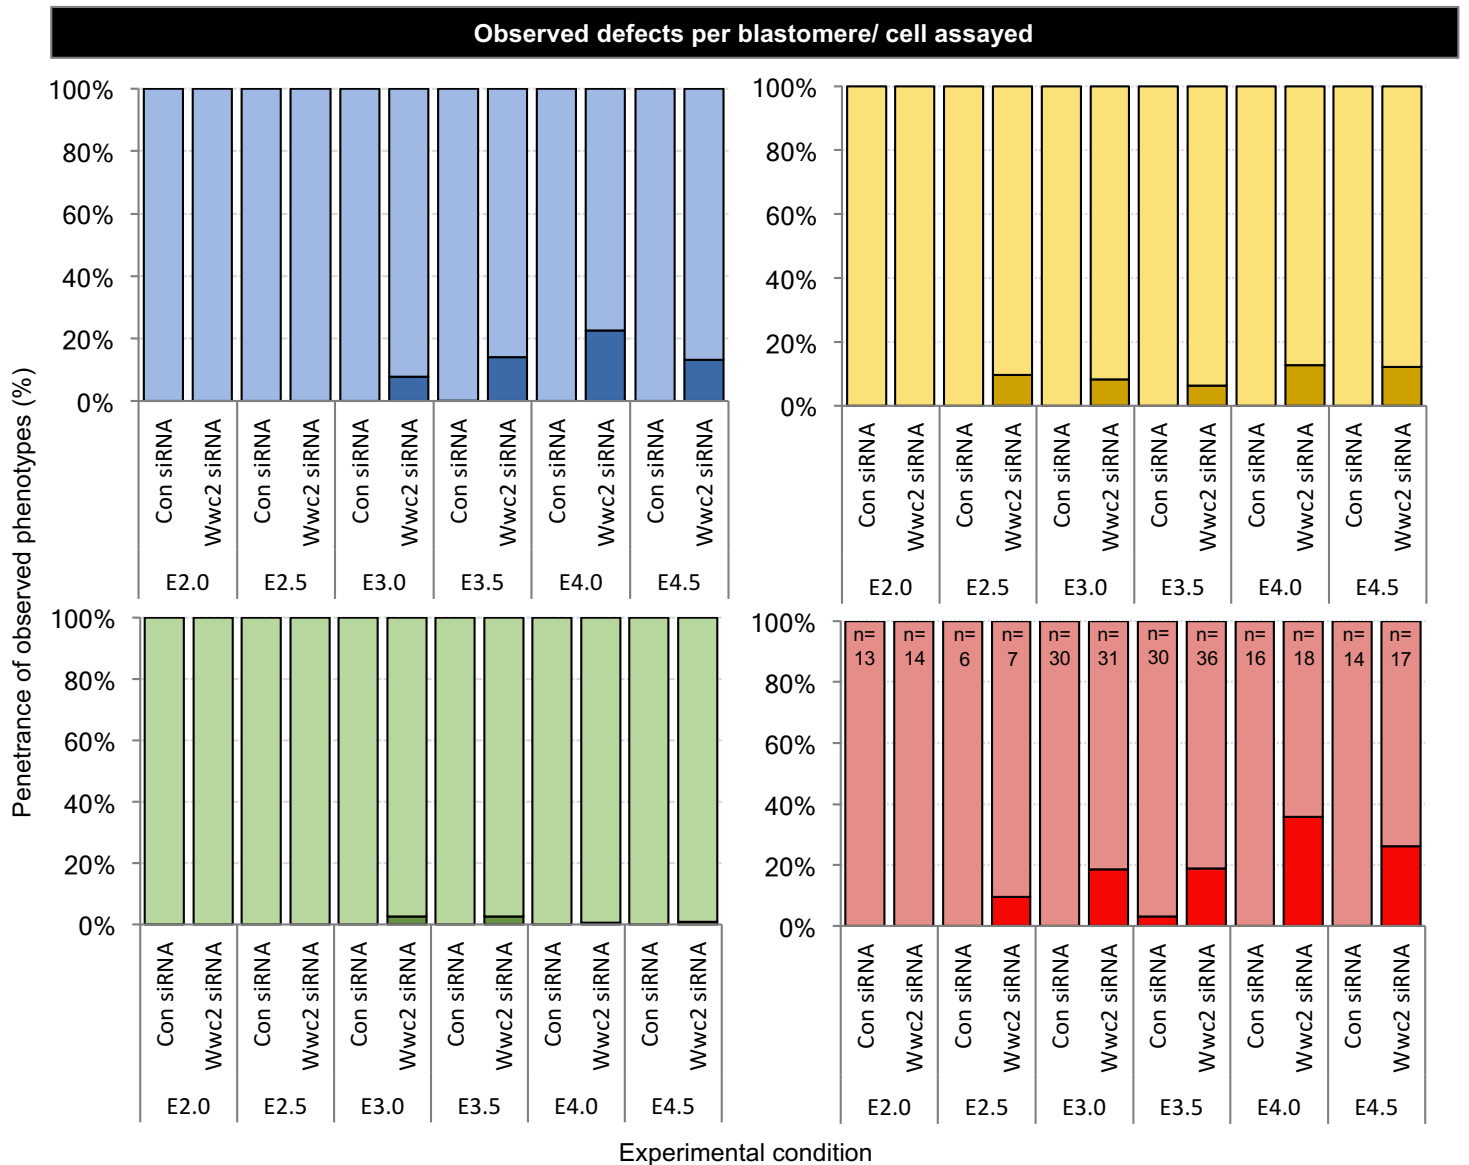

**Fig. S4**

**Supplementary figure S4: Global *Wwc2* KD mediated total embryo cell number deficits are associated with defective cell division morphologies (according to incidence in each assayed blastomere/cell).** **a)** Schematic of experimental design; 2-cell stage embryos microinjected with control or *Wwc2*-specific siRNA, cultured to indicated developmental stages, fixed and assayed for total cell number or the incidence of abnormal cell morphology indicative of defective cell division (determined by DAPI and rhodamine conjugated phalloidin staining - note, data derived from same experiments as those described in Figs. 1 & 2). **b)** Exemplar confocal micrograph z-sections of *Wwc2*-specific siRNA microinjected embryos at the 32-cell stage, illustrating three distinct phenotypic morphological defect categories observed; i. abnormal nuclear morphology (including chromatin mid-body association, highlighted by yellow arrows - left), ii. cytokinesis defects defined by two nuclei per cell (highlighted by blue arrow -centre), iii. presence of multiple (*i.e.* >3, highlighted by pink arrows) nuclei and/or micronuclei per cell (right) and iv. composite of categorised defects highlighted by colour coded arrows in a single embryo confocal z-section projection (green boarder). DAPI (white) and cortical F-actin (red); scale bar = 20  $\mu$ m. **c)** Frequencies of each observed category of phenotypic/ morphological defect (*i.e.* micronuclei; blue, abnormal nuclei; yellow and failed cytokinesis; green) or a combination of at least two or more (red) in each assayed blastomere/cell of control siRNA and *Wwc2*-specific siRNA microinjected embryos, at indicated developmental stages (numbers of embryos in each group highlighted, see amalgamated data - red); data demonstrate defect incidence per assayed blastomere/cell (not in at least one blastomere/cell per embryo, as in Fig. 2). Supplementary tables ST1-ST6 summarise statistical analysis and individual embryo data in each experimental group.

a)

Individual merged z-sections of IVM category exemplar micrographs (Fig.4): **DAPI** &  **$\alpha$ -TUBULIN**

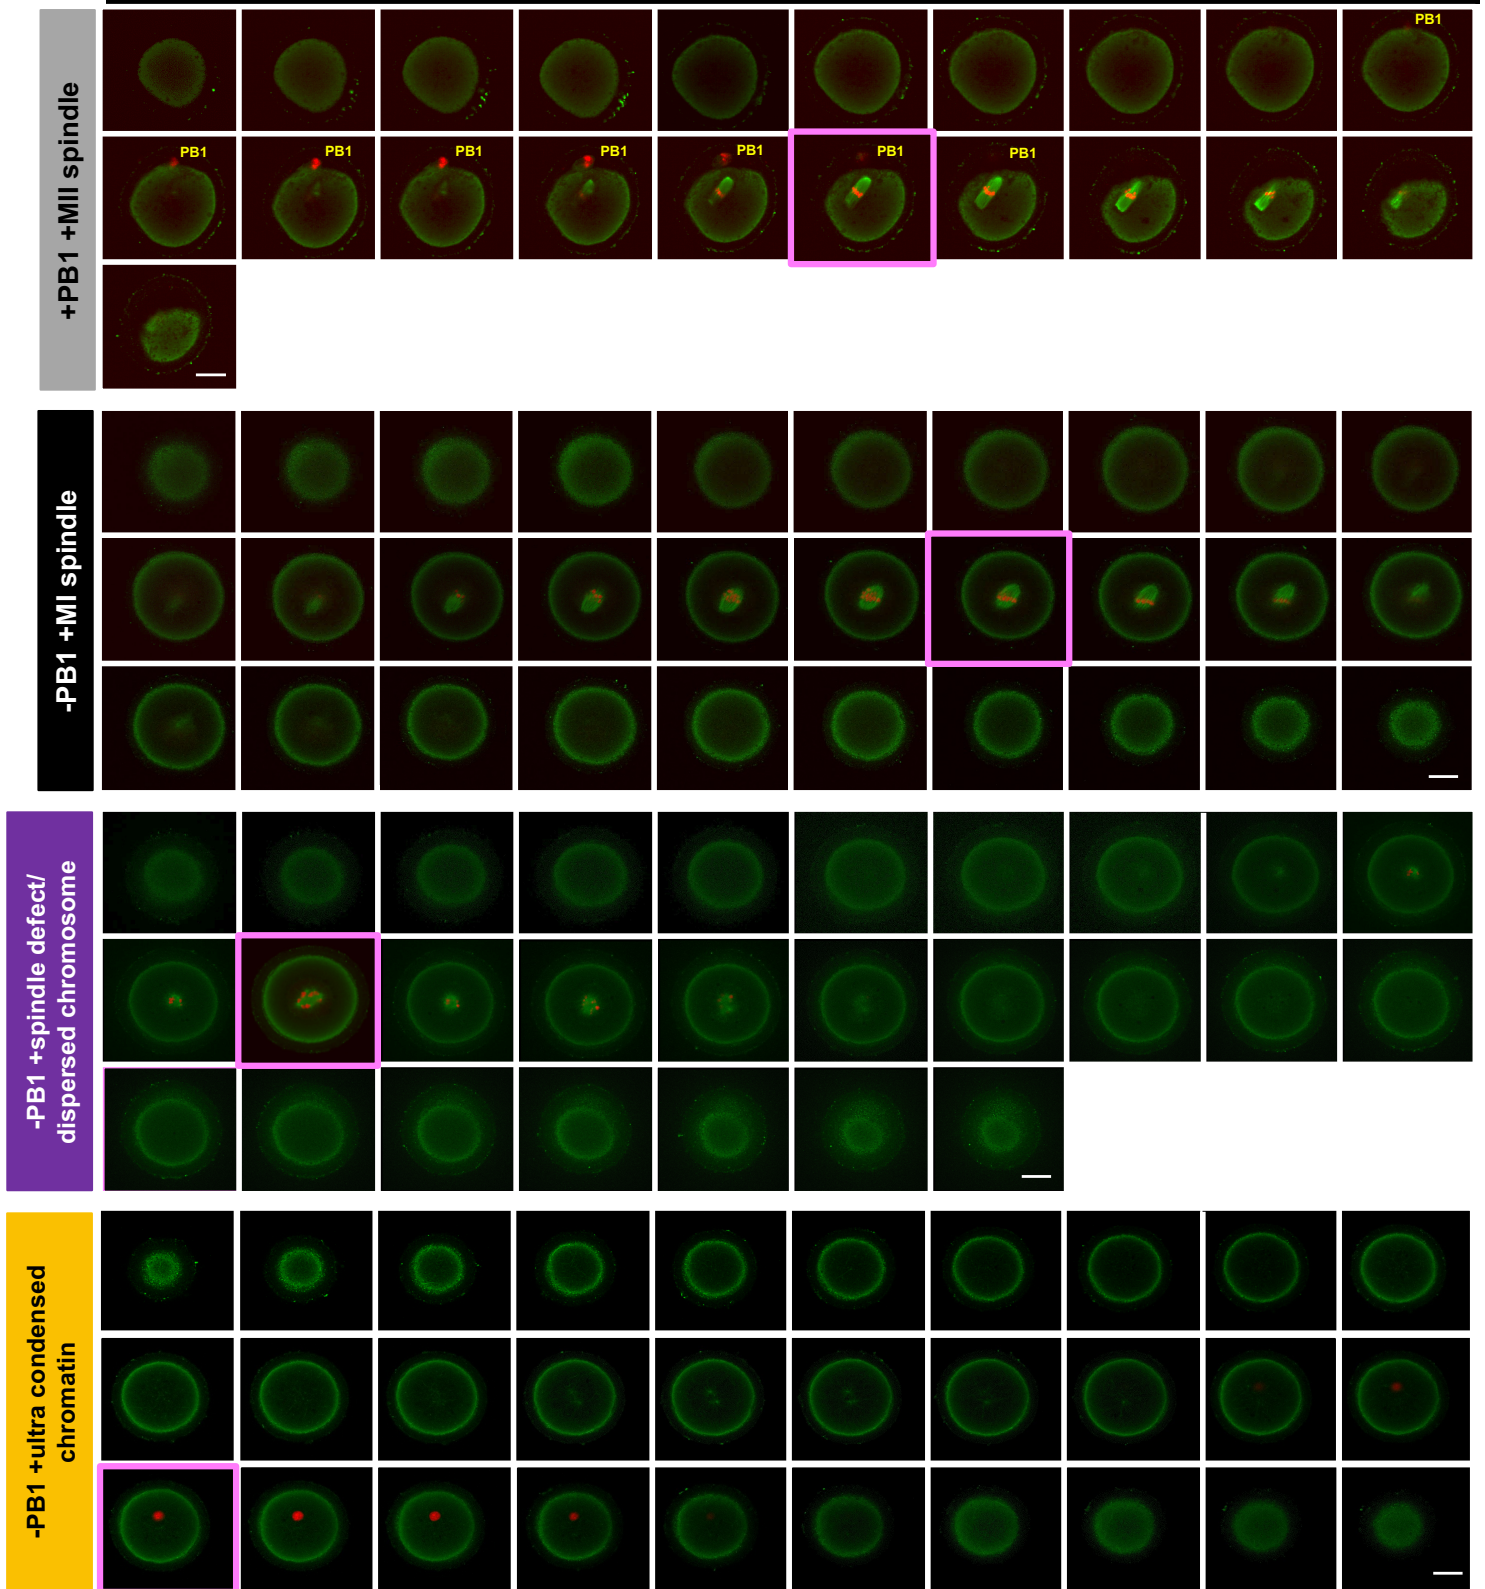

b)

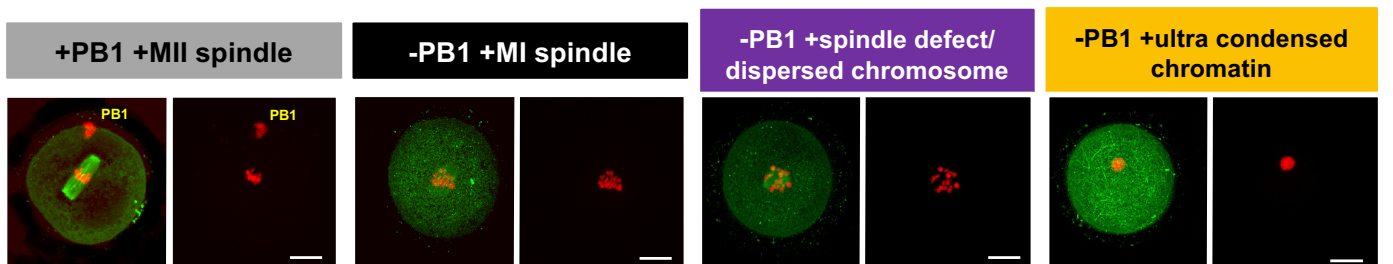

Fig. S5

**Supplementary figure S5: Exemplar confocal micrographs of *Wwc2*-specific siRNA induced mouse oocyte in vitro maturation phenotypes (complete z-series; related to Figure 3).** **a)** Full merged channel (DAPI-stained DNA in pseudo-coloured red and immuno-stained  $\alpha$ -tubulin in green) confocal micrograph z-series of individual oocytes illustrating the categories of the IVM phenotypes (see labels on right) elicited by *Wwc2* knockdown (or control siRNA microinjection) as described in Fig. 3 (*i.e.* these are the same oocytes as depicted in the single z-section micrographs of Fig. 3d'); top rows (grey label) indicating successful IVM to the MII arrested stage (+PB1 +MII spindle), second rows (black label) indicating formation of a meiotic spindle without polar body extrusion -PB1 +MI spindle), third rows (purple label) indicating meiotic spindle defects with non-aligned/dispersed chromosomes and absent polar body extrusion (-PB1 +spindle defect/ dispersed chromosomes) and the last rows (yellow label) indicating failed meiotic spindle formation and the presence of condensed chromatin in the absence of a polar body (-PB1 +ultra condensed chromatin). The individual z-stack micrographs that are depicted in Fig. 3d' are framed in magenta. PB1 denotes the first meiotic polar body and the scale bar = 20  $\mu$ m. **b)** Confocal z-series projections of the oocyte individual z-series depicted in panel a), as DAPI +  $\alpha$ -tubulin merges (left) and DAPI alone (right) channels. In all micrographs PB1 denotes the first meiotic polar body and the scale bar = 20  $\mu$ m.

a) b)

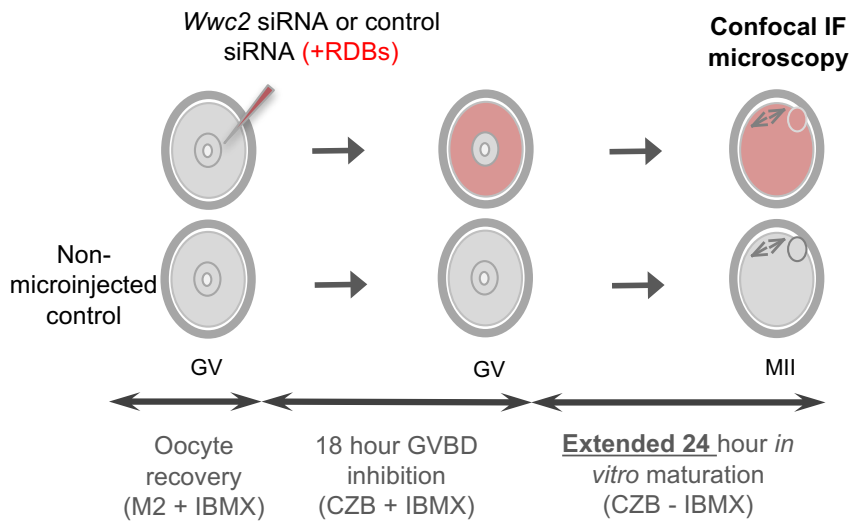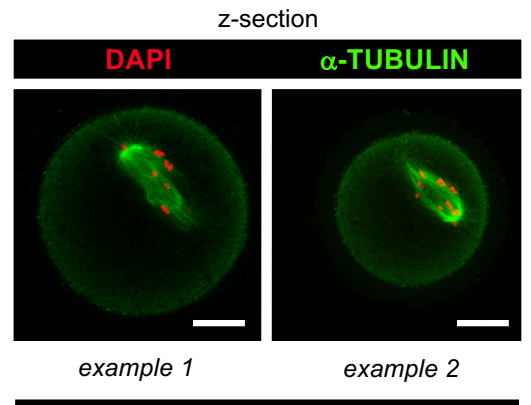

Examples of -PB1 +spindle defect/ dispersed chromosomes (*Wwc2* siRNA)

c)

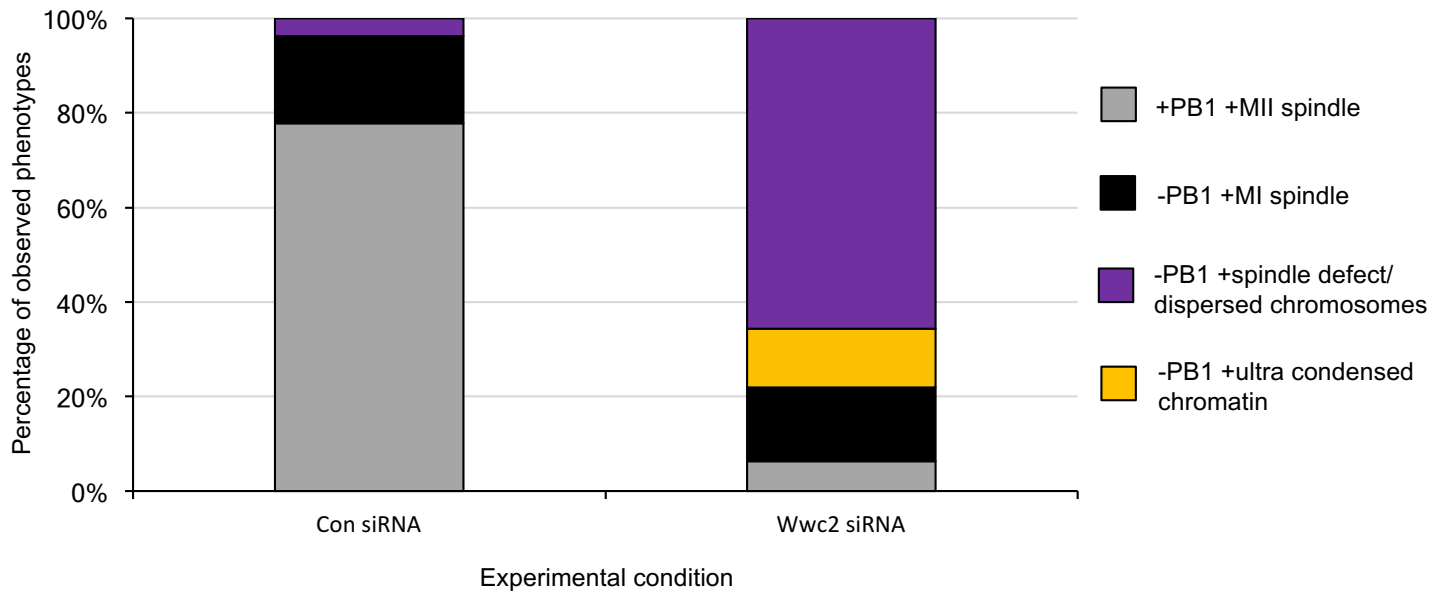

**Supplementary figure S6: Meiotic *in vitro* maturation phenotypes of *Wwc2* KD GV oocytes are persistent (up to 24 hours post-IBMX)** **a)** Experimental schema of *Wwc2* transcript KD in GV oocytes by microinjected *Wwc2* siRNA (plus control siRNA groups), 18 hour incubation in IBMX containing media (preventing GVBD) and extended 24 hour IVM (minus IBMX treatment), followed by IF and confocal microscopic analysis; co-microinjected RDBs were used as injection control marker. **b)** Exemplar single z-section confocal micrographs (two) of *Wwc2* siRNA induced and extended (24 hours) IVM phenotypes, classified as “-PB1 +spindle defect/dispersed chromosomes”. DNA is counter-stained with DAPI (pseudo-coloured red) and microtubules IF stained with anti- $\alpha$ -Tubulin antibodies (green); scale bar = 20 $\mu$ m. **c)** Chart detailing successful IVM maturation frequencies of control siRNA (Con siRNA) and microinjected *Wwc2* siRNA oocytes, to the MII stage or preceding phenotypic stages, as defined/illustrated in Fig. 3d & d’ (including the predominant -PB1 +spindle defect/dispersed chromosomes phenotype observed - panel b). Supplementary tables ST15 summarise statistical analysis and individual oocyte data in each experimental group.

**a)**

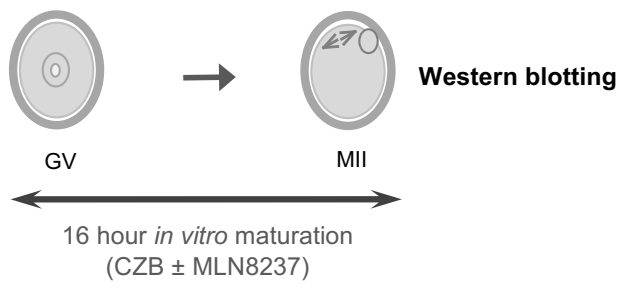

**b)**

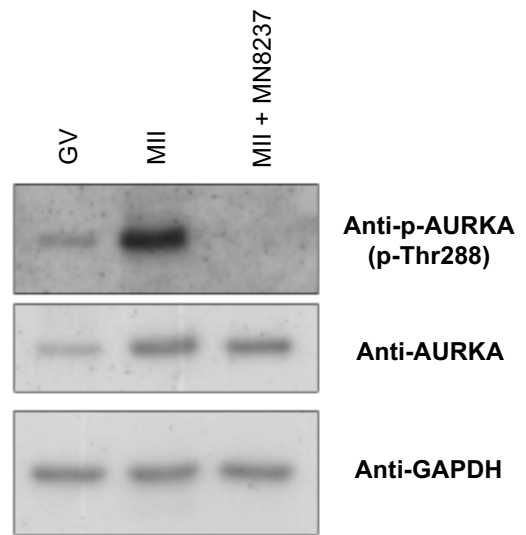

**Supplementary figure S7: anti-p-AURKA (p-Thr288) antibody specificity verification. a)** Experimental strategy to verify specificity of the anti-p-AURKA (p-Thr288) used in western blotting experiments. Recovered GV stage primary oocytes were directly processed for western blotting (as described in the materials and methods) or immediately following *in vitro* maturation (IVM) to the MII arrested stage; in the presence or absence of the confirmed AURKA inhibitor, MLN8237 (1 $\mu$ M: Pollard and Mortimore, 52: 2629-2651, 2009) - MLN8237 blocks auto-phosphorylation/activation of AURKA (Katsha *et al.*, 8:1419-1428, 2014). **b)** Western blots showing activated/phosphorylated p-AURKA (upper panel; probed with anti-p-AURKA/ p-Thr288 primary antibody – Cell Signalling Technology, cs2914), total AURKA (middle panel – BD Biosciences, 610938) or house-keeping control GAPDH (lower panel – Merck, G9545) protein expression levels in freshly recovered GV stage primary oocytes (first lane), IVM MII-arrested secondary oocytes (middle lane) or oocytes subject to IVM in the presence of MLN8237.



**Partial mouse *Wwc2* cDNA sequence (*Wwc2* siRNA target region)**

GACCTGATGCAGAGTCTTCTAAGCTGCAGGAGCGATTTCATTTGGATCAAAACATGGGC 780  
 AGTTCGAGCCAGATCTGAGATCTAGTCCCTGTGAATTCATCTCTCTGTCCAGACAG 840

Complementary *Wwc2* cDNA sequence targeted by *Wwc2* siRNA

AGT TCC GAG CCA GAT CTG AGA TCT AGT CCT GTG  
 S S E P D L R S S P V  
 259 269

Amino acid codon information

AGT TCC GAG CCt GAT tta AGg TCT tcT CCT GTG  
 S S E P D L R S S P V  
 259 269

**Introduced silent mutations in siRNA resistant recombinant HA-*Wwc2* cDNA construct (lowercase)**

**Supplementary figure S8: Information on site directed mutagenesis design to generate siRNA-resistant HA-Wwc2 ‘rescue’ construct (microinjected as a mRNA).** Partial cDNA sequence of mouse genome derived *Wwc2* transcript (upper panel), onto which the recognition sequence of the *Wwc2*-specific siRNA used in this study is highlighted (orange: *i.e.* positions 786-813 bp); a plasmid clone of which was generated during this study (*i.e.* pGEM-T-Easy:HA-Wwc2). Expanded representations of this region, detailing the corresponding amino acid codons (delineated by spaces) and the coded residues in the WWC2 protein (as specified using the single letter code), are provided below. The upper expanded depiction describes the endogenous wild-type *Wwc2* sequence and the lower representation details how this was altered by site directed mutagenesis to yield a mRNA construct that, when *in vitro* transcribed, would be insensitive to RNAi mediated degradation when employing our *Wwc2*-specific siRNA (as there would be insufficient base-pair complementarity). The mutated bases are denoted by lower-case font and occur within the would be recognised *Wwc2*-specific siRNA motif but due to the redundancies in the genetic code, do not alter any amino acid coding information. Hence the only distinguishing feature of protein derived from the siRNA resistant mutated recombinant construct/transcript, in relation to its endogenous counterpart, would be the incorporation of the N-terminal HA-epitope tag.

a)

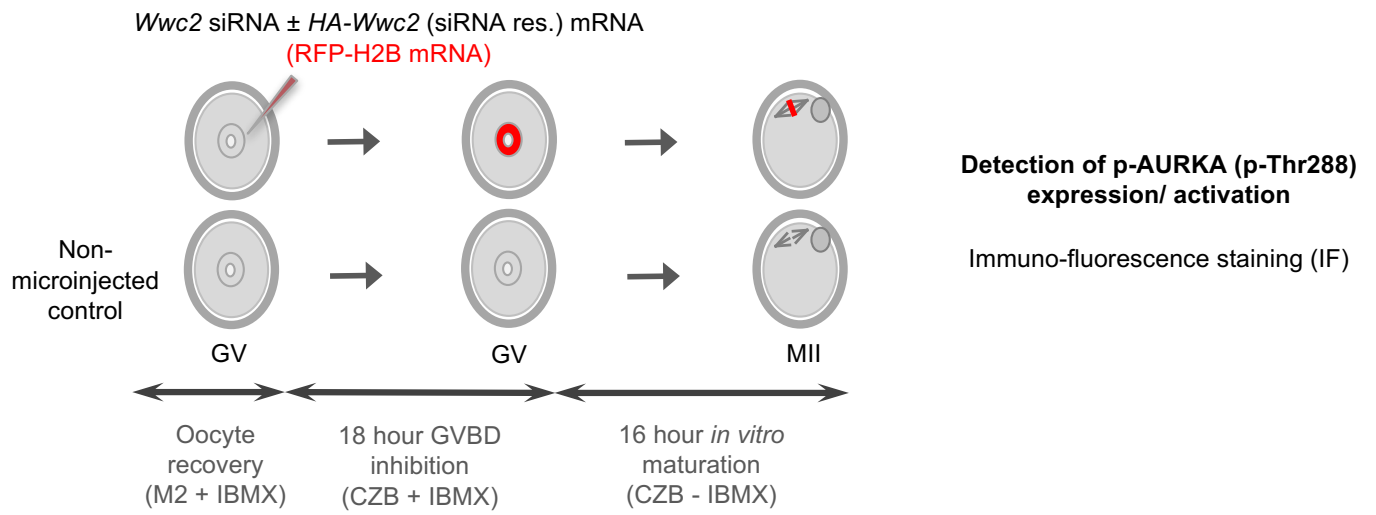

b)

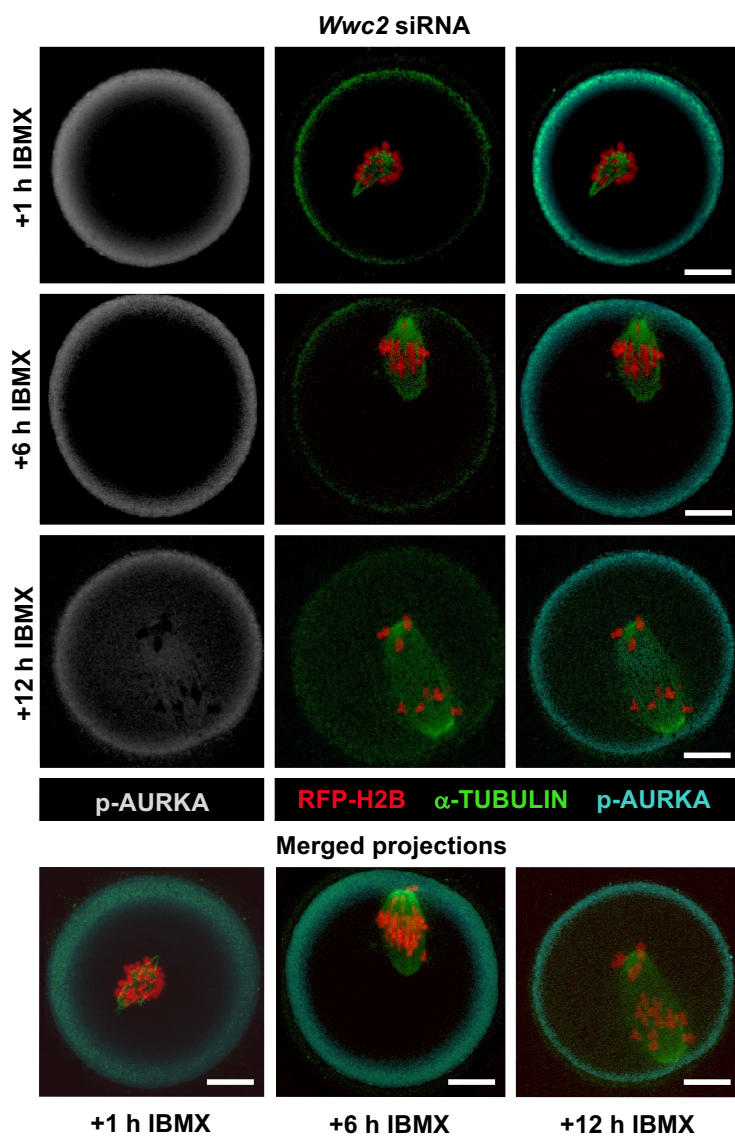

c)

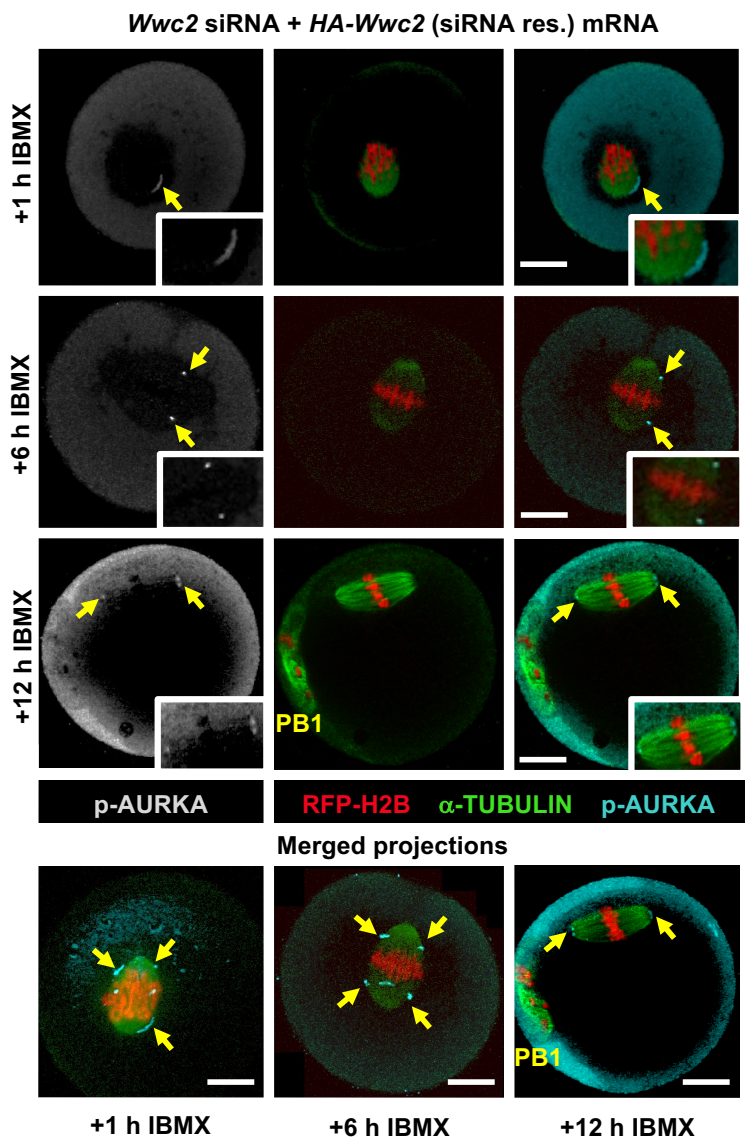

Fig. S9

**Supplementary figure S9: Phenotypic rescue of *Wwc2* KD induced GV oocyte IVM spindle defects by co-microinjection of siRNA resistant *HA-Wwc2* mRNA.** **a)** Experimental schema of GV oocyte microinjection conditions; *i.e.* *Wwc2* siRNA alone or *Wwc2* siRNA + *HA-Wwc2* (siRNA resistant) mRNA, each co-microinjected with RFP-H2B mRNA (injection marker). Microinjected oocytes were incubated in IMBX containing media (18 hours - preventing GVBD), subject to IVM (max. 16 hours – media minus IMBX) and processed (at the indicated time-points) for IF assaying of phospho-Aurora (p-AURKA) and  $\alpha$ -TUBULIN expression/localisation. **b)** Exemplar z-section confocal micrographs of *Wwc2* siRNA alone injected oocytes after IVM to indicated time-points (post IBMX removal). Detected p-AURKA (greyscale; cyan in merge) and  $\alpha$ -TUBULIN (green) expression/localisation, plus the RFP-H2B microinjection reporter (red) are shown. Projected confocal micrographs of colour merged images are depicted at each time-point (lower panels). **c)** As in b) but pertaining to the *Wwc2* siRNA + *HA-Wwc2* (siRNA resistant) mRNA microinjection embryo group. Yellow arrows denote detectable and spindle proximal p-AURKA (p-Thr288) immuno-reactivity (enlarged in the greyscale and merged channel insets); PB1 denotes the extruded first meiotic polar body. In panels b) and c) the scale bar = 20  $\mu$ m.

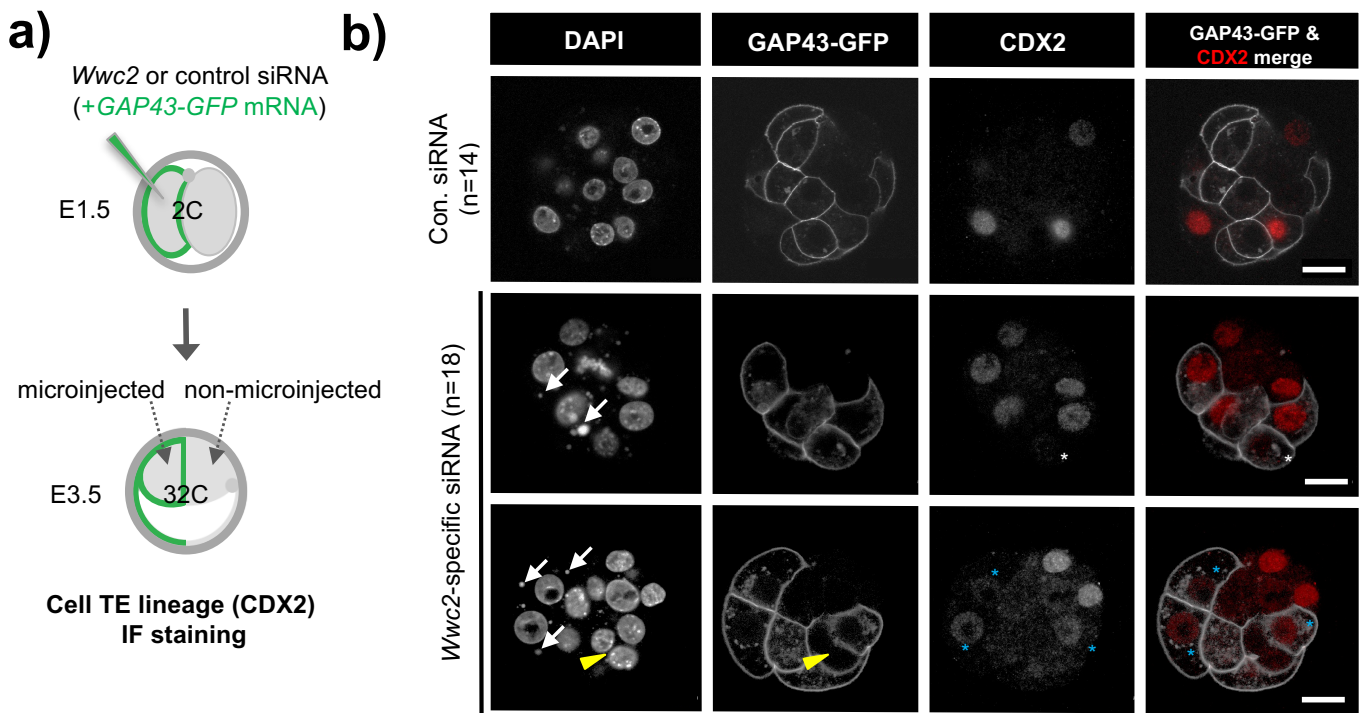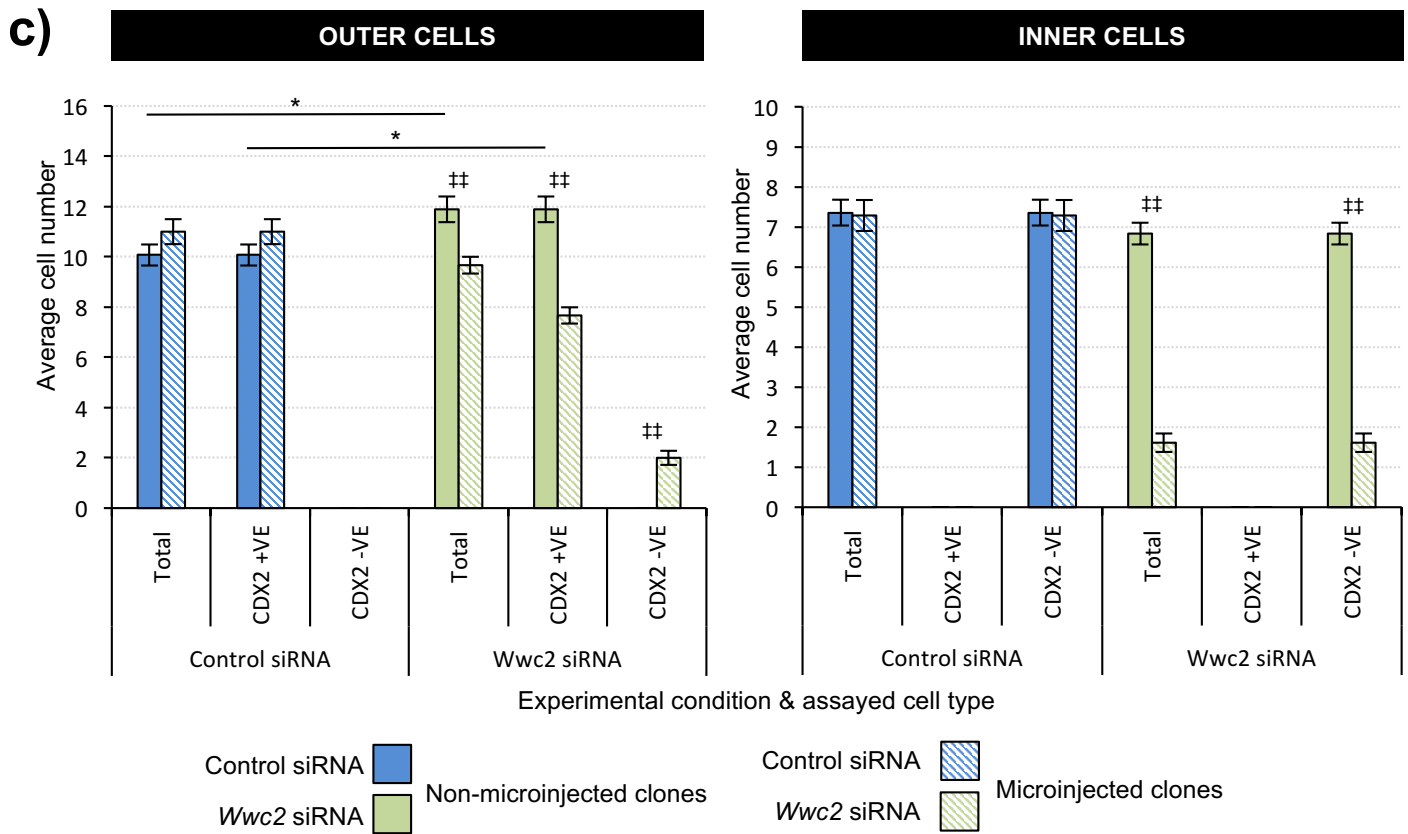

Fig. S10

**Supplementary figure S10: Outer trophectoderm (TE) versus ICM formation in clonal *Wwc2* gene KD at early blastocyst stage.** **a)** Experimental strategy for *Wwc2* expression KD in marked clones (representing 50% of embryo) by co-microinjection (in one blastomere of 2-cell stage embryos) of *Wwc2* siRNA and GAP43-GFP mRNA (stable plasma membrane fluorescent injection clone marker – Inj.) and IF based assay of clonal contribution (microinjected. versus non-microinjected.) to CDX2 (TE marker) positive or negative cells, plus outer and inner-cell embryo populations at 32-cell stage (versus control siRNA microinjections). **b)** Exemplar confocal z-section micrographs of IF stained blastocysts (individual greyscale channels plus merged image; CDX2 is red) from control and *Wwc2* siRNA microinjected groups. Note, white arrows and yellow arrow head denote DAPI stained micronuclei and a bi-nucleated cell, respectively, uniquely found in *Wwc2* siRNA microinjected clones. Blue and white asterisks denote respective low level (compared to non-injected clone) or undetectable outer-cell CDX2 protein expression in *Wwc2* KD clones. The number of embryos in each group is provided; scale bar equals 20 $\mu$ m. **c)** Bar charts describing the average clonal (non-microinjected – solid bars, versus microinjected – hatched bars) contribution of cells from embryos treated/microinjected with control (blue bars) or *Wwc2* siRNA (green bars) to either outer cell or inner cell (ICM) cell populations and cells positive or negative for CDX2 protein expression (IF – as shown in panel b) – same n-numbers). Errors represent s.e.m. and 2-tailed student t-test derived statistical significance between control and *Wwc2* KD groups (asterisks), or clones (non-microinjected vs microinjected) within a group (double crosses) are highlighted with statistical confidence intervals of  $p < 0.05$  and  $p < 0.005$ , as denoted by one or two significance markers, respectively. Supplementary tables ST23 summarise statistical analysis and individual embryo data.

**a)**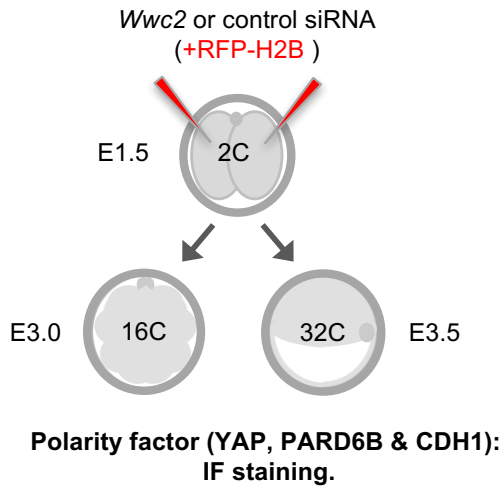**b)**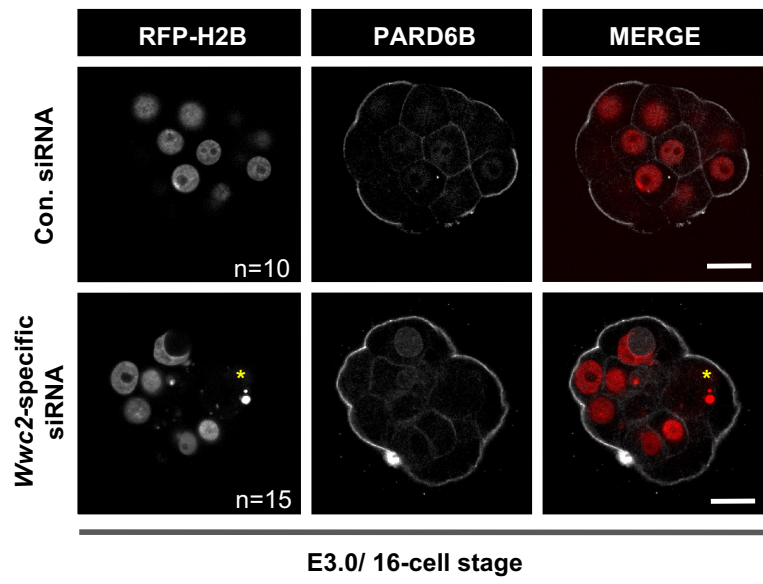**c)**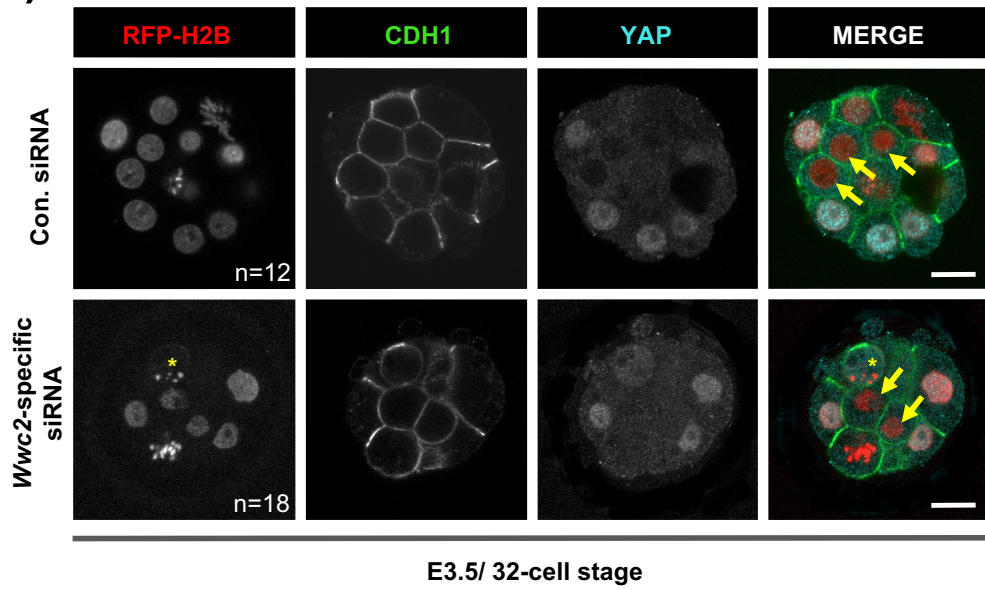

**Supplementary figure S11: *Wwc2* KD does not affect outer-cell apical-basolateral polarisation nor differential inner versus outer-cell Hippo-signalling pathway activity.** **a)** Experimental strategy to assay apical-basolateral polarity factor (PARD6B and CDH1) and Hippo-pathway effector (YAP) protein expression in 16- or 32-cell stage embryos derived from 2-cell stage embryos co-microinjected in both blastomeres with *Wwc2* (or control) siRNA and mRNA for fluorescent histone H2B fusion protein (RFP-H2B). **b)** Representative confocal z-section micrographs of control and *Wwc2* siRNA microinjected embryos IF stained at the 16-cell stage for PARD6B expression. Individual fluorescent channels are shown in greyscale and merged (in which the RFP-H2B signal is red). **c)** As in b) although embryos are assayed at the 32-cell stage and double-IF stained for CDH1 and YAP (respectively, green and cyan in merged images). Yellow arrows denote inner-cells (from each microinjection group) that do not exhibit nuclear accumulated YAP, as opposed to outer-cell populations. In panels b) and c) yellow asterisk denotes the existence of phenotypically characteristic micronuclei in the *Wwc2* siRNA microinjected embryo groups. Additionally, the number of assayed embryos per group is indicated and the scale bar equals 20µm.



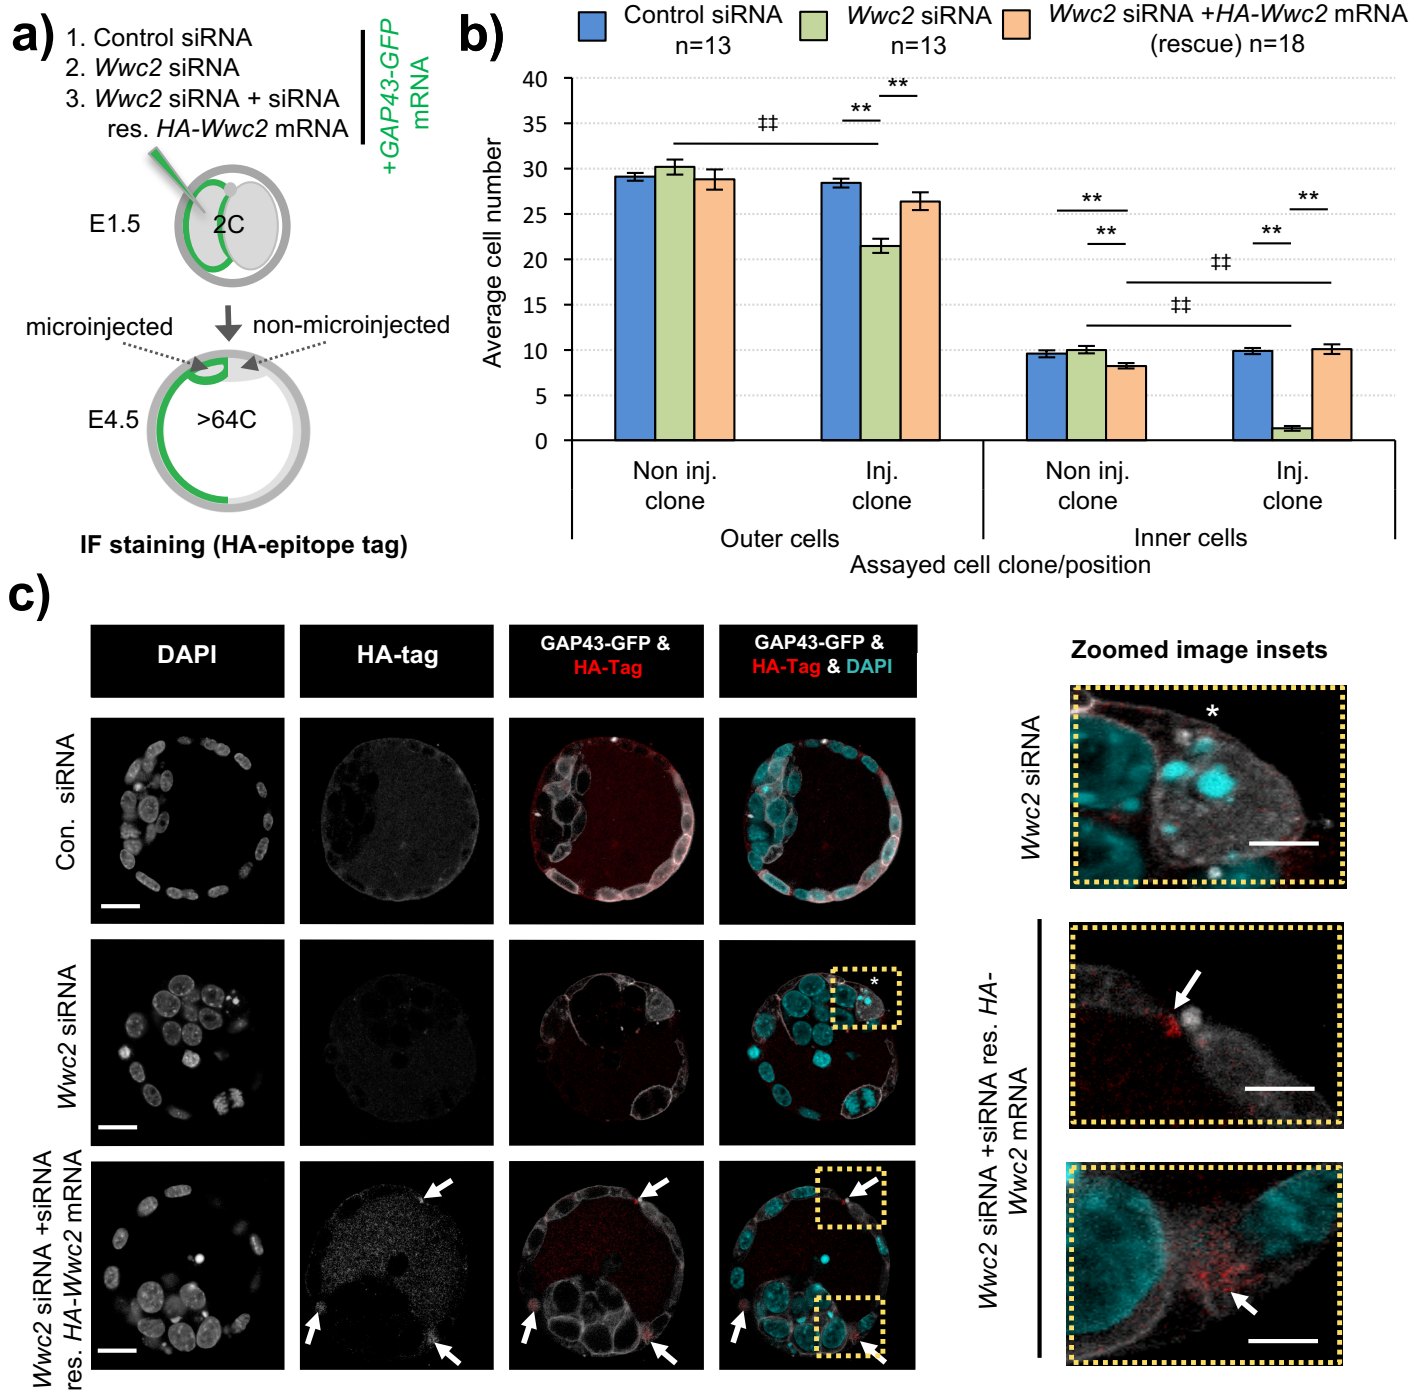

Fig. S12

**Supplementary figure S12: Expression of siRNA resistant *HA-Wwc2* mRNA rescues *Wwc2* siRNA cell number/division phenotypes up to the late blastocyst/E4.5 (>64 cell) stage. a)**

Experimental strategy for potential phenotypic rescue of clonal *Wwc2* KD by comparing co-microinjection (in one blastomere of 2-cell stage embryos) of GAP43-GFP mRNA (stable plasma membrane fluorescent microinjection marker – Inj., to distinguish from the non-microinjected clone – Non inj.) with control siRNA, *Wwc2* siRNA or *Wwc2* siRNA + recombinant *HA-Wwc2* mRNA (containing N-terminal HA-epitope tag and point mutants conferring siRNA resistance – see Fig. S8) and assaying total, outer and inner-cell number at the >64-cell late blastocyst stage. **b)** Average clonal contribution (microinjected/Inj. versus non-microinjected/Non inj.) of outer and ICM/inner cells in control siRNA (blue bars), *Wwc2* siRNA (green bars) and *Wwc2* siRNA + *HA-Wwc2* mRNA (rescue – orange bars) microinjected embryos; errors represent s.e.m. and 2-tailed student t-test derived statistical significance between the experimental groups (asterisks), or clones (microinjected/Inj. versus non-microinjected/Non inj.) within a group (double crosses) highlighted with statistical confidence intervals of  $p < 0.05$  and  $p < 0.005$  (denoted by one or two significance markers, respectively). The number of embryos in each experimental group is provided. **c)** Exemplar confocal z-section micrographs of 32-cell blastocyst stage embryos, derived from the indicated microinjection groups, IF stained to detect HA-epitope tag expression (individual greyscale channels, plus merged images where the anti-HA channel is red and the DAPI cyan). Within the microinjected clone of the *Wwc2* siRNA treated embryo the white asterisk denotes characteristic apoptosis and fragmented nuclei, whilst in the microinjected clone of the *Wwc2* siRNA + *HA-Wwc2* rescue embryo example, the white arrows indicate anti-HA epitope tag IF signal associated with mid-bodies (see also indicated zoomed images - right) – note the association is not as pronounced as at the 32-cell blastocyst stage (Fig. 6); scale bar equals 20 $\mu$ m. Supplementary tables ST25 summarise statistical analysis and individual embryo data used to generate the figure.

**a)** siRNA res. *HA-Wwc2* mRNA(+*GAP43-GFP* mRNA)

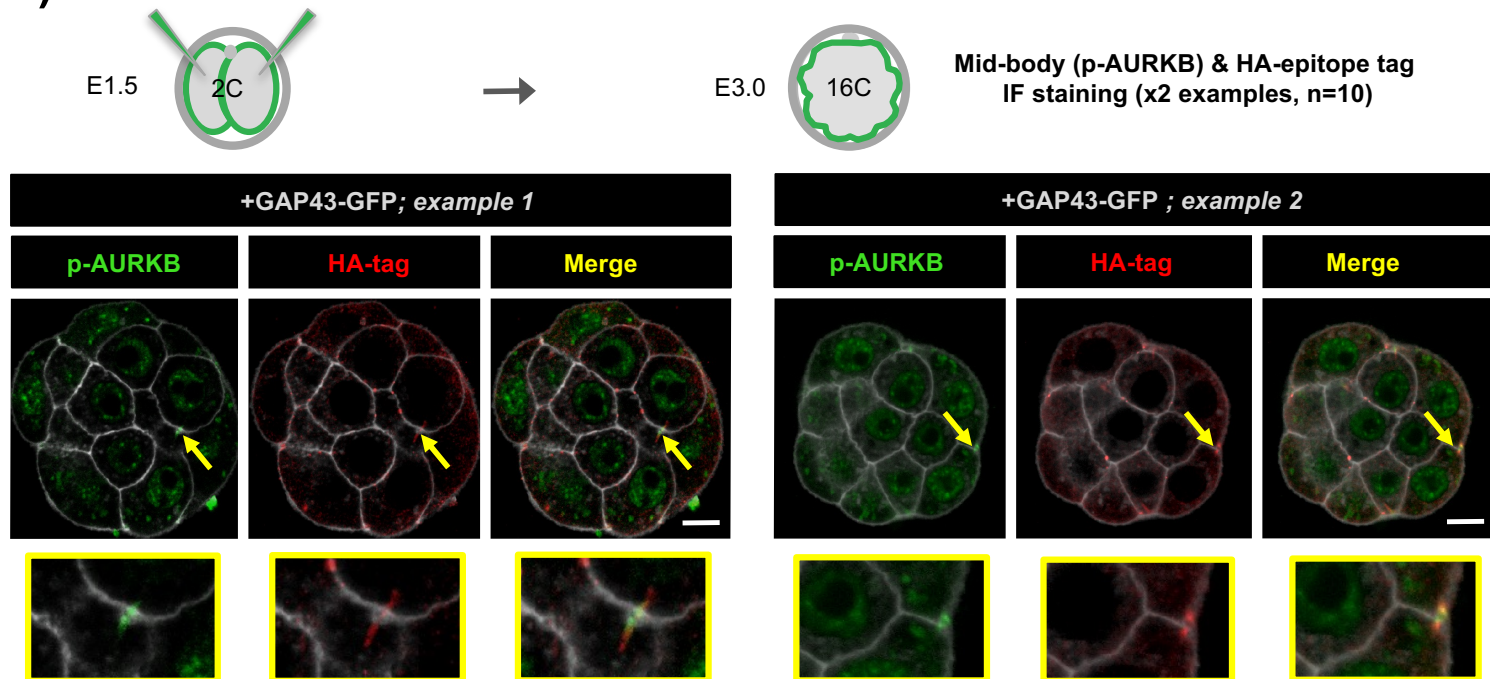

**b)**

*Wwc2* or control siRNA (+*GAP43-GFP* mRNA)

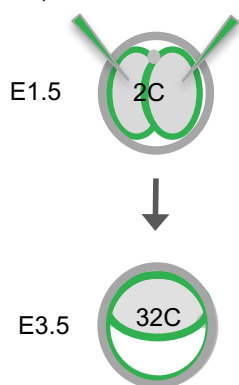

Mid-body ( $\alpha$ -TUBULIN/ p-AURKB) IF staining.

**c)**

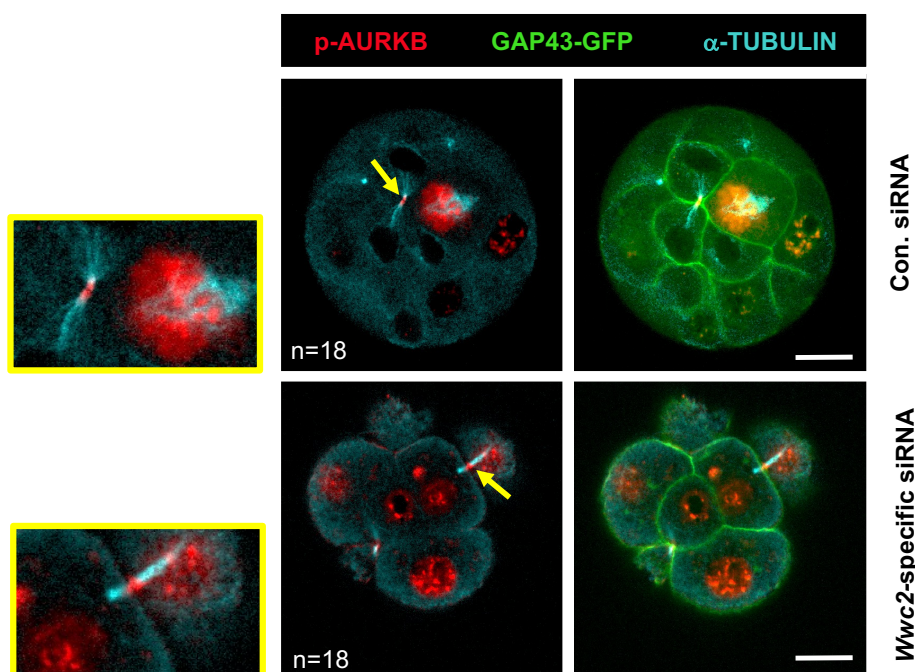

**d)**

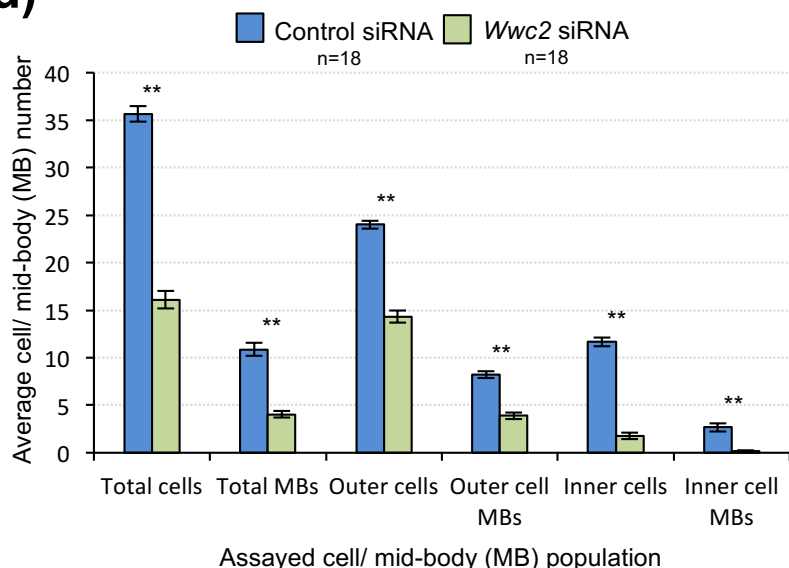

**e)**

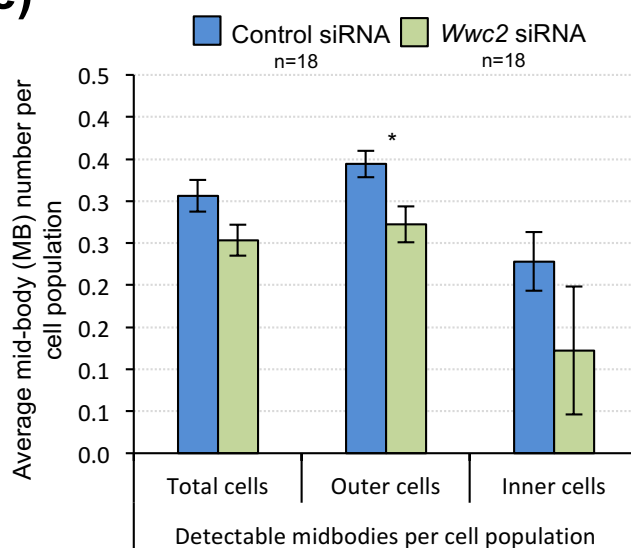

**Fig. S13**

**Supplementary figure S13: Global *Wwc2* KD does not significantly alter the number of detectable mid-bodies by the 32-cell stage.** **a)** Experimental approach to assay co-localisation of recombinant siRNA resistant HA-epitope tagged WWC2 protein with the mitotic mid-body marker phospho-Aurora kinase B (p-AURKB) at the 16-cell stage (upper). Briefly, recovered 2-cell stage embryos were co-microinjected in both blastomeres with recombinant mRNAs encoding siRNA resistant HA-WWC2 and GAP43-GFP (injection marker), cultured to the 16-cell stage and IF stained with antibodies against p-AURKB and HA-epitope tag. Exemplar micrographs (selected single z-sections) of two assayed embryos (lower panels) detail p-AURKB (green), HA-epitope (red) and merged channels; yellow arrows highlight mid-body structures, with magnified images of the regions of interest provided in the lower insets (note, localisation of HA-WWC2 on mid-body proximal microtubules that does not perfectly co-localise with the *de facto* mid-body marker, pAURKB). Scale bar equals 20  $\mu$ m. **b)** Experimental strategy to assay the number of mid-bodies in *Wwc2* KD embryos by co-microinjecting *Wwc2* siRNA (or control siRNA) and GAP43-GFP mRNA (stable plasma membrane fluorescent injection marker) in both cells at the 2-cell stage, fixing after culture to the 32-cell stage and IF staining for the mid-body marker proteins  $\alpha$ -TUBULIN and p-AURKB. **c)** Exemplar confocal z-section micrographs of composite IF stained 32-cell stage embryos; p-AURKB (red),  $\alpha$ -TUBULIN (cyan) and GAP43-GFP (injection marker – green). Yellow arrows denote persistent mid-bodies characteristic of cleavage stage mouse embryos (zoomed images provided; yellow boxes – left). Number of embryos in each microinjection group provided; scale bars equal 20  $\mu$ m). **d)** Average number of cells and detectable mid-bodies (in total or either outer or inner-cell populations; note, inner-cell populations defined by mid-body association with at least one inner-cell) per 32-cell stage embryo after microinjection of control (blue bars) or *Wwc2* (green bars) siRNA. **e)** The average number of mid-bodies observed in each stated microinjection group and cell type category, as normalised to the average cell number for that category (*i.e.* total, outer and inner-cells). In panels d) and e) chart error bars represent s.e.m. and 2-tailed student t-test derived statistical significance between the control and *Wwc2* knockdown groups indicated (\*\*  $p < 0.005$ ). Supplementary tables new ST26 summarise statistical analysis and individual embryo data in each experimental group.

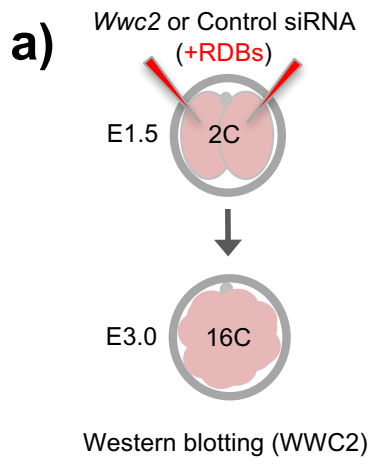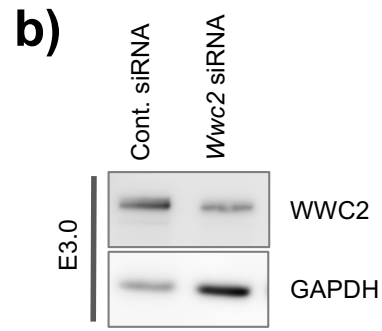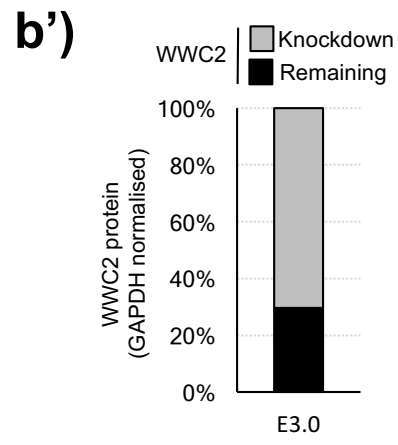

**Supplementary figure S14: WWC2 protein expression in 16-cell mouse embryos after global siRNA mediated knockdown.** **a)** Experimental scheme by which both blastomeres of 2-cell stage embryos were microinjected with either *Wwc2*-specific or control siRNA (plus RDBs as a microinjection marker) and *in vitro* cultured until the 16-cell stage before being processed for western blotting to assay normalised WWC2 protein expression. **b)** Western blots showing WWC2 expression (upper panel) and control GAPDH expression (lower panel) in control and *Wwc2*-specific siRNA microinjected embryos at the 16-cell stage. **b')** Quantification of the extent of *Wwc2*-specific siRNA induced WWC2 protein expression knockdown, from data show in panel b). The black bar denotes the amount of GAPDH normalised WWC2 protein expression remaining, versus the control condition and the grey bar the extent/efficiency of the knockdown.

Human & Mouse KIBRA & WWC2 protein sequence alignment; consensus AURK phosphorylation motifs

|             |                                                               |     |                                                             |     |
|-------------|---------------------------------------------------------------|-----|-------------------------------------------------------------|-----|
| human_KIBRA | ----MPRPELPLPEGWEAEARDFDGKVVYIDHNRNRTSWIDPRDRYTKPLTFADCSIDELP | 56  | ELQSKVEFLLEGATGFRPSCGICITTHEDEVAKTKAEAGGRLQAL-----RSLSGT    | 527 |
| mouse_KIBRA | ----MPRPELPLPEGWEAEARDFDGKVVYIDHNRNRTSWIDPRDRYTKPLTFADCSIDELP | 56  | ELQSKVELLLEGATGFRPSCGICITTHEDEVAKTKAEAGGRLQAL-----RSLSGT    | 527 |
| human_WWC2  | MPRRAGSGQLPLPRGWEAEARDFDGKVVYIDHNRNRTSWIDPRDRYTKPLTFADCSIDELP | 60  | DYQYKLDLFL--QEKSGYIPSGPITTHEDEVVVKSPQPGSLGCVAAATGHTPLAEAA   | 539 |
| mouse_WWC2  | MPRRAGSGQLPLPRGWEAEARDFDGKVVYIDHNRNRTSWIDPRDRYTKPLTFADCSIDELP | 60  | DYQYKLDLFL--QEKGGYIPSGPITTHEDEVVVKSPQPGSLGCVGTASSHTPLTEA    | 539 |
| human_KIBRA | LGWEEAYDPQVGDYFIDHNTKTTQIEDPRVQWRQEHMLKDYLVVAQALSAQKEIYQV     | 116 | PKSMTSLSPSSPSPPCSPMLADPLLAGDAF-----LNSLEFDEPELSATLCELNL     | 581 |
| mouse_KIBRA | LGWEEAYDPQVGDYFIDHNTKTTQIEDPRVQWRQEHMLKDYLVVAQALSAQKEIYQV     | 116 | PKSMTSLSPSSPSPPCSPMLADPLLAGDAF-----LNSLEFDEPELSATLCELNL     | 581 |
| human_WWC2  | WGWEAGDPQIGVYIDHNTKTTQIEDPRKQWRGEQEKMLKDYLVVAQALSAQKELYHV     | 120 | PKSMTSLSPSSPSPPCSPMLADPLLAGDAF-----LNSLEFDEPELSATLCELNL     | 581 |
| mouse_WWC2  | WGWEAGDPQIGVYIDHNTKTTQIEDPRKQWRGEQEKMLKDYLVVAQALSAQKELYHV     | 120 | SKSVASLSRSLSPSPPCSPMLADPLLAGDAF-----LNSLEFDEPELSATLCELNL    | 598 |
| human_KIBRA | KQQRLELAQQEYQQLHAVWEHKLGSQVSLVSGSSSSSKYDPEILKAEIATAKSRVNLKLR  | 176 | GNS-AQE-----RYRLEEPGT---EGKQLG-----QAVNTAQCGGLKVACVS        | 619 |
| mouse_KIBRA | KQQRLELAQQEYQQLHAVWEHKLGSQVSLVSGSSSSSKYDPEILKAEIATAKSRVNLKLR  | 176 | GGSGTQE-----RYRLEEPGP---EGKPLG-----QAASVAPCGGLKVACVS        | 620 |
| human_WWC2  | KEQRALALDEYVRLNDAYKESSSHTLFGSSSSSTKYDPEILKAEIATAKSRVNLKLR     | 180 | IQNQLLSDSGGASQSLSEDKDLNCEAREPLVEGTADVEKSLPKRRVHLLGKETTCSV   | 659 |
| mouse_WWC2  | KEQRALALDEYVRLNDAYKESSSHTLFGSSSSSTKYDPEILKAEIATAKSRVNLKLR     | 180 | GENQALLDSDSGGASQPLLEDKLSDCPGELLCEGATDVEKSLPKRRHLRGGDTTRVS   | 658 |
| human_KIBRA | EMVHLQHELQKQKRGFTLKKIDKMSDAQSGYKLEDAQAVLRKTKAIKAITCGEKEKQ     | 236 | AAVSDSVAGDSGVYEAQVRLGASAAAFFSDSEAVGATRIQIALKYDEKNKQFAILI    | 679 |
| mouse_KIBRA | EMVHLQHELQKQKRGFTLKKIDKMSDAQSGYKLEDAQAVLRKTKAIKAITCGEKEKQ     | 236 | AAVSDSVAGDSGVYEAQVRLGASAAAFFSDSEAVGATRIQIALKYDEKNKQFAILI    | 680 |
| human_WWC2  | ELSQMKQELLYKEQGFETLQIQDKMGGSGYELSEAKAII TELKSIRKAISSGEKEKQ    | 240 | AAVSDSVAGDSGVYEAQVRLGASAAAFFSDSEAVGATRIQIALKYDEKNKQFAILI    | 719 |
| mouse_WWC2  | ELSHMKQELLYKQGFETLQIQDKMGGSGYELSEAKAII TELKSIRKAISSGEKEKQ     | 240 | AAVSDSVAGDSGVYEAQVRLGASAAAFFSDSEAVGATRIQIALKYDEKNKQFAILI    | 718 |
| human_KIBRA | DLIKSLAMLKDFRTRDRGSHDLWSSSSSLESSFPPLKQYLDVSSQTDISGSPGINNN     | 296 | IQLSNLSALLQQDDQKVNIRVAVLPCESESTCLFRTRPLDASDTLVNFVFWMSYPAL   | 739 |
| mouse_KIBRA | DLIKSLAMLKDFRTRDRGSHDLWSSSSSLESSFPPLKQYLDVSSQTDISGSPGINNN     | 296 | IQLSNLSALLQQDDQKVNIRVAVLPCESESTCLFRTRPLDASDTLVNFVFWMSYPAL   | 740 |
| human_WWC2  | DLMQSLAKLQERFLHDQNGRSEPDLRCSFVNSHLCSLQTL DAGSQTISGDI GVRSSR   | 300 | AQLRNLHAFILPHTSKVYFRVAVLPSSDVSCLFRTRVHPPTESILFNDVFRVAISQIAL | 779 |
| mouse_WWC2  | DLMQSLAKLQERFLHDQNGRSEPDLRCSFVNSHLCSLQTL DAGSQTISGDI GVRSSR   | 300 | AQLRNLHAFILPHTSKVYFRVAVLPSSDVSCLFRTRVHPPTESILFNDVFRVAISQIAL | 778 |
| human_KIBRA | QLAEKVRLLRYEEAKRRIANLKIQLAKLDSEAWPGVLDSEDRLLILINEKEELLKEMRF   | 356 | HQKTLRVDVCTTDRSHLEECGGAQISLAEVCRSGERSTRWYNLLSYKYLKQKRELP-   | 798 |
| mouse_KIBRA | QLAEKVRLLRYEEAKRRIANLKIQLAKLDSEAWPGVLDSEDRLLILINEKEELLKEMRF   | 356 | HQKTLRVDVCTTDRSHLEECGGAQISLAEVCRSGERSTRWYNLLSYKYLKQKRELP-   | 799 |
| human_WWC2  | NLAEKVRLSIQYEAERAKRMANLKIQLAKLDSEAWPGVLDSEDRLLILINEKEELLKEMRF | 360 | HQKTLRVDVCTTDRSHLEECGGAQISLAEVCRSGERSTRWYNLLSYKYLKQKRELP-   | 838 |
| mouse_WWC2  | NLAEKVRLSIQYEAERAKRMANLKIQLAKLDSEAWPGVLDSEDRLLILINEKEELLKEMRF | 360 | QQKTLRVDLCSAKHREELAGTQISLADLPFSNEIFMLWYNLLSPKQMPCKKEDNGE    | 838 |
| human_KIBRA | ISPRKWTQGEVQLEMARKLEKDLQAARDTQSKALTERLKLNSKRNQVRELEATROV      | 416 | ---VGMAPASGPASTDAVSALLEQTAVELEKR-----QGRSSSTQTLDS----       | 841 |
| mouse_KIBRA | ISPRKWTQGEVQLEMARKLEKDLQAARDTQSKALTERLKLNSKRNQVRELEATROV      | 416 | ---TE---APGPDHDAVSALLEQTAVELEKR-----QGRSSSTQTLDS----        | 838 |
| human_WWC2  | VTPQKRQDELERLEAERQHEEELLSVRGTPSRALAEERLLEERRKELLQKLEETTKLT    | 420 | DSVFPQNGPLVDSIDLDAVSALLARTSAELLAWEQELAEQEEEEESQEPGRPDGDLWNT | 898 |
| mouse_WWC2  | ITPQKRQDELERLEAERQHEEELLSVRGTPSRALAEERLLEERRKELLQKLEETTKLT    | 420 | EPGARQQPMLDPIDLDAVSALLARTSAELLAWEQELAEQEEEEELRPERGPDGDC---  | 895 |
| human_KIBRA | ATLHSQKLSLSSMSQSLSSGSSPGLTSSRGSLLVASSLSDSSTASFTDLYYDFP-EQLDS  | 475 | -----WRYEETSE-----NEAVAE-----EVEEEEGEEDVTEKASPD             | 878 |
| mouse_KIBRA | ATLHSQKLSLSSMSQSLSSGSSPGLTSSRGSLLVASSLSDSSTASFTDLYYDFP-EQLDS  | 475 | -----WYEEEAEE-----NEAVA-----EVEEEEGEEDVTEKVSPE              | 870 |
| human_WWC2  | TYLHSQKLSLSSMSQSLSSGSSPGLTSSRGSLLVASSLSDSSTASFTDLYYDFP-EQLDS  | 480 | YFLCWLKDDVFTRLTVKPLLLTMRASDEIIVAEKAEVVKLPEDSSCTEDLSSCTSVPE  | 958 |
| mouse_WWC2  | TSLSQKLSLSSMSQSLSSGSSPGLTSSRGSLLVASSLSDSSTASFTDLYYDFP-EQLDS   | 480 | -----LTMRLASDEPAALRESGVLPDVCRLREOSQKEPRVQVSFREKI            | 934 |

Aurora kinase (AURK) consensus recognition motif

(K/R)X(pS/pT)(I/L/V)

-  Motif consensus conserved in human & mouse KIBRA & WWC2
-  Motif consensus conserved between human & mouse WWC2
-  Motif consensus conserved between human & mouse WWC2 & human KIBRA
-  Motif consensus conserved between human & mouse KIBRA
-  Motif originally characterised in Xiao *et al.*, (2011); KIBRA protein phosphorylation is regulated by mitotic kinase Aurora and Protein Phosphatase 1

Fig. S15

**Supplementary figure S15: Primary amino acid sequence alignment of human and mouse KIBRA and WWC2 proteins; with highlighted Aurora kinase consensus phosphorylation motifs.** Amino acid sequence alignments are shown and sequences conforming to the Aurora kinase (AURK) consensus motif [(K/R)X(pS/pT)(I/L/V)] – where pS/pT denote the residue targeted for phosphorylation, highlighted according to the legend provided. All alignments were conducted using default setting of the online Clustal-Ω multiple sequence alignment tool; asterisks (\*) denote perfectly aligned and identical amino acids, whereas colons (:) detail aligned conservative amino acid substitutions.



**B) SUPPLEMENTARY METHODS TABLES: SM1 – SM6**

***Wwc2* is a novel cell division regulator during preimplantation mouse embryo lineage formation and oogenesis.**

Virnicchi *et al.*, 2020

Supplementary Methods Tables SM1

| Microinjected RNAi constructs (Virnicchi <i>et al.</i> , 2020) |                           |                                             |                  |                      |
|----------------------------------------------------------------|---------------------------|---------------------------------------------|------------------|----------------------|
| Type                                                           | Gene Target               | Source (supplier)                           | Cat. No.         | Microinjection conc. |
| dsRNA                                                          | <i>Kibra</i>              | in house synthesised                        | n/a              | 200 ng/ $\mu$ l      |
| dsRNA                                                          | <i>Wwc2</i>               | in house synthesised                        | n/a              | 200 ng/ $\mu$ l      |
| dsRNA                                                          | <i>EGFP</i>               | in house synthesised                        | n/a              | 200 ng/ $\mu$ l      |
| siRNA                                                          | mouse genome neg. control | Qiagen (Murine Allstars neg. control siRNA) | SI03650318       | 10 $\mu$ M           |
| siRNA                                                          | <i>Kibra</i>              | ThermoFisher Scientific (Silencer Select)   | 4390771: s102487 | 10 $\mu$ M           |
| siRNA                                                          | <i>Wwc2</i>               | ThermoFisher Scientific (Silencer Select)   | 4390771: s78812  | 10 $\mu$ M           |

| Microinjected recombinant & IVT derived mRNA constructs (Virnicchi <i>et al.</i> , 2020) |                             |                      |          |                      |
|------------------------------------------------------------------------------------------|-----------------------------|----------------------|----------|----------------------|
| Type                                                                                     | Gene Target                 | Source (supplier)    | Cat. No. | Microinjection conc. |
| mRNA                                                                                     | <i>GAP43-GFP</i>            | in house synthesised | n/a      | 60 ng/ $\mu$ l       |
| mRNA                                                                                     | <i>H2B-RFP</i>              | in house synthesised | n/a      | 40 ng/ $\mu$ l       |
| mRNA                                                                                     | <i>Wwc2-HA (siRNA res.)</i> | in house synthesised | n/a      | 85 ng/ $\mu$ l       |

Supplementary Methods Table SM2

| Oligonucleotide PCR primer sequence for dsRNA template generation (Virnicchi <i>et al.</i> , 2020) |                                                                                       |                                                   |
|----------------------------------------------------------------------------------------------------|---------------------------------------------------------------------------------------|---------------------------------------------------|
| dsRNA gene target                                                                                  | T7 RNA polymerase promoter sequence (lower case) linked gene specific primer sequence |                                                   |
|                                                                                                    | Sense (5'-3')                                                                         | Anti-sense (5'-3')                                |
| Kibra                                                                                              | taatacgactcactatagggGACTTCGACGGCAAGGTCTA                                              | taatacgactcactatagggTCCGACCTGTGGGTCGTAT           |
| Wwc2                                                                                               | taatacgactcactatagggGAGCTGCTGTGTGAGGGC                                                | taatacgactcactatagggAGAAGGCATGAAGATTTCCG          |
| Egfp                                                                                               | taatacgactcactatagggAGAGTACAAATTTTCTGTCAGTGGAGAGG                                     | taatacgactcactatagggAGATGTATAGTTCATCCATGCCATGTGTA |

Supplementary Methods Table SM3

| Recombinant plasmid derivation information (Virnicchi et al., 2020) |                           |                                   |                                                                                                                                                                                      |                                                            |                                                                                                                                       |
|---------------------------------------------------------------------|---------------------------|-----------------------------------|--------------------------------------------------------------------------------------------------------------------------------------------------------------------------------------|------------------------------------------------------------|---------------------------------------------------------------------------------------------------------------------------------------|
| Plasmid name                                                        | Backbone vector           | Insert cDNA(species derived from) | PCR oligonucleotide primer pair sequences (used for insert generation; if applicable)<br>+ introduced restriction enzyme recognition sites for sub cloning (lower case & underlined) |                                                            | Notes                                                                                                                                 |
|                                                                     |                           |                                   | Sense (5'-3') - introduced KOZAK & HA-epitope tag sequences highlighted                                                                                                              | Anti-sense (5'-3')                                         |                                                                                                                                       |
| pRN3-C-term-RFP-Hist1h2bb                                           | pRN3-insert-RFP           | Hist1h2bb, histonme H2B (mouse)   | GACTAT <u>gctagc</u> CCAGAGCCTTCTAAGTCTGCAC                                                                                                                                          | GACTAT <u>gctagc</u> CTTGAGCTGGTGTACTTGGTGA                | insert generating PCR oligos lack 'start' and 'stop' codons, as these are encoded in the vector (allowing N & C-terminal RFP fusions) |
| pGEM-T-Easy-N-term-HA-wildtype-Wwc2                                 | pGEM <sup>®</sup> -T-Easy | Wwc2, wildtype (mouse)            | GACTAT <u>actagt</u> <u>gCCACCATGggetaccatacagatgttctctgactatgct</u> CCTAGGAGGGCCGGGAGC ( <i>SpeI</i> )                                                                              | GACTAT <u>agggcagc</u> TCACACGTCGTCAGCGGGC ( <i>NotI</i> ) | Insert generated by PCR and 'TA' cloned into pGEM <sup>®</sup> -T-Easy (and sequence verified)                                        |
| pGEM-T-Easy-N-term-HA-siRNAres-Wwc2                                 | pGEM <sup>®</sup> -T-Easy | Wwc2, siRNA resistant (mouse)     | n/a (Wwc2 siRNA recognition sequence mutated <i>in situ</i> by SDM; commercial serve - EuorFins)                                                                                     |                                                            | siRNA resistant mutant derived by commercial SDM (siRNA recognition motif mutated, codon info retained - see Fig. S8)                 |

Supplementary Methods Table SM4

| Q-RT-PCR Oligonucleotide primer sequences (Virnicchi <i>et al.</i> , 2020) |                                           |                            |
|----------------------------------------------------------------------------|-------------------------------------------|----------------------------|
| Target gene mRNA/ cDNA                                                     | Q-RT-PCR oligonucleotide primer sequences |                            |
|                                                                            | Sense (5'-3')                             | Anti-sense (5'-3')         |
| <i>Tbp</i> (TATA-binding protein)                                          | GAAGAACAATCCAGACTAGCAGCA                  | CCTTATAGGGAAC TTCACATCACAG |
| <i>Kibra</i>                                                               | ATGATGAGAGCTGCTGCCAAGG                    | ATCCGAGGCCGGGTGAAAAATG     |
| <i>Wwc2</i>                                                                | TGCTGGAGGACGAGAGATTC                      | GAGACCTGCCTCATCAACCT       |

Supplementary Methods Tables SM5

| Primary antibody (immuno-fluorescence staining) information (Virnicchi <i>et al.</i> , 2020) |                        |              |                            |                               |               |                                                 |
|----------------------------------------------------------------------------------------------|------------------------|--------------|----------------------------|-------------------------------|---------------|-------------------------------------------------|
| #                                                                                            | Antigen                | cat. no.     | Supplier                   | Species raised in & clonicity | Dilution used | Secondary antibody combination used (see below) |
| 1                                                                                            | CDH1                   | 3195         | Cell Signalling Technology | rabbit, polyclonal            | 1 in 500      | E                                               |
| 2                                                                                            | CDX2                   | MU392A-UC    | BioGenex                   | mouse, monoclonal             | 1 in 200      | D                                               |
| 3                                                                                            | GATA4                  | sc-9053      | Santa Cruz                 | rabbit, polyclonal            | 1 in 100      | E                                               |
| 4                                                                                            | HA-TAG                 | ab9134       | Abcam                      | goat, polyclonal              | 1 in 200      | H                                               |
| 5                                                                                            | NANOG                  | 14-5761      | Affymetrix/eBioscience     | rat, monoclonal               | 1 in 100      | B                                               |
| 6                                                                                            | PARD6B                 | sc-67393     | Santa Cruz                 | rabbit, polyclonal            | 1 in100       | G                                               |
| 7                                                                                            | phospho-AURKA (Thr288) | NB100-2371   | Novus Biologicals          | rabbit, polyclonal            | 1 in 200      | E                                               |
| 8                                                                                            | phospho-AURKB (Thr232) | 600-401-677S | Rockland Antibodies        | rabbit, polyclonal            | 1 in 200      | F                                               |
| 9                                                                                            | SOX2                   | sc-365823    | Santa Cruz                 | mouse, monoclonal             | 1 in 200      | D                                               |
| 10                                                                                           | TUBULIN (alpha)        | A11126       | ThermoFisher Scientific    | mouse, monoclonal             | 1 in 200      | A/C                                             |
| 11                                                                                           | YAP1                   | sc-101199    | Santa Cruz                 | mouse, monoclonal             | 1 in100       | A                                               |

| Secondary antibody (immuno-fluorescence staining) information (Virnicchi <i>et al.</i> , 2020) |                               |             |                              |                                 |               |                                               |
|------------------------------------------------------------------------------------------------|-------------------------------|-------------|------------------------------|---------------------------------|---------------|-----------------------------------------------|
| #                                                                                              | Species of antibody targetted | cat. no.    | Supplier                     | Species raised in & fluorophore | Dilution used | Primary antibody combination used (see above) |
| A                                                                                              | mouse                         | 715-605-150 | Jackson Immuno Research Inc. | donkey, Alexa647                | 1 in 500      | 10/11                                         |
| B                                                                                              | rat                           | 715-096-150 | Jackson Immuno Research Inc. | donkey, FITC                    | 1 in 400      | 5                                             |
| C                                                                                              | mouse                         | A-21202     | ThermoFisher Scientific      | donkey Alexa488                 | 1 in 500      | 10                                            |
| D                                                                                              | mouse                         | A-31570     | ThermoFisher Scientific      | donkey Alexa555                 | 1 in 500      | 2/9                                           |
| E                                                                                              | rabbit                        | A-21206     | ThermoFisher Scientific      | donkey, Alexa488                | 1 in 500      | 1/3/7                                         |
| F                                                                                              | rabbit                        | A-31572     | ThermoFisher Scientific      | donkey Alexa555                 | 1 in 500      | 8/9                                           |
| G                                                                                              | rabbit                        | A-31573     | ThermoFisher Scientific      | donkey, Alexa647                | 1 in 500      | 6                                             |
| H                                                                                              | goat                          | A-21432     | ThermoFisher Scientific      | donkey, Alexa555                | 1 in 500      | 4                                             |

Supplementary Methods Tables SM6

| Primary antibody (western blot) information (Virnicchi <i>et al.</i> , 2020) |                        |          |                            |                               |               |                                                 |
|------------------------------------------------------------------------------|------------------------|----------|----------------------------|-------------------------------|---------------|-------------------------------------------------|
| #                                                                            | Antigen                | cat. no. | Supplier                   | Species raised in & clonicity | Dilution used | Secondary antibody combination used (see below) |
| 1                                                                            | phospho-AURKA (Thr288) | 2914     | Cell Signalling Technology | rabbit, monoclonal            | 1 in 2,000    | A                                               |
| 2                                                                            | WWC2                   | ab126356 | Abcam                      | rabbit, polyclonal            | 1 in 500      | A                                               |
| 3                                                                            | GAPDH                  | G9545    | Merck (Sigma-Aldrich)      | rabbit, polyclonal            | 1 in 20,000   | A                                               |
| 4                                                                            | AURKA                  | 4718     | Cell Signalling Technology | rabbit, monoclonal            | 1 in 100      | A                                               |

| Secondary HRP-CONJUGATED antibody (western blot) information (Virnicchi <i>et al.</i> , 2020) |                               |             |                              |                    |               |                                               |
|-----------------------------------------------------------------------------------------------|-------------------------------|-------------|------------------------------|--------------------|---------------|-----------------------------------------------|
| #                                                                                             | Species of antibody targetted | cat. no.    | Supplier                     | Species raised in  | Dilution used | Primary antibody combination used (see above) |
| A                                                                                             | rabbit                        | 711-035-152 | Jackson Immuno Research Inc. | donkey, polyclonal | 1 in 10,000   | 1/2/3/4                                       |

**C) SUPPLEMENTARY TABLES (individual embryo cell counts & oocyte phenotypes + statistics): ST1 – ST26**

***Wwc2* is a novel cell division regulator during preimplantation mouse embryo lineage formation and oogenesis.**

Virnicchi *et al.*, 2020



Supplementary Tables ST1

| Control siRNA (10 $\mu$ M), 2in2 micro-injection, 4-cell (E2.0) stage |                              |                                |                                                                          |                                                                |                         |
|-----------------------------------------------------------------------|------------------------------|--------------------------------|--------------------------------------------------------------------------|----------------------------------------------------------------|-------------------------|
| #                                                                     | Total cell number per embryo | Total number of dividing cells | Number of cells exhibiting an atypical/ unusual phenotype morphology     |                                                                |                         |
|                                                                       |                              |                                | Abnormal nuclear morphology (e.g. non-spheroidal or mid-body associated) | Defective cytokinesis (i.e. >x2 equally sized nuclei per cell) | Presence of micronuclei |
| 1                                                                     | 4                            | 0                              | 0                                                                        | 0                                                              | 0                       |
| 2                                                                     | 4                            | 0                              | 0                                                                        | 0                                                              | 0                       |
| 3                                                                     | 4                            | 0                              | 0                                                                        | 0                                                              | 0                       |
| 4                                                                     | 4                            | 0                              | 0                                                                        | 0                                                              | 0                       |
| 5                                                                     | 4                            | 0                              | 0                                                                        | 0                                                              | 0                       |
| 6                                                                     | 4                            | 0                              | 0                                                                        | 0                                                              | 0                       |
| 7                                                                     | 4                            | 0                              | 0                                                                        | 0                                                              | 0                       |
| 8                                                                     | 4                            | 0                              | 0                                                                        | 0                                                              | 0                       |
| 9                                                                     | 3                            | 1                              | 0                                                                        | 0                                                              | 0                       |
| 10                                                                    | 4                            | 0                              | 0                                                                        | 0                                                              | 0                       |
| 11                                                                    | 4                            | 0                              | 0                                                                        | 0                                                              | 0                       |
| 12                                                                    | 4                            | 0                              | 0                                                                        | 0                                                              | 0                       |
| 13                                                                    | 4                            | 0                              | 0                                                                        | 0                                                              | 0                       |
| <b>TOTAL</b>                                                          | <b>51</b>                    | <b>1</b>                       | <b>0</b>                                                                 | <b>0</b>                                                       | <b>0</b>                |
| <b>AVERAGE</b>                                                        | <b>3.9</b>                   | <b>0.1</b>                     | <b>0.0</b>                                                               | <b>0.0</b>                                                     | <b>0.0</b>              |
| <b>SEM</b>                                                            | <b>0.1</b>                   | <b>0.08</b>                    | <b>0.0</b>                                                               | <b>0.0</b>                                                     | <b>0.0</b>              |

| Wwc2-specific siRNA (10 $\mu$ M), 2in2 micro-injection, 4-cell (E2.0) stage |                              |                                |                                                                          |                                                                |                         |
|-----------------------------------------------------------------------------|------------------------------|--------------------------------|--------------------------------------------------------------------------|----------------------------------------------------------------|-------------------------|
| #                                                                           | Total cell number per embryo | Total number of dividing cells | Number of cells exhibiting an atypical/ unusual phenotype morphology     |                                                                |                         |
|                                                                             |                              |                                | Abnormal nuclear morphology (e.g. non-spheroidal or mid-body associated) | Defective cytokinesis (i.e. >x2 equally sized nuclei per cell) | Presence of micronuclei |
| 1                                                                           | 4                            | 0                              | 0                                                                        | 0                                                              | 0                       |
| 2                                                                           | 4                            | 0                              | 0                                                                        | 0                                                              | 0                       |
| 3                                                                           | 4                            | 0                              | 0                                                                        | 0                                                              | 0                       |
| 4                                                                           | 4                            | 0                              | 0                                                                        | 0                                                              | 0                       |
| 5                                                                           | 4                            | 0                              | 0                                                                        | 0                                                              | 0                       |
| 6                                                                           | 3                            | 1                              | 0                                                                        | 0                                                              | 0                       |
| 7                                                                           | 4                            | 0                              | 0                                                                        | 0                                                              | 0                       |
| 8                                                                           | 4                            | 0                              | 0                                                                        | 0                                                              | 0                       |
| 9                                                                           | 4                            | 0                              | 0                                                                        | 0                                                              | 0                       |
| 10                                                                          | 4                            | 0                              | 0                                                                        | 0                                                              | 0                       |
| 11                                                                          | 4                            | 0                              | 0                                                                        | 0                                                              | 0                       |
| 12                                                                          | 4                            | 0                              | 0                                                                        | 0                                                              | 0                       |
| 13                                                                          | 4                            | 0                              | 0                                                                        | 0                                                              | 0                       |
| 14                                                                          | 4                            | 0                              | 0                                                                        | 0                                                              | 0                       |
| <b>TOTAL</b>                                                                | <b>55</b>                    | <b>1</b>                       | <b>0</b>                                                                 | <b>0</b>                                                       | <b>0</b>                |
| <b>AVERAGE</b>                                                              | <b>3.9</b>                   | <b>0.1</b>                     | <b>0.0</b>                                                               | <b>0.0</b>                                                     | <b>0.0</b>              |
| <b>SEM</b>                                                                  | <b>0.1</b>                   | <b>0.1</b>                     | <b>0.0</b>                                                               | <b>0.0</b>                                                     | <b>0.0</b>              |
| Stat. sig. (exp. vs. con embryo) *p<0.05, **p<0.005                         |                              |                                |                                                                          |                                                                |                         |
| p-value (2-tailed students t-test)                                          | 9.59E-01                     | 9.59E-01                       | n/a                                                                      | n/a                                                            | n/a                     |

Supplementary Tables ST2

| Control siRNA (10 $\mu$ M), 2in2 micro-injection, 8-cell (E2.5) stage |                              |                                |                                                                          |                                                                |                         |
|-----------------------------------------------------------------------|------------------------------|--------------------------------|--------------------------------------------------------------------------|----------------------------------------------------------------|-------------------------|
| #                                                                     | Total cell number per embryo | Total number of dividing cells | Number of cells exhibiting an atypical/ unusual phenotype morphology     |                                                                |                         |
|                                                                       |                              |                                | Abnormal nuclear morphology (e.g. non-spheroidal or mid-body associated) | Defective cytokinesis (i.e. >x2 equally sized nuclei per cell) | Presence of micronuclei |
| 1                                                                     | 6                            | 0                              | 0                                                                        | 0                                                              | 0                       |
| 2                                                                     | 8                            | 0                              | 0                                                                        | 0                                                              | 0                       |
| 3                                                                     | 8                            | 0                              | 0                                                                        | 0                                                              | 0                       |
| 4                                                                     | 8                            | 0                              | 0                                                                        | 0                                                              | 0                       |
| 5                                                                     | 8                            | 0                              | 0                                                                        | 0                                                              | 0                       |
| 6                                                                     | 8                            | 0                              | 0                                                                        | 0                                                              | 0                       |
| <b>TOTAL</b>                                                          | <b>46</b>                    | <b>0</b>                       | <b>0</b>                                                                 | <b>0</b>                                                       | <b>0</b>                |
| <b>AVERAGE</b>                                                        | <b>7.7</b>                   | <b>0.0</b>                     | <b>0.0</b>                                                               | <b>0.0</b>                                                     | <b>0.0</b>              |
| <b>SEM</b>                                                            | <b>0.3</b>                   | <b>0.0</b>                     | <b>0.0</b>                                                               | <b>0.0</b>                                                     | <b>0.0</b>              |

| Wwc2-specific siRNA (10 $\mu$ M), 2in2 micro-injection, 8-cell (E2.5) stage |                              |                                |                                                                          |                                                                |                         |
|-----------------------------------------------------------------------------|------------------------------|--------------------------------|--------------------------------------------------------------------------|----------------------------------------------------------------|-------------------------|
| #                                                                           | Total cell number per embryo | Total number of dividing cells | Number of cells exhibiting an atypical/ unusual phenotype morphology     |                                                                |                         |
|                                                                             |                              |                                | Abnormal nuclear morphology (e.g. non-spheroidal or mid-body associated) | Defective cytokinesis (i.e. >x2 equally sized nuclei per cell) | Presence of micronuclei |
| 1                                                                           | 7                            | 1                              | 2                                                                        | 0                                                              | 0                       |
| 2                                                                           | 7                            | 0                              | 0                                                                        | 0                                                              | 0                       |
| 3                                                                           | 6                            | 0                              | 0                                                                        | 0                                                              | 0                       |
| 4                                                                           | 8                            | 0                              | 0                                                                        | 0                                                              | 0                       |
| 5                                                                           | 8                            | 0                              | 3                                                                        | 0                                                              | 0                       |
| 6                                                                           | 8                            | 0                              | 0                                                                        | 0                                                              | 0                       |
| 7                                                                           | 8                            | 0                              | 0                                                                        | 0                                                              | 0                       |
| <b>TOTAL</b>                                                                | <b>52</b>                    | <b>1</b>                       | <b>5</b>                                                                 | <b>0</b>                                                       | <b>0</b>                |
| <b>AVERAGE</b>                                                              | <b>7.4</b>                   | <b>0.1</b>                     | <b>0.7</b>                                                               | <b>0.0</b>                                                     | <b>0.0</b>              |
| <b>SEM</b>                                                                  | <b>0.3</b>                   | <b>0.1</b>                     | <b>0.5</b>                                                               | <b>0.0</b>                                                     | <b>0.0</b>              |
| Stat. sig. (exp. vs. con embryo) *p<0.05, **p<0.005                         |                              |                                |                                                                          |                                                                |                         |
| p-value (2-tailed students t-test)                                          | 6.04E-01                     | 3.77E-01                       | 1.93E-01                                                                 | n/a                                                            | n/a                     |

| Control siRNA (10 $\mu$ M), 2in2 micro-injection, 16-cell (E3.0) stage |                              |                                |                                                                          |                                                                |                         |
|------------------------------------------------------------------------|------------------------------|--------------------------------|--------------------------------------------------------------------------|----------------------------------------------------------------|-------------------------|
| #                                                                      | Total cell number per embryo | Total number of dividing cells | Number of cells exhibiting an atypical/ unusual phenotype morphology     |                                                                |                         |
|                                                                        |                              |                                | Abnormal nuclear morphology (e.g. non-spheroidal or mid-body associated) | Defective cytokinesis (i.e. >x2 equally sized nuclei per cell) | Presence of micronuclei |
| 1                                                                      | 15                           |                                | 0                                                                        | 0                                                              | 0                       |
| 2                                                                      | 16                           |                                | 0                                                                        | 0                                                              | 0                       |
| 3                                                                      | 14                           |                                | 0                                                                        | 0                                                              | 0                       |
| 4                                                                      | 16                           |                                | 0                                                                        | 0                                                              | 0                       |
| 5                                                                      | 16                           |                                | 0                                                                        | 0                                                              | 0                       |
| 6                                                                      | 16                           |                                | 0                                                                        | 0                                                              | 0                       |
| 7                                                                      | 19                           |                                | 0                                                                        | 0                                                              | 0                       |
| 8                                                                      | 16                           |                                | 0                                                                        | 0                                                              | 0                       |
| 9                                                                      | 16                           |                                | 0                                                                        | 0                                                              | 0                       |
| 10                                                                     | 17                           |                                | 0                                                                        | 0                                                              | 0                       |
| 11                                                                     | 16                           |                                | 0                                                                        | 0                                                              | 0                       |
| 12                                                                     | 19                           |                                | 0                                                                        | 0                                                              | 0                       |
| 13                                                                     | 19                           |                                | 0                                                                        | 0                                                              | 0                       |
| 14                                                                     | 16                           |                                | 0                                                                        | 0                                                              | 0                       |
| 15                                                                     | 16                           |                                | 0                                                                        | 0                                                              | 0                       |
| 16                                                                     | 19                           |                                | 0                                                                        | 0                                                              | 0                       |
| 17                                                                     | 15                           |                                | 0                                                                        | 0                                                              | 0                       |
| 18                                                                     | 18                           |                                | 0                                                                        | 0                                                              | 0                       |
| 19                                                                     | 17                           |                                | 0                                                                        | 0                                                              | 0                       |
| 20                                                                     | 16                           |                                | 0                                                                        | 0                                                              | 0                       |
| 21                                                                     | 17                           |                                | 0                                                                        | 0                                                              | 0                       |
| 22                                                                     | 27                           |                                | 0                                                                        | 0                                                              | 0                       |
| 23                                                                     | 16                           |                                | 0                                                                        | 0                                                              | 0                       |
| 24                                                                     | 19                           |                                | 0                                                                        | 0                                                              | 0                       |
| 25                                                                     | 31                           |                                | 0                                                                        | 0                                                              | 0                       |
| 26                                                                     | 16                           |                                | 0                                                                        | 0                                                              | 0                       |
| 27                                                                     | 16                           |                                | 0                                                                        | 0                                                              | 0                       |
| 28                                                                     | 14                           |                                | 0                                                                        | 0                                                              | 0                       |
| 29                                                                     | 16                           |                                | 0                                                                        | 0                                                              | 0                       |
| 30                                                                     | 15                           |                                | 0                                                                        | 0                                                              | 0                       |
| <b>TOTAL</b>                                                           | <b>519</b>                   | <b>0</b>                       | <b>0</b>                                                                 | <b>0</b>                                                       | <b>0</b>                |
| <b>AVERAGE</b>                                                         | <b>17.3</b>                  | <b>0.0</b>                     | <b>0.0</b>                                                               | <b>0.0</b>                                                     | <b>0.0</b>              |
| <b>SEM</b>                                                             | <b>0.6</b>                   | <b>0.00</b>                    | <b>0.0</b>                                                               | <b>0.0</b>                                                     | <b>0.0</b>              |

| Wwc2-specific siRNA (10 $\mu$ M), 2in2 micro-injection, 16-cell (E3.0) stage |                              |                                |                                                                          |                                                                |                         |
|------------------------------------------------------------------------------|------------------------------|--------------------------------|--------------------------------------------------------------------------|----------------------------------------------------------------|-------------------------|
| #                                                                            | Total cell number per embryo | Total number of dividing cells | Number of cells exhibiting an atypical/ unusual phenotype morphology     |                                                                |                         |
|                                                                              |                              |                                | Abnormal nuclear morphology (e.g. non-spheroidal or mid-body associated) | Defective cytokinesis (i.e. >x2 equally sized nuclei per cell) | Presence of micronuclei |
| 1                                                                            | 8                            |                                | 0                                                                        | 0                                                              | 0                       |
| 2                                                                            | 9                            |                                | 1                                                                        | 0                                                              | 0                       |
| 3                                                                            | 8                            |                                | 1                                                                        | 0                                                              | 0                       |
| 4                                                                            | 8                            |                                | 0                                                                        | 1                                                              | 0                       |
| 5                                                                            | 8                            |                                | 0                                                                        | 0                                                              | 3                       |
| 6                                                                            | 8                            |                                | 0                                                                        | 0                                                              | 0                       |
| 7                                                                            | 8                            |                                | 0                                                                        | 0                                                              | 1                       |
| 8                                                                            | 10                           |                                | 0                                                                        | 0                                                              | 0                       |
| 9                                                                            | 9                            |                                | 2                                                                        | 0                                                              | 1                       |
| 10                                                                           | 8                            |                                | 0                                                                        | 0                                                              | 0                       |
| 11                                                                           | 9                            |                                | 1                                                                        | 1                                                              | 0                       |
| 12                                                                           | 8                            |                                | 1                                                                        | 0                                                              | 0                       |
| 13                                                                           | 8                            |                                | 1                                                                        | 0                                                              | 1                       |
| 14                                                                           | 10                           |                                | 0                                                                        | 0                                                              | 0                       |
| 15                                                                           | 14                           |                                | 0                                                                        | 0                                                              | 0                       |
| 16                                                                           | 8                            |                                | 0                                                                        | 0                                                              | 0                       |
| 17                                                                           | 8                            |                                | 0                                                                        | 1                                                              | 1                       |
| 18                                                                           | 8                            |                                | 2                                                                        | 0                                                              | 1                       |
| 19                                                                           | 8                            |                                | 2                                                                        | 0                                                              | 0                       |
| 20                                                                           | 12                           |                                | 2                                                                        | 1                                                              | 2                       |
| 21                                                                           | 6                            |                                | 1                                                                        | 0                                                              | 0                       |
| 22                                                                           | 10                           |                                | 1                                                                        | 1                                                              | 1                       |
| 23                                                                           | 5                            |                                | 1                                                                        | 0                                                              | 0                       |
| 24                                                                           | 5                            |                                | 0                                                                        | 0                                                              | 2                       |
| 25                                                                           | 10                           |                                | 1                                                                        | 0                                                              | 2                       |
| 26                                                                           | 7                            |                                | 0                                                                        | 0                                                              | 1                       |
| 27                                                                           | 14                           |                                | 1                                                                        | 1                                                              | 3                       |
| 28                                                                           | 10                           |                                | 2                                                                        | 1                                                              | 2                       |
| 29                                                                           | 8                            |                                | 1                                                                        | 0                                                              | 0                       |
| 30                                                                           | 8                            |                                | 1                                                                        | 0                                                              | 0                       |
| 31                                                                           | 8                            |                                | 0                                                                        | 0                                                              | 0                       |
| <b>TOTAL</b>                                                                 | <b>268</b>                   | <b>0</b>                       | <b>22</b>                                                                | <b>7</b>                                                       | <b>21</b>               |
| <b>AVERAGE</b>                                                               | <b>8.6</b>                   | <b>0.0</b>                     | <b>0.7</b>                                                               | <b>0.2</b>                                                     | <b>0.7</b>              |
| <b>SEM</b>                                                                   | <b>0.4</b>                   | <b>0.0</b>                     | <b>0.1</b>                                                               | <b>0.1</b>                                                     | <b>0.2</b>              |
| Stat. sig. (exp. vs. con embryo) *p<0.05, **p<0.005                          | **                           |                                | **                                                                       | *                                                              | **                      |
| p-value (2-tailed students t-test)                                           | 3.00E-17                     | 0.00E+00                       | 2.11E-06                                                                 | 5.10E-03                                                       | 2.28E-04                |

| Control siRNA (10µM), 2in2 micro-injection, 32-cell (E3.5) stage |                              |                                |                                                                          |                                                               |                         |
|------------------------------------------------------------------|------------------------------|--------------------------------|--------------------------------------------------------------------------|---------------------------------------------------------------|-------------------------|
| #                                                                | Total cell number per embryo | Total number of dividing cells | Number of cells exhibiting an atypical/ unusual phenotype morphology     |                                                               |                         |
|                                                                  |                              |                                | Abnormal nuclear morphology (e.g. non-spheroidal or mid-body associated) | Defective cytokinesis (i.e. >2 equally sized nuclei per cell) | Presence of micronuclei |
| 1                                                                | 33                           |                                | 0                                                                        | 0                                                             | 0                       |
| 2                                                                | 24                           |                                | 0                                                                        | 0                                                             | 0                       |
| 3                                                                | 28                           |                                | 0                                                                        | 0                                                             | 0                       |
| 4                                                                | 31                           |                                | 0                                                                        | 0                                                             | 0                       |
| 5                                                                | 31                           |                                | 0                                                                        | 0                                                             | 0                       |
| 6                                                                | 38                           |                                | 0                                                                        | 0                                                             | 0                       |
| 7                                                                | 32                           |                                | 0                                                                        | 0                                                             | 0                       |
| 8                                                                | 31                           |                                | 0                                                                        | 0                                                             | 0                       |
| 9                                                                | 35                           |                                | 0                                                                        | 0                                                             | 0                       |
| 10                                                               | 31                           |                                | 0                                                                        | 0                                                             | 0                       |
| 11                                                               | 31                           |                                | 0                                                                        | 0                                                             | 0                       |
| 12                                                               | 34                           |                                | 0                                                                        | 0                                                             | 0                       |
| 13                                                               | 32                           |                                | 0                                                                        | 0                                                             | 0                       |
| 14                                                               | 22                           |                                | 0                                                                        | 0                                                             | 0                       |
| 15                                                               | 24                           |                                | 0                                                                        | 0                                                             | 0                       |
| 16                                                               | 35                           |                                | 0                                                                        | 0                                                             | 0                       |
| 17                                                               | 32                           |                                | 0                                                                        | 0                                                             | 0                       |
| 18                                                               | 38                           |                                | 0                                                                        | 0                                                             | 0                       |
| 19                                                               | 36                           |                                | 0                                                                        | 0                                                             | 0                       |
| 20                                                               | 37                           |                                | 0                                                                        | 0                                                             | 0                       |
| 21                                                               | 32                           |                                | 0                                                                        | 0                                                             | 0                       |
| 22                                                               | 42                           |                                | 0                                                                        | 0                                                             | 0                       |
| 23                                                               | 32                           |                                | 0                                                                        | 0                                                             | 0                       |
| 24                                                               | 29                           |                                | 0                                                                        | 0                                                             | 0                       |
| 25                                                               | 32                           |                                | 0                                                                        | 0                                                             | 0                       |
| 26                                                               | 32                           |                                | 0                                                                        | 0                                                             | 0                       |
| 27                                                               | 32                           |                                | 0                                                                        | 0                                                             | 0                       |
| 28                                                               | 31                           |                                | 0                                                                        | 0                                                             | 1                       |
| 29                                                               | 26                           |                                | 0                                                                        | 0                                                             | 0                       |
| 30                                                               | 28                           |                                | 0                                                                        | 0                                                             | 0                       |
| 31                                                               | 37                           |                                | 0                                                                        | 0                                                             | 0                       |
| 32                                                               | 36                           |                                | 0                                                                        | 0                                                             | 0                       |
| 33                                                               | 37                           |                                | 0                                                                        | 0                                                             | 0                       |
| 34                                                               | 35                           |                                | 0                                                                        | 0                                                             | 0                       |
| 35                                                               | 33                           |                                | 0                                                                        | 0                                                             | 0                       |
| 36                                                               | 37                           |                                | 0                                                                        | 0                                                             | 0                       |
| 37                                                               | 42                           |                                | 0                                                                        | 0                                                             | 0                       |
| 38                                                               | 40                           |                                | 0                                                                        | 0                                                             | 0                       |
| 39                                                               | 36                           |                                | 0                                                                        | 0                                                             | 0                       |
| 40                                                               | 37                           |                                | 0                                                                        | 0                                                             | 0                       |
| 41                                                               | 33                           |                                | 0                                                                        | 0                                                             | 0                       |
| 42                                                               | 30                           |                                | 0                                                                        | 0                                                             | 0                       |
| 43                                                               | 33                           |                                | 0                                                                        | 0                                                             | 0                       |
| 44                                                               | 37                           |                                | 0                                                                        | 0                                                             | 0                       |
| 45                                                               | 38                           |                                | 0                                                                        | 0                                                             | 0                       |
| 46                                                               | 30                           |                                | 0                                                                        | 0                                                             | 0                       |
| 47                                                               | 34                           |                                | 0                                                                        | 0                                                             | 0                       |
| 48                                                               | 38                           |                                | 0                                                                        | 0                                                             | 0                       |
| 49                                                               | 37                           |                                | 0                                                                        | 0                                                             | 0                       |
| <b>TOTAL</b>                                                     | <b>1491</b>                  | <b>0</b>                       | <b>0</b>                                                                 | <b>0</b>                                                      | <b>1</b>                |
| <b>AVERAGE</b>                                                   | <b>30.2</b>                  | <b>0.0</b>                     | <b>0.0</b>                                                               | <b>0.0</b>                                                    | <b>0.0</b>              |
| <b>SEM</b>                                                       | <b>0.6</b>                   | <b>0.0</b>                     | <b>0.0</b>                                                               | <b>0.0</b>                                                    | <b>0.0</b>              |

| Kibra siRNA (10µM), 2in2 micro-injection, 32-cell (E3.5) stage |                              |                                |                                                                          |                                                               |                         |
|----------------------------------------------------------------|------------------------------|--------------------------------|--------------------------------------------------------------------------|---------------------------------------------------------------|-------------------------|
| #                                                              | Total cell number per embryo | Total number of dividing cells | Number of cells exhibiting an atypical/ unusual phenotype morphology     |                                                               |                         |
|                                                                |                              |                                | Abnormal nuclear morphology (e.g. non-spheroidal or mid-body associated) | Defective cytokinesis (i.e. >2 equally sized nuclei per cell) | Presence of micronuclei |
| 1                                                              | 35                           |                                | 0                                                                        | 0                                                             | 0                       |
| 2                                                              | 32                           |                                | 0                                                                        | 0                                                             | 0                       |
| 3                                                              | 32                           |                                | 0                                                                        | 0                                                             | 0                       |
| 4                                                              | 31                           |                                | 0                                                                        | 0                                                             | 0                       |
| 5                                                              | 36                           |                                | 0                                                                        | 0                                                             | 0                       |
| 6                                                              | 35                           |                                | 0                                                                        | 0                                                             | 0                       |
| 7                                                              | 35                           |                                | 0                                                                        | 0                                                             | 0                       |
| 8                                                              | 33                           |                                | 0                                                                        | 0                                                             | 0                       |
| 9                                                              | 39                           |                                | 0                                                                        | 0                                                             | 0                       |
| 10                                                             | 35                           |                                | 0                                                                        | 0                                                             | 0                       |
| 11                                                             | 36                           |                                | 0                                                                        | 0                                                             | 0                       |
| 12                                                             | 34                           |                                | 0                                                                        | 0                                                             | 0                       |
| 13                                                             | 37                           |                                | 0                                                                        | 0                                                             | 0                       |
| 14                                                             | 40                           |                                | 0                                                                        | 0                                                             | 0                       |
| 15                                                             | 37                           |                                | 0                                                                        | 0                                                             | 0                       |
| 16                                                             | 33                           |                                | 0                                                                        | 0                                                             | 0                       |
| 17                                                             | 34                           |                                | 0                                                                        | 0                                                             | 0                       |
| 18                                                             | 37                           |                                | 0                                                                        | 0                                                             | 0                       |
| 19                                                             | 38                           |                                | 0                                                                        | 0                                                             | 0                       |
| 20                                                             | 38                           |                                | 0                                                                        | 0                                                             | 0                       |
| 21                                                             | 33                           |                                | 0                                                                        | 0                                                             | 0                       |
| 22                                                             | 34                           |                                | 0                                                                        | 0                                                             | 0                       |
| 23                                                             | 36                           |                                | 0                                                                        | 0                                                             | 0                       |
| <b>TOTAL</b>                                                   | <b>810</b>                   | <b>0</b>                       | <b>0</b>                                                                 | <b>0</b>                                                      | <b>0</b>                |
| <b>AVERAGE</b>                                                 | <b>35.2</b>                  | <b>0.0</b>                     | <b>0.0</b>                                                               | <b>0.0</b>                                                    | <b>0.0</b>              |
| <b>SEM</b>                                                     | <b>0.5</b>                   | <b>0.0</b>                     | <b>0.0</b>                                                               | <b>0.0</b>                                                    | <b>0.0</b>              |
| Stat. sig. (exp. vs. con embryo) *p<0.05, **p<0.005            |                              |                                |                                                                          |                                                               |                         |
| p-value (2-tailed students t-test)                             | 5.02E-02                     | 0.00E+00                       | 0.00E+00                                                                 | 0.00E+00                                                      | 4.97E-01                |

| Wwc2-specific siRNA (10µM), 2in2 micro-injection, 32-cell (E3.5) stage |                              |                                |                                                                          |                                                               |                         |
|------------------------------------------------------------------------|------------------------------|--------------------------------|--------------------------------------------------------------------------|---------------------------------------------------------------|-------------------------|
| #                                                                      | Total cell number per embryo | Total number of dividing cells | Number of cells exhibiting an atypical/ unusual phenotype morphology     |                                                               |                         |
|                                                                        |                              |                                | Abnormal nuclear morphology (e.g. non-spheroidal or mid-body associated) | Defective cytokinesis (i.e. >2 equally sized nuclei per cell) | Presence of micronuclei |
| 1                                                                      | 7                            |                                | 0                                                                        | 0                                                             | 3                       |
| 2                                                                      | 15                           |                                | 0                                                                        | 0                                                             | 0                       |
| 3                                                                      | 7                            |                                | 0                                                                        | 0                                                             | 3                       |
| 4                                                                      | 14                           |                                | 0                                                                        | 0                                                             | 0                       |
| 5                                                                      | 6                            |                                | 1                                                                        | 0                                                             | 1                       |
| 6                                                                      | 7                            |                                | 1                                                                        | 0                                                             | 1                       |
| 7                                                                      | 8                            |                                | 1                                                                        | 1                                                             | 0                       |
| 8                                                                      | 7                            |                                | 0                                                                        | 0                                                             | 0                       |
| 9                                                                      | 7                            |                                | 0                                                                        | 0                                                             | 1                       |
| 10                                                                     | 8                            |                                | 0                                                                        | 0                                                             | 1                       |
| 11                                                                     | 8                            |                                | 2                                                                        | 0                                                             | 3                       |
| 12                                                                     | 12                           |                                | 0                                                                        | 0                                                             | 0                       |
| 13                                                                     | 12                           |                                | 0                                                                        | 0                                                             | 1                       |
| 14                                                                     | 7                            |                                | 1                                                                        | 0                                                             | 0                       |
| 15                                                                     | 9                            |                                | 0                                                                        | 0                                                             | 4                       |
| 16                                                                     | 10                           |                                | 1                                                                        | 0                                                             | 2                       |
| 17                                                                     | 7                            |                                | 0                                                                        | 0                                                             | 2                       |
| 18                                                                     | 7                            |                                | 0                                                                        | 0                                                             | 0                       |
| 19                                                                     | 16                           |                                | 0                                                                        | 0                                                             | 0                       |
| 20                                                                     | 9                            |                                | 0                                                                        | 1                                                             | 2                       |
| 21                                                                     | 12                           |                                | 2                                                                        | 1                                                             | 3                       |
| 22                                                                     | 16                           |                                | 1                                                                        | 2                                                             | 6                       |
| 23                                                                     | 13                           |                                | 4                                                                        | 1                                                             | 4                       |
| 24                                                                     | 6                            |                                | 2                                                                        | 1                                                             | 0                       |
| 25                                                                     | 17                           |                                | 1                                                                        | 0                                                             | 0                       |
| 26                                                                     | 9                            |                                | 1                                                                        | 0                                                             | 2                       |
| 27                                                                     | 8                            |                                | 0                                                                        | 0                                                             | 0                       |
| 28                                                                     | 8                            |                                | 0                                                                        | 1                                                             | 4                       |
| 29                                                                     | 8                            |                                | 2                                                                        | 0                                                             | 0                       |
| 30                                                                     | 8                            |                                | 1                                                                        | 0                                                             | 0                       |
| 31                                                                     | 11                           |                                | 0                                                                        | 0                                                             | 0                       |
| 32                                                                     | 6                            |                                | 0                                                                        | 0                                                             | 2                       |
| 33                                                                     | 12                           |                                | 1                                                                        | 0                                                             | 1                       |
| 34                                                                     | 7                            |                                | 0                                                                        | 0                                                             | 1                       |
| 35                                                                     | 15                           |                                | 0                                                                        | 0                                                             | 2                       |
| 36                                                                     | 8                            |                                | 0                                                                        | 0                                                             | 0                       |
| <b>TOTAL</b>                                                           | <b>347</b>                   | <b>0</b>                       | <b>22</b>                                                                | <b>9</b>                                                      | <b>49</b>               |
| <b>AVERAGE</b>                                                         | <b>9.6</b>                   | <b>0.0</b>                     | <b>0.6</b>                                                               | <b>0.3</b>                                                    | <b>1.4</b>              |
| <b>SEM</b>                                                             | <b>0.5</b>                   | <b>0.0</b>                     | <b>0.2</b>                                                               | <b>0.1</b>                                                    | <b>0.3</b>              |
| Stat. sig. (exp. vs. con embryo) *p<0.05, **p<0.005                    | **                           | **                             | **                                                                       | **                                                            | **                      |
| p-value (2-tailed students t-test)                                     | 2.23E-43                     | 0.00E+00                       | 8.54E-06                                                                 | 7.33E-04                                                      | 4.46E-08                |
| Stat. sig. (exp. vs. exp Kibra KD embryo) §p<0.05, §§p<0.005           | §§                           | §§                             | §§                                                                       | §                                                             | §§                      |
| p-value (2-tailed students t-test)                                     | 1.65E-38                     | 0.00E+00                       | 2.03E-03                                                                 | 2.02E-02                                                      | 9.72E-05                |

| Control siRNA (10 $\mu$ M), 2in2 micro-injection, ~64-cell (E4.0) stage |                              |                                |                                                                          |                                                                |                         |
|-------------------------------------------------------------------------|------------------------------|--------------------------------|--------------------------------------------------------------------------|----------------------------------------------------------------|-------------------------|
| #                                                                       | Total cell number per embryo | Total number of dividing cells | Number of cells exhibiting an atypical/ unusual phenotype morphology     |                                                                |                         |
|                                                                         |                              |                                | Abnormal nuclear morphology (e.g. non-spheroidal or mid-body associated) | Defective cytokinesis (i.e. >x2 equally sized nuclei per cell) | Presence of micronuclei |
| 1                                                                       | 60                           | 3                              | 0                                                                        | 0                                                              | 0                       |
| 2                                                                       | 68                           | 4                              | 0                                                                        | 0                                                              | 0                       |
| 3                                                                       | 68                           | 8                              | 0                                                                        | 0                                                              | 0                       |
| 4                                                                       | 72                           | 3                              | 0                                                                        | 0                                                              | 0                       |
| 5                                                                       | 64                           | 1                              | 0                                                                        | 0                                                              | 0                       |
| 6                                                                       | 70                           | 0                              | 0                                                                        | 0                                                              | 0                       |
| 7                                                                       | 62                           | 5                              | 0                                                                        | 0                                                              | 0                       |
| 8                                                                       | 68                           | 4                              | 0                                                                        | 0                                                              | 0                       |
| 9                                                                       | 60                           | 3                              | 0                                                                        | 0                                                              | 0                       |
| 10                                                                      | 66                           | 5                              | 0                                                                        | 0                                                              | 0                       |
| 11                                                                      | 72                           | 2                              | 0                                                                        | 0                                                              | 0                       |
| 12                                                                      | 64                           | 1                              | 0                                                                        | 0                                                              | 0                       |
| 13                                                                      | 68                           | 3                              | 0                                                                        | 0                                                              | 0                       |
| 14                                                                      | 60                           | 2                              | 0                                                                        | 0                                                              | 0                       |
| 15                                                                      | 70                           | 1                              | 0                                                                        | 0                                                              | 0                       |
| 16                                                                      | 66                           | 3                              | 0                                                                        | 0                                                              | 0                       |
| <b>TOTAL</b>                                                            | <b>1058</b>                  | <b>48</b>                      | <b>0</b>                                                                 | <b>0</b>                                                       | <b>0</b>                |
| <b>AVERAGE</b>                                                          | <b>66.1</b>                  | <b>3.0</b>                     | <b>0.0</b>                                                               | <b>0.0</b>                                                     | <b>0.0</b>              |
| <b>SEM</b>                                                              | <b>1.0</b>                   | <b>0.5</b>                     | <b>0.0</b>                                                               | <b>0.0</b>                                                     | <b>0.0</b>              |

| Wwc2-specific siRNA (10 $\mu$ M), 2in2 micro-injection, ~64-cell (E4.0) stage |                              |                                |                                                                          |                                                                |                         |
|-------------------------------------------------------------------------------|------------------------------|--------------------------------|--------------------------------------------------------------------------|----------------------------------------------------------------|-------------------------|
| #                                                                             | Total cell number per embryo | Total number of dividing cells | Number of cells exhibiting an atypical/ unusual phenotype morphology     |                                                                |                         |
|                                                                               |                              |                                | Abnormal nuclear morphology (e.g. non-spheroidal or mid-body associated) | Defective cytokinesis (i.e. >x2 equally sized nuclei per cell) | Presence of micronuclei |
| 1                                                                             | 34                           | 0                              | 2                                                                        | 0                                                              | 7                       |
| 2                                                                             | 24                           | 1                              | 3                                                                        | 0                                                              | 9                       |
| 3                                                                             | 22                           | 2                              | 1                                                                        | 0                                                              | 4                       |
| 4                                                                             | 24                           | 2                              | 2                                                                        | 0                                                              | 3                       |
| 5                                                                             | 18                           | 0                              | 3                                                                        | 0                                                              | 2                       |
| 6                                                                             | 21                           | 0                              | 4                                                                        | 0                                                              | 3                       |
| 7                                                                             | 20                           | 0                              | 3                                                                        | 0                                                              | 3                       |
| 8                                                                             | 29                           | 1                              | 2                                                                        | 0                                                              | 8                       |
| 9                                                                             | 16                           | 0                              | 4                                                                        | 0                                                              | 4                       |
| 10                                                                            | 18                           | 0                              | 2                                                                        | 0                                                              | 4                       |
| 11                                                                            | 23                           | 0                              | 1                                                                        | 0                                                              | 5                       |
| 12                                                                            | 16                           | 0                              | 4                                                                        | 0                                                              | 8                       |
| 13                                                                            | 18                           | 3                              | 2                                                                        | 0                                                              | 4                       |
| 14                                                                            | 22                           | 2                              | 3                                                                        | 0                                                              | 6                       |
| 15                                                                            | 16                           | 0                              | 4                                                                        | 2                                                              | 3                       |
| 16                                                                            | 23                           | 1                              | 2                                                                        | 0                                                              | 3                       |
| 17                                                                            | 20                           | 0                              | 4                                                                        | 0                                                              | 7                       |
| 18                                                                            | 24                           | 0                              | 3                                                                        | 0                                                              | 5                       |
| <b>TOTAL</b>                                                                  | <b>388</b>                   | <b>12</b>                      | <b>49</b>                                                                | <b>2</b>                                                       | <b>88</b>               |
| <b>AVERAGE</b>                                                                | <b>21.6</b>                  | <b>0.7</b>                     | <b>2.7</b>                                                               | <b>0.1</b>                                                     | <b>4.9</b>              |
| <b>SEM</b>                                                                    | <b>1.1</b>                   | <b>0.2</b>                     | <b>0.2</b>                                                               | <b>0.1</b>                                                     | <b>0.5</b>              |
| Stat. sig. (exp. vs. con embryo) *p<0.05, **p<0.005                           | <b>**</b>                    | <b>**</b>                      | <b>**</b>                                                                |                                                                | <b>**</b>               |
| p-value (2-tailed students t-test)                                            | 9.26E-25                     | 9.32E-05                       | 4.43E-12                                                                 | 3.54E-01                                                       | 1.49E-10                |

| Control siRNA (10 $\mu$ M), 2in2 micro-injection, >64-cell (E4.5) stage |                              |                                |                                                                          |                                                                |                         |
|-------------------------------------------------------------------------|------------------------------|--------------------------------|--------------------------------------------------------------------------|----------------------------------------------------------------|-------------------------|
| #                                                                       | Total cell number per embryo | Total number of dividing cells | Number of cells exhibiting an atypical/ unusual phenotype morphology     |                                                                |                         |
|                                                                         |                              |                                | Abnormal nuclear morphology (e.g. non-spheroidal or mid-body associated) | Defective cytokinesis (i.e. >x2 equally sized nuclei per cell) | Presence of micronuclei |
| 1                                                                       | 81                           | 4                              | 0                                                                        | 0                                                              | 0                       |
| 2                                                                       | 76                           | 2                              | 0                                                                        | 0                                                              | 0                       |
| 3                                                                       | 67                           | 8                              | 0                                                                        | 0                                                              | 0                       |
| 4                                                                       | 77                           | 4                              | 0                                                                        | 0                                                              | 0                       |
| 5                                                                       | 110                          | 5                              | 0                                                                        | 0                                                              | 0                       |
| 6                                                                       | 107                          | 6                              | 0                                                                        | 0                                                              | 0                       |
| 7                                                                       | 76                           | 5                              | 0                                                                        | 0                                                              | 0                       |
| 8                                                                       | 94                           | 4                              | 0                                                                        | 0                                                              | 0                       |
| 9                                                                       | 102                          | 1                              | 0                                                                        | 0                                                              | 0                       |
| 10                                                                      | 108                          | 7                              | 0                                                                        | 0                                                              | 0                       |
| 11                                                                      | 85                           | 5                              | 0                                                                        | 0                                                              | 0                       |
| 12                                                                      | 73                           | 4                              | 0                                                                        | 0                                                              | 0                       |
| 13                                                                      | 82                           | 7                              | 0                                                                        | 0                                                              | 0                       |
| 14                                                                      | 80                           | 5                              | 0                                                                        | 0                                                              | 0                       |
| <b>TOTAL</b>                                                            | <b>1218</b>                  | <b>67</b>                      | <b>0</b>                                                                 | <b>0</b>                                                       | <b>0</b>                |
| <b>AVERAGE</b>                                                          | <b>87.0</b>                  | <b>4.8</b>                     | <b>0.0</b>                                                               | <b>0.0</b>                                                     | <b>0.0</b>              |
| <b>SEM</b>                                                              | <b>3.8</b>                   | <b>0.5</b>                     | <b>0.0</b>                                                               | <b>0.0</b>                                                     | <b>0.0</b>              |

| Wwc2-specific siRNA (10 $\mu$ M), 2in2 micro-injection, >64-cell (E4.5) stage |                              |                                |                                                                          |                                                                |                         |
|-------------------------------------------------------------------------------|------------------------------|--------------------------------|--------------------------------------------------------------------------|----------------------------------------------------------------|-------------------------|
| #                                                                             | Total cell number per embryo | Total number of dividing cells | Number of cells exhibiting an atypical/ unusual phenotype morphology     |                                                                |                         |
|                                                                               |                              |                                | Abnormal nuclear morphology (e.g. non-spheroidal or mid-body associated) | Defective cytokinesis (i.e. >x2 equally sized nuclei per cell) | Presence of micronuclei |
| 1                                                                             | 13                           | 0                              | 6                                                                        | 1                                                              | 6                       |
| 2                                                                             | 57                           | 7                              | 7                                                                        | 1                                                              | 5                       |
| 3                                                                             | 31                           | 3                              | 5                                                                        | 0                                                              | 7                       |
| 4                                                                             | 13                           | 1                              | 2                                                                        | 0                                                              | 2                       |
| 5                                                                             | 21                           | 6                              | 4                                                                        | 0                                                              | 5                       |
| 6                                                                             | 28                           | 2                              | 4                                                                        | 0                                                              | 4                       |
| 7                                                                             | 30                           | 3                              | 5                                                                        | 0                                                              | 3                       |
| 8                                                                             | 28                           | 2                              | 4                                                                        | 0                                                              | 3                       |
| 9                                                                             | 36                           | 1                              | 3                                                                        | 1                                                              | 6                       |
| 10                                                                            | 26                           | 5                              | 2                                                                        | 0                                                              | 2                       |
| 11                                                                            | 51                           | 5                              | 4                                                                        | 0                                                              | 4                       |
| 12                                                                            | 35                           | 3                              | 2                                                                        | 0                                                              | 7                       |
| 13                                                                            | 45                           | 3                              | 5                                                                        | 0                                                              | 3                       |
| 14                                                                            | 32                           | 3                              | 3                                                                        | 0                                                              | 4                       |
| 15                                                                            | 44                           | 4                              | 4                                                                        | 0                                                              | 4                       |
| 16                                                                            | 19                           | 3                              | 3                                                                        | 0                                                              | 2                       |
| 17                                                                            | 23                           | 5                              | 2                                                                        | 1                                                              | 3                       |
| <b>TOTAL</b>                                                                  | <b>532</b>                   | <b>56</b>                      | <b>65</b>                                                                | <b>4</b>                                                       | <b>70</b>               |
| <b>AVERAGE</b>                                                                | <b>31.3</b>                  | <b>3.3</b>                     | <b>3.8</b>                                                               | <b>0.2</b>                                                     | <b>4.1</b>              |
| <b>SEM</b>                                                                    | <b>3.0</b>                   | <b>0.5</b>                     | <b>0.4</b>                                                               | <b>0.1</b>                                                     | <b>0.4</b>              |
| Stat. sig. (exp. vs. con embryo) *p<0.05, **p<0.005                           | **                           | *                              | **                                                                       |                                                                | **                      |
| p-value (2-tailed students t-test)                                            | 2.27E-12                     | 3.55E-02                       | 1.26E-10                                                                 | 5.41E-02                                                       | 3.44E-10                |

Supplementary Tables ST7

| Control siRNA (10 $\mu$ M), 1in2 micro-injection, 4-cell (E2.0) stage |                              |                         |                             |                                  |                                      |                                |
|-----------------------------------------------------------------------|------------------------------|-------------------------|-----------------------------|----------------------------------|--------------------------------------|--------------------------------|
| #                                                                     | Total cell number per embryo | Cells in injected clone | Cells in non-injected clone | Dividing cells in injected clone | Dividing cells in non-injected clone | Total number of dividing cells |
| 1                                                                     | 4                            | 2                       | 2                           | 0                                | 0                                    | 0                              |
| 2                                                                     | 4                            | 2                       | 2                           | 0                                | 0                                    | 0                              |
| 3                                                                     | 6                            | 3                       | 3                           | 0                                | 1                                    | 1                              |
| 4                                                                     | 5                            | 3                       | 2                           | 0                                | 1                                    | 1                              |
| 5                                                                     | 4                            | 2                       | 2                           | 0                                | 0                                    | 0                              |
| 6                                                                     | 4                            | 2                       | 2                           | 1                                | 1                                    | 2                              |
| 7                                                                     | 5                            | 2                       | 3                           | 1                                | 0                                    | 1                              |
| 8                                                                     | 4                            | 2                       | 2                           | 1                                | 1                                    | 2                              |
| 9                                                                     | 6                            | 3                       | 3                           | 1                                | 1                                    | 2                              |
| 10                                                                    | 4                            | 2                       | 2                           | 0                                | 0                                    | 0                              |
| 11                                                                    | 5                            | 2                       | 3                           | 1                                | 0                                    | 1                              |
| 12                                                                    | 4                            | 2                       | 2                           | 0                                | 0                                    | 0                              |
| <b>TOTAL</b>                                                          | <b>55</b>                    | <b>27</b>               | <b>28</b>                   | <b>5</b>                         | <b>5</b>                             | <b>10</b>                      |
| <b>AVERAGE</b>                                                        | <b>4.6</b>                   | <b>2.3</b>              | <b>2.3</b>                  | <b>0.4</b>                       | <b>0.4</b>                           | <b>0.8</b>                     |
| <b>SEM</b>                                                            | <b>0.2</b>                   | <b>0.1</b>              | <b>0.1</b>                  | <b>0.1</b>                       | <b>0.1</b>                           | <b>0.2</b>                     |
| Stat. sig. (inter-clone) #p<0.05, ##p<0.005                           |                              |                         |                             |                                  |                                      |                                |
| p-value (2-tailed students t-test)                                    |                              | 6.70E-01                |                             | 1.00E+00                         |                                      |                                |

| Wwc2-specific siRNA (10 $\mu$ M), 1in2 micro-injection, 4-cell (E2.0) stage |                              |                         |                             |                                  |                                      |                                |
|-----------------------------------------------------------------------------|------------------------------|-------------------------|-----------------------------|----------------------------------|--------------------------------------|--------------------------------|
| #                                                                           | Total cell number per embryo | Cells in injected clone | Cells in non-injected clone | Dividing cells in injected clone | Dividing cells in non-injected clone | Total number of dividing cells |
| 1                                                                           | 4                            | 2                       | 2                           | 0                                | 1                                    | 1                              |
| 2                                                                           | 4                            | 2                       | 2                           | 0                                | 0                                    | 0                              |
| 3                                                                           | 5                            | 3                       | 2                           | 0                                | 1                                    | 1                              |
| 4                                                                           | 4                            | 2                       | 2                           | 0                                | 0                                    | 0                              |
| 5                                                                           | 4                            | 2                       | 2                           | 0                                | 1                                    | 1                              |
| 6                                                                           | 4                            | 2                       | 2                           | 0                                | 0                                    | 0                              |
| 7                                                                           | 5                            | 2                       | 3                           | 0                                | 1                                    | 1                              |
| 8                                                                           | 4                            | 2                       | 2                           | 0                                | 1                                    | 1                              |
| 9                                                                           | 4                            | 2                       | 2                           | 0                                | 0                                    | 0                              |
| 10                                                                          | 4                            | 2                       | 2                           | 0                                | 0                                    | 0                              |
| 11                                                                          | 5                            | 2                       | 3                           | 0                                | 0                                    | 0                              |
| 12                                                                          | 4                            | 2                       | 2                           | 0                                | 0                                    | 0                              |
| 13                                                                          | 4                            | 2                       | 2                           | 0                                | 1                                    | 1                              |
| 14                                                                          | 5                            | 2                       | 3                           | 0                                | 0                                    | 0                              |
| 15                                                                          | 4                            | 2                       | 2                           | 0                                | 1                                    | 1                              |
| <b>TOTAL</b>                                                                | <b>64</b>                    | <b>31</b>               | <b>33</b>                   | <b>0</b>                         | <b>7</b>                             | <b>7</b>                       |
| <b>AVERAGE</b>                                                              | <b>4.3</b>                   | <b>2.1</b>              | <b>2.2</b>                  | <b>0.0</b>                       | <b>0.5</b>                           | <b>0.5</b>                     |
| <b>SEM</b>                                                                  | <b>0.1</b>                   | <b>0.1</b>              | <b>0.1</b>                  | <b>0.0</b>                       | <b>0.1</b>                           | <b>0.1</b>                     |
| Stat. sig. (inter-clone) #p<0.05, ##p<0.005                                 |                              |                         |                             | ##                               |                                      |                                |
| p-value (2-tailed students t-test)                                          |                              | 2.99E-01                |                             | 1.58E-03                         |                                      |                                |
| Stat. sig. (exp. vs. con embryo) *p<0.05, **p<0.005                         |                              |                         |                             | **                               |                                      |                                |
| p-value (2-tailed students t-test)                                          | 2.05E-01                     | 1.97E-01                | 4.52E-01                    | 4.20E-03                         | 8.04E-01                             | 1.73E-01                       |

Supplementary Tables ST8

| Control siRNA (10 $\mu$ M), 1in2 micro-injection, 8-cell (E2.5) stage |                              |                         |                             |                                  |                                      |                                |
|-----------------------------------------------------------------------|------------------------------|-------------------------|-----------------------------|----------------------------------|--------------------------------------|--------------------------------|
| #                                                                     | Total cell number per embryo | Cells in injected clone | Cells in non-injected clone | Dividing cells in injected clone | Dividing cells in non-injected clone | Total number of dividing cells |
| 1                                                                     | 8                            | 4                       | 4                           | 0                                | 0                                    | 0                              |
| 2                                                                     | 8                            | 4                       | 4                           | 0                                | 1                                    | 1                              |
| 3                                                                     | 8                            | 4                       | 4                           | 0                                | 1                                    | 1                              |
| 4                                                                     | 9                            | 4                       | 5                           | 0                                | 0                                    | 0                              |
| 5                                                                     | 8                            | 4                       | 4                           | 0                                | 0                                    | 0                              |
| 6                                                                     | 8                            | 4                       | 4                           | 1                                | 0                                    | 1                              |
| 7                                                                     | 8                            | 4                       | 4                           | 0                                | 0                                    | 0                              |
| 8                                                                     | 7                            | 4                       | 4                           | 0                                | 0                                    | 0                              |
| 9                                                                     | 8                            | 4                       | 4                           | 0                                | 1                                    | 1                              |
| 10                                                                    | 9                            | 4                       | 5                           | 1                                | 0                                    | 1                              |
| 11                                                                    | 8                            | 4                       | 4                           | 0                                | 1                                    | 1                              |
| 12                                                                    | 9                            | 4                       | 5                           | 0                                | 0                                    | 0                              |
| 13                                                                    | 8                            | 4                       | 4                           | 1                                | 0                                    | 1                              |
| <b>TOTAL</b>                                                          | <b>106</b>                   | <b>52</b>               | <b>55</b>                   | <b>3</b>                         | <b>4</b>                             | <b>7</b>                       |
| <b>AVERAGE</b>                                                        | <b>8.2</b>                   | <b>4.0</b>              | <b>4.2</b>                  | <b>0.2</b>                       | <b>0.3</b>                           | <b>0.5</b>                     |
| <b>SEM</b>                                                            | <b>0.2</b>                   | <b>0.0</b>              | <b>0.1</b>                  | <b>0.1</b>                       | <b>0.1</b>                           | <b>0.1</b>                     |
| Stat. sig. (inter-clone) †p<0.05, ††p<0.005                           |                              |                         |                             |                                  |                                      |                                |
| p-value (2-tailed students t-test)                                    |                              | 6.99E-02                |                             | 6.74E-01                         |                                      |                                |

| Wwc2-specific siRNA (10 $\mu$ M), 1in2 micro-injection, 8-cell (E2.5) stage |                              |                         |                             |                                  |                                      |                                |
|-----------------------------------------------------------------------------|------------------------------|-------------------------|-----------------------------|----------------------------------|--------------------------------------|--------------------------------|
| #                                                                           | Total cell number per embryo | Cells in injected clone | Cells in non-injected clone | Dividing cells in injected clone | Dividing cells in non-injected clone | Total number of dividing cells |
| 1                                                                           | 6                            | 2                       | 4                           | 0                                | 2                                    | 2                              |
| 2                                                                           | 5                            | 2                       | 3                           | 0                                | 1                                    | 1                              |
| 3                                                                           | 6                            | 2                       | 4                           | 0                                | 0                                    | 0                              |
| 4                                                                           | 6                            | 2                       | 4                           | 0                                | 0                                    | 0                              |
| 5                                                                           | 7                            | 3                       | 4                           | 0                                | 0                                    | 0                              |
| 6                                                                           | 7                            | 3                       | 4                           | 0                                | 1                                    | 1                              |
| 7                                                                           | 6                            | 2                       | 4                           | 1                                | 1                                    | 2                              |
| 8                                                                           | 6                            | 2                       | 4                           | 0                                | 1                                    | 1                              |
| 9                                                                           | 6                            | 2                       | 4                           | 0                                | 0                                    | 0                              |
| 10                                                                          | 8                            | 4                       | 4                           | 0                                | 1                                    | 1                              |
| 11                                                                          | 6                            | 2                       | 4                           | 0                                | 0                                    | 0                              |
| 12                                                                          | 7                            | 2                       | 5                           | 0                                | 0                                    | 0                              |
| 13                                                                          | 5                            | 2                       | 3                           | 0                                | 1                                    | 1                              |
| 14                                                                          | 6                            | 2                       | 4                           | 0                                | 0                                    | 0                              |
| 15                                                                          | 6                            | 2                       | 4                           | 0                                | 0                                    | 0                              |
| 16                                                                          | 6                            | 2                       | 4                           | 1                                | 2                                    | 3                              |
| 17                                                                          | 6                            | 2                       | 4                           | 0                                | 0                                    | 0                              |
| 18                                                                          | 6                            | 2                       | 4                           | 0                                | 0                                    | 0                              |
| 19                                                                          | 6                            | 2                       | 4                           | 0                                | 1                                    | 1                              |
| <b>TOTAL</b>                                                                | <b>117</b>                   | <b>42</b>               | <b>75</b>                   | <b>2</b>                         | <b>11</b>                            | <b>13</b>                      |
| <b>AVERAGE</b>                                                              | <b>6.2</b>                   | <b>2.2</b>              | <b>3.9</b>                  | <b>0.1</b>                       | <b>0.6</b>                           | <b>0.7</b>                     |
| <b>SEM</b>                                                                  | <b>0.2</b>                   | <b>0.1</b>              | <b>0.1</b>                  | <b>0.1</b>                       | <b>0.2</b>                           | <b>0.6</b>                     |
| Stat. sig. (inter-clone) †p<0.05, ††p<0.005                                 |                              | ††                      |                             | ‡                                |                                      |                                |
| p-value (2-tailed students t-test)                                          |                              | 2.25E-13                |                             | 1.01E-02                         |                                      |                                |
| Stat. sig. (exp. vs. con embryo) *p<0.05, **p<0.005                         | **                           | **                      |                             |                                  |                                      |                                |
| p-value (2-tailed students t-test)                                          | 1.08E-09                     | 5.70E-13                | 6.97E-02                    | 3.53E-01                         | 2.31E-01                             | 5.98E-01                       |



Supplementary Tables ST9

| <b>Control siRNA (10<math>\mu</math>M), 1in2 micro-injection, 16-cell (E3.0) stage</b> |                              |                         |                             |                                  |                                      |                                |
|----------------------------------------------------------------------------------------|------------------------------|-------------------------|-----------------------------|----------------------------------|--------------------------------------|--------------------------------|
| #                                                                                      | Total cell number per embryo | Cells in injected clone | Cells in non-injected clone | Dividing cells in injected clone | Dividing cells in non-injected clone | Total number of dividing cells |
| 1                                                                                      | 16                           | 8                       | 8                           | 0                                | 0                                    | 0                              |
| 2                                                                                      | 16                           | 8                       | 8                           | 0                                | 0                                    | 0                              |
| 3                                                                                      | 16                           | 8                       | 8                           | 0                                | 0                                    | 0                              |
| 4                                                                                      | 15                           | 7                       | 8                           | 0                                | 2                                    | 2                              |
| 5                                                                                      | 17                           | 8                       | 9                           | 1                                | 0                                    | 1                              |
| 6                                                                                      | 16                           | 8                       | 8                           | 0                                | 3                                    | 3                              |
| 7                                                                                      | 16                           | 8                       | 8                           | 0                                | 0                                    | 0                              |
| 8                                                                                      | 15                           | 8                       | 7                           | 0                                | 0                                    | 0                              |
| 9                                                                                      | 15                           | 7                       | 8                           | 0                                | 0                                    | 0                              |
| 10                                                                                     | 16                           | 8                       | 8                           | 0                                | 0                                    | 0                              |
| 11                                                                                     | 15                           | 7                       | 8                           | 0                                | 0                                    | 0                              |
| 12                                                                                     | 16                           | 8                       | 8                           | 1                                | 0                                    | 1                              |
| 13                                                                                     | 15                           | 8                       | 7                           | 1                                | 1                                    | 2                              |
| <b>TOTAL</b>                                                                           | <b>204</b>                   | <b>101</b>              | <b>103</b>                  | <b>3</b>                         | <b>6</b>                             | <b>9</b>                       |
| <b>AVERAGE</b>                                                                         | <b>15.7</b>                  | <b>7.8</b>              | <b>7.9</b>                  | <b>0.2</b>                       | <b>0.5</b>                           | <b>0.7</b>                     |
| <b>SEM</b>                                                                             | <b>0.2</b>                   | <b>0.1</b>              | <b>0.1</b>                  | <b>0.088</b>                     | <b>0.300</b>                         | <b>0.3</b>                     |
| Stat. sig. (inter-clone) †p<0.05, ††p<0.005                                            |                              |                         |                             |                                  |                                      |                                |
| p-value (2-tailed students t-test)                                                     |                              | 4.09E-01                |                             | 4.41E-01                         |                                      |                                |

| <b>Wwc2-specific siRNA (10<math>\mu</math>M), 1in2 micro-injection, 16-cell (E3.0) stage</b> |                              |                         |                             |                                  |                                      |                                |
|----------------------------------------------------------------------------------------------|------------------------------|-------------------------|-----------------------------|----------------------------------|--------------------------------------|--------------------------------|
| #                                                                                            | Total cell number per embryo | Cells in injected clone | Cells in non-injected clone | Dividing cells in injected clone | Dividing cells in non-injected clone | Total number of dividing cells |
| 1                                                                                            | 11                           | 4                       | 7                           | 0                                | 1                                    | 1                              |
| 2                                                                                            | 13                           | 5                       | 8                           | 1                                | 0                                    | 1                              |
| 3                                                                                            | 12                           | 4                       | 8                           | 0                                | 0                                    | 0                              |
| 4                                                                                            | 12                           | 4                       | 8                           | 0                                | 0                                    | 0                              |
| 5                                                                                            | 13                           | 5                       | 8                           | 0                                | 1                                    | 1                              |
| 6                                                                                            | 12                           | 3                       | 9                           | 0                                | 1                                    | 1                              |
| 7                                                                                            | 12                           | 4                       | 8                           | 0                                | 0                                    | 0                              |
| 8                                                                                            | 12                           | 4                       | 8                           | 0                                | 0                                    | 0                              |
| 9                                                                                            | 12                           | 4                       | 8                           | 1                                | 0                                    | 1                              |
| 10                                                                                           | 11                           | 4                       | 7                           | 0                                | 1                                    | 1                              |
| 11                                                                                           | 12                           | 4                       | 8                           | 0                                | 1                                    | 1                              |
| 12                                                                                           | 12                           | 4                       | 8                           | 0                                | 0                                    | 0                              |
| 13                                                                                           | 11                           | 4                       | 7                           | 0                                | 0                                    | 0                              |
| 14                                                                                           | 14                           | 6                       | 8                           | 1                                | 0                                    | 1                              |
| 15                                                                                           | 12                           | 4                       | 8                           | 0                                | 0                                    | 0                              |
| 16                                                                                           | 14                           | 4                       | 10                          | 0                                | 1                                    | 1                              |
| 17                                                                                           | 11                           | 3                       | 8                           | 0                                | 0                                    | 0                              |
| 18                                                                                           | 12                           | 4                       | 8                           | 1                                | 1                                    | 2                              |
| <b>TOTAL</b>                                                                                 | <b>218</b>                   | <b>74</b>               | <b>144</b>                  | <b>4</b>                         | <b>7</b>                             | <b>11</b>                      |
| <b>AVERAGE</b>                                                                               | <b>12.1</b>                  | <b>4.1</b>              | <b>8.0</b>                  | <b>0.2</b>                       | <b>0.4</b>                           | <b>0.6</b>                     |
| <b>SEM</b>                                                                                   | <b>0.2</b>                   | <b>0.2</b>              | <b>0.2</b>                  | <b>0.101</b>                     | <b>0.118</b>                         | <b>0.1</b>                     |
| Stat. sig. (inter-clone) †p<0.05, ††p<0.005                                                  |                              | ††                      |                             |                                  |                                      |                                |
| p-value (2-tailed students t-test)                                                           |                              | 2.73E-18                |                             | 2.91E-01                         |                                      |                                |
| Stat. sig. (exp. vs. con embryo) *p<0.05, **p<0.005                                          | **                           | **                      |                             |                                  |                                      |                                |
| p-value (2-tailed students t-test)                                                           | 4.93E-13                     | 1.19E-16                | 7.33E-01                    | 9.57E-01                         | 7.87E-01                             | 7.85E-01                       |

Supplementary Tables ST10

| Control siRNA (10µM), 1in2 micro-injection, 32-cell (E3.5) stage |                              |                         |                             |                                  |                                      |                                |
|------------------------------------------------------------------|------------------------------|-------------------------|-----------------------------|----------------------------------|--------------------------------------|--------------------------------|
| #                                                                | Total cell number per embryo | Cells in injected clone | Cells in non-injected clone | Dividing cells in injected clone | Dividing cells in non-injected clone | Total number of dividing cells |
| 1                                                                | 43                           | 22                      | 21                          | 3                                | 6                                    | 9                              |
| 2                                                                | 31                           | 16                      | 15                          | 0                                | 1                                    | 1                              |
| 3                                                                | 33                           | 16                      | 17                          | 0                                | 1                                    | 1                              |
| 4                                                                | 35                           | 17                      | 18                          | 6                                | 3                                    | 9                              |
| 5                                                                | 35                           | 16                      | 19                          | 3                                | 1                                    | 4                              |
| 6                                                                | 32                           | 16                      | 16                          | 0                                | 0                                    | 0                              |
| 7                                                                | 31                           | 15                      | 16                          | 1                                | 0                                    | 1                              |
| 8                                                                | 33                           | 16                      | 17                          | 0                                | 0                                    | 0                              |
| 9                                                                | 31                           | 16                      | 15                          | 0                                | 1                                    | 1                              |
| 10                                                               | 34                           | 16                      | 18                          | 0                                | 0                                    | 0                              |
| <b>TOTAL</b>                                                     | <b>338</b>                   | <b>166</b>              | <b>172</b>                  | <b>13</b>                        | <b>13</b>                            | <b>26</b>                      |
| <b>AVERAGE</b>                                                   | <b>33.8</b>                  | <b>16.6</b>             | <b>17.2</b>                 | <b>1.3</b>                       | <b>1.3</b>                           | <b>2.6</b>                     |
| <b>SEM</b>                                                       | <b>1.1</b>                   | <b>0.6</b>              | <b>0.6</b>                  | <b>0.7</b>                       | <b>0.6</b>                           | <b>1.1</b>                     |
| Stat. sig. (inter-clone) †p<0.05, ††p<0.005                      |                              |                         |                             |                                  |                                      |                                |
| p-value (2-tailed students t-test)                               |                              | 4.92E-01                |                             | 1.00E+00                         |                                      |                                |

| Wwc2-specific siRNA (10µM), 1in2 micro-injection, 32-cell (E3.5) stage |                              |                         |                             |                                  |                                      |                                |
|------------------------------------------------------------------------|------------------------------|-------------------------|-----------------------------|----------------------------------|--------------------------------------|--------------------------------|
| #                                                                      | Total cell number per embryo | Cells in injected clone | Cells in non-injected clone | Dividing cells in injected clone | Dividing cells in non-injected clone | Total number of dividing cells |
| 1                                                                      | 12                           | 3                       | 9                           | 0                                | 1                                    | 1                              |
| 2                                                                      | 25                           | 10                      | 15                          | 0                                | 1                                    | 1                              |
| 3                                                                      | 18                           | 3                       | 15                          | 0                                | 0                                    | 0                              |
| 4                                                                      | 21                           | 6                       | 15                          | 0                                | 2                                    | 2                              |
| 5                                                                      | 20                           | 4                       | 16                          | 1                                | 0                                    | 1                              |
| 6                                                                      | 21                           | 5                       | 16                          | 1                                | 0                                    | 1                              |
| 7                                                                      | 21                           | 7                       | 14                          | 1                                | 0                                    | 1                              |
| 8                                                                      | 14                           | 4                       | 10                          | 0                                | 2                                    | 2                              |
| 9                                                                      | 23                           | 8                       | 15                          | 0                                | 0                                    | 0                              |
| 10                                                                     | 26                           | 12                      | 14                          | 1                                | 0                                    | 1                              |
| 11                                                                     | 37                           | 16                      | 21                          | 0                                | 5                                    | 5                              |
| 12                                                                     | 20                           | 6                       | 14                          | 2                                | 1                                    | 3                              |
| 13                                                                     | 32                           | 16                      | 16                          | 0                                | 0                                    | 0                              |
| 14                                                                     | 19                           | 5                       | 14                          | 0                                | 0                                    | 0                              |
| 15                                                                     | 23                           | 8                       | 15                          | 0                                | 0                                    | 0                              |
| 16                                                                     | 24                           | 8                       | 16                          | 0                                | 0                                    | 0                              |
| 17                                                                     | 19                           | 4                       | 15                          | 0                                | 0                                    | 0                              |
| 18                                                                     | 20                           | 4                       | 16                          | 0                                | 0                                    | 0                              |
| 19                                                                     | 26                           | 10                      | 16                          | 0                                | 0                                    | 0                              |
| 20                                                                     | 17                           | 4                       | 13                          | 0                                | 0                                    | 0                              |
| 21                                                                     | 20                           | 4                       | 16                          | 0                                | 0                                    | 0                              |
| 22                                                                     | 17                           | 4                       | 13                          | 0                                | 2                                    | 2                              |
| 23                                                                     | 20                           | 4                       | 16                          | 0                                | 0                                    | 0                              |
| 24                                                                     | 24                           | 8                       | 16                          | 0                                | 0                                    | 0                              |
| 25                                                                     | 25                           | 9                       | 16                          | 0                                | 0                                    | 0                              |
| 26                                                                     | 24                           | 8                       | 16                          | 0                                | 0                                    | 0                              |
| 27                                                                     | 18                           | 6                       | 12                          | 0                                | 2                                    | 2                              |
| 28                                                                     | 22                           | 6                       | 16                          | 2                                | 0                                    | 2                              |
| 29                                                                     | 22                           | 6                       | 16                          | 1                                | 0                                    | 1                              |
| 30                                                                     | 23                           | 8                       | 15                          | 0                                | 0                                    | 0                              |
| <b>TOTAL</b>                                                           | <b>653</b>                   | <b>206</b>              | <b>447</b>                  | <b>9</b>                         | <b>16</b>                            | <b>25</b>                      |
| <b>AVERAGE</b>                                                         | <b>21.8</b>                  | <b>6.9</b>              | <b>14.9</b>                 | <b>0.3</b>                       | <b>0.5</b>                           | <b>0.8</b>                     |
| <b>SEM</b>                                                             | <b>0.9</b>                   | <b>0.6</b>              | <b>0.4</b>                  | <b>0.1</b>                       | <b>0.2</b>                           | <b>0.2</b>                     |
| Stat. sig. (inter-clone) †p<0.05, ††p<0.005                            |                              | ††                      |                             |                                  |                                      |                                |
| p-value (2-tailed students t-test)                                     |                              | 7.46E-16                |                             | 3.13E-01                         |                                      |                                |
| Stat. sig. (exp. vs. con embryo) *p<0.05, **p<0.005                    | **                           | **                      | **                          | *                                |                                      | *                              |
| p-value (2-tailed students t-test)                                     | 1.23E-08                     | 1.95E-10                | 4.18E-03                    | 2.01E-02                         | 1.24E-01                             | 2.15E-02                       |

Supplementary Tables ST11

| <b>Control siRNA (10<math>\mu</math>M), 1in2 micro-injection, &gt;64-cell (E4.5) stage</b> |                              |                         |                             |                                  |                                      |                                |
|--------------------------------------------------------------------------------------------|------------------------------|-------------------------|-----------------------------|----------------------------------|--------------------------------------|--------------------------------|
| #                                                                                          | Total cell number per embryo | Cells in injected clone | Cells in non-injected clone | Dividing cells in injected clone | Dividing cells in non-injected clone | Total number of dividing cells |
| 1                                                                                          | 75                           | 36                      | 39                          | 1                                | 1                                    | 2                              |
| 2                                                                                          | 69                           | 33                      | 36                          | 2                                | 1                                    | 3                              |
| 3                                                                                          | 62                           | 29                      | 33                          | 1                                | 1                                    | 2                              |
| 4                                                                                          | 68                           | 35                      | 33                          | 0                                | 1                                    | 1                              |
| 5                                                                                          | 65                           | 32                      | 33                          | 1                                | 0                                    | 1                              |
| 6                                                                                          | 86                           | 42                      | 44                          | 2                                | 0                                    | 2                              |
| 7                                                                                          | 67                           | 33                      | 34                          | 2                                | 0                                    | 2                              |
| 8                                                                                          | 76                           | 37                      | 39                          | 1                                | 0                                    | 1                              |
| 9                                                                                          | 68                           | 33                      | 35                          | 1                                | 1                                    | 2                              |
| 10                                                                                         | 77                           | 38                      | 39                          | 3                                | 0                                    | 3                              |
| 11                                                                                         | 80                           | 36                      | 44                          | 1                                | 0                                    | 1                              |
| 12                                                                                         | 68                           | 34                      | 34                          | 2                                | 0                                    | 2                              |
| 13                                                                                         | 80                           | 39                      | 41                          | 0                                | 0                                    | 0                              |
| <b>TOTAL</b>                                                                               | <b>941</b>                   | <b>457</b>              | <b>484</b>                  | <b>17</b>                        | <b>5</b>                             | <b>22</b>                      |
| <b>AVERAGE</b>                                                                             | <b>72.4</b>                  | <b>35.2</b>             | <b>37.2</b>                 | <b>1.3</b>                       | <b>0.4</b>                           | <b>1.7</b>                     |
| <b>SEM</b>                                                                                 | <b>2.0</b>                   | <b>0.9</b>              | <b>1.1</b>                  | <b>0.2</b>                       | <b>0.1</b>                           | <b>0.2</b>                     |
| Stat. sig. (inter-clone) †p<0.05, ††p<0.005                                                |                              |                         |                             | ††                               |                                      |                                |
| p-value (2-tailed students t-test)                                                         |                              | 1.69E-01                |                             | 2.67E-03                         |                                      |                                |

| <b>Wwc2-specific siRNA (10<math>\mu</math>M), 1in2 micro-injection, &gt;64-cell (E4.5) stage</b> |                              |                         |                             |                                  |                                      |                                |
|--------------------------------------------------------------------------------------------------|------------------------------|-------------------------|-----------------------------|----------------------------------|--------------------------------------|--------------------------------|
| #                                                                                                | Total cell number per embryo | Cells in injected clone | Cells in non-injected clone | Dividing cells in injected clone | Dividing cells in non-injected clone | Total number of dividing cells |
| 1                                                                                                | 45                           | 15                      | 30                          | 0                                | 5                                    | 5                              |
| 2                                                                                                | 33                           | 9                       | 24                          | 0                                | 3                                    | 3                              |
| 3                                                                                                | 44                           | 14                      | 30                          | 0                                | 1                                    | 1                              |
| 4                                                                                                | 37                           | 8                       | 29                          | 0                                | 2                                    | 2                              |
| 5                                                                                                | 62                           | 15                      | 47                          | 2                                | 0                                    | 2                              |
| 6                                                                                                | 45                           | 14                      | 31                          | 0                                | 3                                    | 3                              |
| 7                                                                                                | 44                           | 18                      | 26                          | 0                                | 1                                    | 1                              |
| 8                                                                                                | 61                           | 19                      | 42                          | 0                                | 3                                    | 3                              |
| 9                                                                                                | 69                           | 19                      | 50                          | 1                                | 4                                    | 5                              |
| 10                                                                                               | 53                           | 11                      | 42                          | 1                                | 2                                    | 3                              |
| 11                                                                                               | 59                           | 21                      | 38                          | 1                                | 2                                    | 3                              |
| 12                                                                                               | 52                           | 16                      | 36                          | 0                                | 1                                    | 1                              |
| 13                                                                                               | 43                           | 16                      | 27                          | 1                                | 5                                    | 6                              |
| 14                                                                                               | 57                           | 17                      | 40                          | 1                                | 1                                    | 2                              |
| 15                                                                                               | 54                           | 14                      | 40                          | 0                                | 2                                    | 2                              |
| 16                                                                                               | 54                           | 17                      | 37                          | 0                                | 4                                    | 4                              |
| <b>TOTAL</b>                                                                                     | <b>812</b>                   | <b>243</b>              | <b>569</b>                  | <b>7</b>                         | <b>39</b>                            | <b>46</b>                      |
| <b>AVERAGE</b>                                                                                   | <b>50.8</b>                  | <b>15.2</b>             | <b>35.6</b>                 | <b>0.4</b>                       | <b>2.4</b>                           | <b>2.9</b>                     |
| <b>SEM</b>                                                                                       | <b>2.4</b>                   | <b>0.9</b>              | <b>1.9</b>                  | <b>0.2</b>                       | <b>0.4</b>                           | <b>0.4</b>                     |
| Stat. sig. (inter-clone) †p<0.05, ††p<0.005                                                      |                              | ††                      |                             | ††                               |                                      |                                |
| p-value (2-tailed students t-test)                                                               |                              | 1.21E-10                |                             | 3.03E-05                         |                                      |                                |
| Stat. sig. (exp. vs. con embryo) *p<0.05, **p<0.005                                              | **                           | **                      |                             | **                               | **                                   | *                              |
| p-value (2-tailed students t-test)                                                               | 3.49E-07                     | 7.49E-15                | 4.88E-01                    | 3.89E-03                         | 6.90E-05                             | 1.78E-02                       |

| Control (GFP) dsRNA (300ng/ $\mu$ l), 1in2 micro-injection, >64-cell (E4.5) stage |                              |                         |                             |
|-----------------------------------------------------------------------------------|------------------------------|-------------------------|-----------------------------|
| #                                                                                 | Total cell number per embryo | Cells in injected clone | Cells in non-injected clone |
| 1                                                                                 | 63                           | not assayed             | not assayed                 |
| 2                                                                                 | 99                           | not assayed             | not assayed                 |
| 3                                                                                 | 55                           | not assayed             | not assayed                 |
| 4                                                                                 | 83                           | not assayed             | not assayed                 |
| 5                                                                                 | 102                          | not assayed             | not assayed                 |
| 6                                                                                 | 76                           | not assayed             | not assayed                 |
| 7                                                                                 | 83                           | not assayed             | not assayed                 |
| 8                                                                                 | 83                           | 38                      | 45                          |
| 9                                                                                 | 75                           | 37                      | 38                          |
| 10                                                                                | 91                           | 44                      | 47                          |
| 11                                                                                | 82                           | 41                      | 41                          |
| 12                                                                                | 71                           | 38                      | 33                          |
| 13                                                                                | 76                           | 39                      | 37                          |
| 14                                                                                | 89                           | 46                      | 43                          |
| 15                                                                                | 93                           | 45                      | 48                          |
| 16                                                                                | 68                           | 27                      | 41                          |
| 17                                                                                | 86                           | 44                      | 42                          |
| <b>TOTAL</b>                                                                      | <b>1375</b>                  | <b>399</b>              | <b>415</b>                  |
| <b>AVERAGE</b>                                                                    | <b>80.9</b>                  | <b>39.9</b>             | <b>41.5</b>                 |
| <b>SEM</b>                                                                        | <b>3.0</b>                   | <b>1.8</b>              | <b>1.5</b>                  |
| Stat. sig. (inter-clone) #p<0.05, ##p<0.005                                       |                              |                         |                             |
| p-value (2-tailed students t-test)                                                |                              | 4.94E-01                |                             |

| Wwc2-specific (CDS) dsRNA (300ng/ $\mu$ l), 1in2 micro-injection, >64-cell (E4.5) stage |                              |                         |                             |
|-----------------------------------------------------------------------------------------|------------------------------|-------------------------|-----------------------------|
| #                                                                                       | Total cell number per embryo | Cells in injected clone | Cells in non-injected clone |
| 1                                                                                       | 77                           | not assayed             | not assayed                 |
| 2                                                                                       | 80                           | not assayed             | not assayed                 |
| 3                                                                                       | 55                           | not assayed             | not assayed                 |
| 4                                                                                       | 41                           | not assayed             | not assayed                 |
| 5                                                                                       | 33                           | not assayed             | not assayed                 |
| 6                                                                                       | 44                           | not assayed             | not assayed                 |
| 7                                                                                       | 43                           | not assayed             | not assayed                 |
| 8                                                                                       | 23                           | not assayed             | not assayed                 |
| 9                                                                                       | 42                           | not assayed             | not assayed                 |
| 10                                                                                      | 45                           | not assayed             | not assayed                 |
| <b>TOTAL</b>                                                                            | <b>483</b>                   | <b>n/a</b>              | <b>n/a</b>                  |
| <b>AVERAGE</b>                                                                          | <b>48.3</b>                  | <b>n/a</b>              | <b>n/a</b>                  |
| <b>SEM</b>                                                                              | <b>5.7</b>                   | <b>n/a</b>              | <b>n/a</b>                  |
| Stat. sig. (inter-clone) #p<0.05, ##p<0.005                                             |                              |                         |                             |
| p-value (2-tailed students t-test)                                                      |                              | n/a                     |                             |
| Stat. sig. (exp. vs. con embryo) *p<0.05, **p<0.005                                     | **                           |                         |                             |
| p-value (2-tailed students t-test)                                                      | 8.35E-06                     | n/a                     | n/a                         |

| Kibra-specific (CDS) dsRNA (300ng/ $\mu$ l), 1in2 micro-injection, >64-cell (E4.5) stage |                              |                         |                             |
|------------------------------------------------------------------------------------------|------------------------------|-------------------------|-----------------------------|
| #                                                                                        | Total cell number per embryo | Cells in injected clone | Cells in non-injected clone |
| 1                                                                                        | 91                           | 45                      | 46                          |
| 2                                                                                        | 89                           | 45                      | 44                          |
| 3                                                                                        | 80                           | 48                      | 32                          |
| 4                                                                                        | 83                           | 35                      | 48                          |
| 5                                                                                        | 96                           | 57                      | 39                          |
| 6                                                                                        | 66                           | 19                      | 47                          |
| 7                                                                                        | 63                           | 42                      | 21                          |
| 8                                                                                        | 88                           | 46                      | 42                          |
| 9                                                                                        | 90                           | 30                      | 60                          |
| <b>TOTAL</b>                                                                             | <b>746</b>                   | <b>367</b>              | <b>379</b>                  |
| <b>AVERAGE</b>                                                                           | <b>82.9</b>                  | <b>40.8</b>             | <b>42.1</b>                 |
| <b>SEM</b>                                                                               | <b>3.8</b>                   | <b>3.7</b>              | <b>3.6</b>                  |
| Stat. sig. (inter-clone) #p<0.05, ##p<0.005                                              |                              |                         |                             |
| p-value (2-tailed students t-test)                                                       |                              | 8.01E-01                |                             |
| Stat. sig. (exp. vs. con embryo) *p<0.05, **p<0.005                                      |                              |                         |                             |
| p-value (2-tailed students t-test)                                                       | 6.91E-01                     | 8.29E-01                | 8.73E-01                    |
| Stat. sig. (exp. vs. Wwc2 (CDS) dsRNA embryo) §p<0.05, §§p<0.005                         | §§                           |                         |                             |
| p-value (2-tailed students t-test)                                                       | 1.23E-04                     | n/a                     | n/a                         |

| Kibra & Wwc2-specific (CDS) dsRNA (300ng/ $\mu$ l), 1in2 micro-injection, >64-cell (E4.5) stage |                              |                         |                             |
|-------------------------------------------------------------------------------------------------|------------------------------|-------------------------|-----------------------------|
| #                                                                                               | Total cell number per embryo | Cells in injected clone | Cells in non-injected clone |
| 1                                                                                               | 55                           | 17                      | 38                          |
| 2                                                                                               | 42                           | 14                      | 28                          |
| 3                                                                                               | 59                           | 15                      | 44                          |
| 4                                                                                               | 58                           | 15                      | 43                          |
| 5                                                                                               | 62                           | 21                      | 41                          |
| <b>TOTAL</b>                                                                                    | <b>276</b>                   | <b>82</b>               | <b>194</b>                  |
| <b>AVERAGE</b>                                                                                  | <b>55.2</b>                  | <b>16.4</b>             | <b>38.8</b>                 |
| <b>SEM</b>                                                                                      | <b>3.5</b>                   | <b>1.2</b>              | <b>2.9</b>                  |
| Stat. sig. (inter-clone) #p<0.05, ##p<0.005                                                     |                              | ##                      |                             |
| p-value (2-tailed students t-test)                                                              |                              | 1.00E-04                |                             |
| Stat. sig. (exp. vs. con embryo) *p<0.05, **p<0.005                                             | **                           | **                      |                             |
| p-value (2-tailed students t-test)                                                              | 3.19E-04                     | 8.20E-07                | 3.66E-01                    |
| Stat. sig. (exp. vs. Wwc2 (CDS) dsRNA embryo) §p<0.05, §§p<0.005                                |                              |                         |                             |
| p-value (2-tailed students t-test)                                                              | 4.32E-01                     | n/a                     | n/a                         |
| Stat. sig. (exp. vs. Kibra (CDS) dsRNA embryo) +p<0.05, ++p<0.005                               | ++                           | ++                      |                             |
| p-value (2-tailed students t-test)                                                              | 4.34E-04                     | 5.09E-04                | 5.51E-01                    |

| Control (GFP) dsRNA (300ng/ $\mu$ l), 1in2 micro-injection, 16-cell (E3.0) stage |                              |                         |                             |                              |                |                    |                              |                |                    |
|----------------------------------------------------------------------------------|------------------------------|-------------------------|-----------------------------|------------------------------|----------------|--------------------|------------------------------|----------------|--------------------|
| #                                                                                | Total cell number per embryo | Cells in injected clone | Cells in non-injected clone | Total OUTER cells per embryo | OUTER CELLS    |                    | Total INNER cells per embryo | INNER CELLS    |                    |
|                                                                                  |                              |                         |                             |                              | Injected clone | Non-Injected clone |                              | Injected clone | Non-Injected clone |
| 1                                                                                | 17                           | 8                       | 9                           | 9                            | 4              | 5                  | 8                            | 4              | 4                  |
| 2                                                                                | 16                           | 8                       | 8                           | 10                           | 5              | 5                  | 6                            | 3              | 3                  |
| 3                                                                                | 16                           | 8                       | 8                           | 12                           | 6              | 6                  | 4                            | 2              | 2                  |
| 4                                                                                | 17                           | 9                       | 8                           | 10                           | 5              | 5                  | 7                            | 4              | 3                  |
| 5                                                                                | 16                           | 8                       | 8                           | 11                           | 5              | 6                  | 5                            | 3              | 2                  |
| 6                                                                                | 16                           | 8                       | 8                           | 11                           | 6              | 5                  | 5                            | 2              | 3                  |
| 7                                                                                | 15                           | 7                       | 8                           | 10                           | 5              | 5                  | 5                            | 2              | 3                  |
| 8                                                                                | 16                           | 8                       | 8                           | 11                           | 5              | 6                  | 5                            | 3              | 2                  |
| <b>TOTAL</b>                                                                     | <b>129</b>                   | <b>64</b>               | <b>65</b>                   | <b>84</b>                    | <b>41</b>      | <b>43</b>          | <b>45</b>                    | <b>23</b>      | <b>22</b>          |
| <b>AVERAGE</b>                                                                   | <b>16.1</b>                  | <b>8.0</b>              | <b>8.1</b>                  | <b>10.5</b>                  | <b>5.1</b>     | <b>5.4</b>         | <b>5.6</b>                   | <b>2.9</b>     | <b>2.8</b>         |
| <b>SEM</b>                                                                       | <b>0.2</b>                   | <b>0.2</b>              | <b>0.1</b>                  | <b>0.3</b>                   | <b>0.2</b>     | <b>0.2</b>         | <b>0.5</b>                   | <b>0.3</b>     | <b>0.3</b>         |
| Stat. sig. (inter-clone) †p<0.05, ††p<0.005                                      |                              |                         |                             |                              |                |                    |                              |                |                    |
| p-value (2-tailed students t-test)                                               |                              | 5.90E-01                |                             |                              | 4.05E-01       |                    |                              | 7.51E-01       |                    |

| Wwc2-specific (CDS) dsRNA (300ng/ $\mu$ l), 1in2 micro-injection, 16-cell (E3.0) stage |                              |                         |                             |                              |                |                    |                              |                |                    |
|----------------------------------------------------------------------------------------|------------------------------|-------------------------|-----------------------------|------------------------------|----------------|--------------------|------------------------------|----------------|--------------------|
| #                                                                                      | Total cell number per embryo | Cells in injected clone | Cells in non-injected clone | Total OUTER cells per embryo | OUTER CELLS    |                    | Total INNER cells per embryo | INNER CELLS    |                    |
|                                                                                        |                              |                         |                             |                              | Injected clone | Non-Injected clone |                              | Injected clone | Non-Injected clone |
| 1                                                                                      | 12                           | 4                       | 8                           | 7                            | 2              | 5                  | 5                            | 2              | 3                  |
| 2                                                                                      | 12                           | 4                       | 8                           | 8                            | 3              | 5                  | 4                            | 1              | 3                  |
| 3                                                                                      | 14                           | 6                       | 8                           | 10                           | 6              | 4                  | 4                            | 0              | 4                  |
| 4                                                                                      | 16                           | 8                       | 8                           | 11                           | 6              | 5                  | 5                            | 2              | 3                  |
| 5                                                                                      | 12                           | 4                       | 8                           | 8                            | 4              | 4                  | 4                            | 0              | 4                  |
| 6                                                                                      | 13                           | 4                       | 9                           | 8                            | 4              | 4                  | 5                            | 0              | 5                  |
| 7                                                                                      | 16                           | 8                       | 8                           | 10                           | 5              | 5                  | 6                            | 3              | 3                  |
| 8                                                                                      | 12                           | 4                       | 8                           | 9                            | 4              | 5                  | 3                            | 0              | 3                  |
| 9                                                                                      | 16                           | 8                       | 8                           | 13                           | 7              | 6                  | 3                            | 1              | 2                  |
| 10                                                                                     | 19                           | 10                      | 9                           | 15                           | 8              | 7                  | 4                            | 2              | 2                  |
| <b>TOTAL</b>                                                                           | <b>142</b>                   | <b>60</b>               | <b>82</b>                   | <b>99</b>                    | <b>49</b>      | <b>50</b>          | <b>43</b>                    | <b>11</b>      | <b>32</b>          |
| <b>AVERAGE</b>                                                                         | <b>14.2</b>                  | <b>6.0</b>              | <b>8.2</b>                  | <b>9.9</b>                   | <b>4.9</b>     | <b>5.0</b>         | <b>4.3</b>                   | <b>1.1</b>     | <b>3.2</b>         |
| <b>SEM</b>                                                                             | <b>0.8</b>                   | <b>0.7</b>              | <b>0.1</b>                  | <b>0.8</b>                   | <b>0.6</b>     | <b>0.3</b>         | <b>0.3</b>                   | <b>0.3</b>     | <b>0.3</b>         |
| Stat. sig. (inter-clone) †p<0.05, ††p<0.005                                            |                              | †                       |                             |                              |                |                    |                              | ††             |                    |
| p-value (2-tailed students t-test)                                                     |                              | 8.32E-03                |                             |                              | 3.70E-01       |                    |                              | 2.07E-04       |                    |
| Stat. sig. (exp. vs. con embryo) *p<0.05, **p<0.005                                    | *                            | *                       |                             |                              |                |                    | *                            | **             |                    |
| p-value (2-tailed students t-test)                                                     | 4.63E-02                     | 2.98E-02                | 6.93E-01                    | 5.33E-01                     | 7.48E-01       | 3.29E-01           | 2.37E-02                     | 1.68E-03       | 2.71E-01           |

| #                 | Meiotic spindle status    |                          |                                                |                                       | 1 <sup>st</sup> meiotic polar body (PB1) |            |
|-------------------|---------------------------|--------------------------|------------------------------------------------|---------------------------------------|------------------------------------------|------------|
|                   | Normal MI arrested (+PB1) | Normal MI stage (no PB1) | Defective (e.g. dispersed chromosomes, no PB1) | Absent with ultra condensed chromatin | Present                                  | Absent     |
|                   | 1                         | 0                        | 1                                              | 0                                     | 0                                        | 0          |
| 2                 | 1                         | 0                        | 0                                              | 0                                     | 1                                        | 0          |
| 3                 | 1                         | 0                        | 0                                              | 0                                     | 1                                        | 0          |
| 4                 | 1                         | 0                        | 0                                              | 0                                     | 1                                        | 0          |
| 5                 | 1                         | 0                        | 0                                              | 0                                     | 1                                        | 0          |
| 6                 | 1                         | 0                        | 0                                              | 0                                     | 1                                        | 0          |
| 7                 | 1                         | 0                        | 0                                              | 0                                     | 1                                        | 0          |
| 8                 | 1                         | 0                        | 0                                              | 0                                     | 1                                        | 0          |
| 9                 | 1                         | 0                        | 0                                              | 0                                     | 1                                        | 0          |
| 10                | 1                         | 0                        | 0                                              | 0                                     | 1                                        | 0          |
| 11                | 1                         | 0                        | 0                                              | 0                                     | 1                                        | 0          |
| 12                | 1                         | 0                        | 0                                              | 0                                     | 1                                        | 0          |
| 13                | 1                         | 0                        | 0                                              | 0                                     | 1                                        | 0          |
| 14                | 1                         | 0                        | 0                                              | 0                                     | 1                                        | 0          |
| 15                | 1                         | 0                        | 0                                              | 0                                     | 1                                        | 0          |
| 16                | 1                         | 0                        | 0                                              | 0                                     | 1                                        | 0          |
| 17                | 1                         | 0                        | 0                                              | 0                                     | 1                                        | 0          |
| 18                | 1                         | 0                        | 0                                              | 0                                     | 1                                        | 0          |
| <b>TOTAL</b>      | <b>17</b>                 | <b>1</b>                 | <b>0</b>                                       | <b>0</b>                              | <b>17</b>                                | <b>1</b>   |
| <b>PERCENTAGE</b> | <b>94.4</b>               | <b>5.6</b>               | <b>0.0</b>                                     | <b>0.0</b>                            | <b>94.4</b>                              | <b>5.6</b> |

| #                                                                | Meiotic spindle status    |                          |                                                |                                       | 1 <sup>st</sup> meiotic polar body (PB1) |            |
|------------------------------------------------------------------|---------------------------|--------------------------|------------------------------------------------|---------------------------------------|------------------------------------------|------------|
|                                                                  | Normal MI arrested (+PB1) | Normal MI stage (no PB1) | Defective (e.g. dispersed chromosomes, no PB1) | Absent with ultra condensed chromatin | Present                                  | Absent     |
|                                                                  | 1                         | 1                        | 0                                              | 0                                     | 0                                        | 1          |
| 2                                                                | 1                         | 0                        | 0                                              | 0                                     | 1                                        | 0          |
| 3                                                                | 1                         | 0                        | 0                                              | 0                                     | 1                                        | 0          |
| 4                                                                | 1                         | 0                        | 0                                              | 0                                     | 1                                        | 0          |
| 5                                                                | 0                         | 1                        | 0                                              | 0                                     | 0                                        | 1          |
| 6                                                                | 1                         | 0                        | 0                                              | 0                                     | 1                                        | 0          |
| 7                                                                | 1                         | 0                        | 0                                              | 0                                     | 1                                        | 0          |
| 8                                                                | 1                         | 0                        | 0                                              | 0                                     | 1                                        | 0          |
| 9                                                                | 1                         | 0                        | 0                                              | 0                                     | 1                                        | 0          |
| 10                                                               | 1                         | 0                        | 0                                              | 0                                     | 1                                        | 0          |
| 11                                                               | 1                         | 0                        | 0                                              | 0                                     | 1                                        | 0          |
| 12                                                               | 1                         | 0                        | 0                                              | 0                                     | 1                                        | 0          |
| 13                                                               | 1                         | 0                        | 0                                              | 0                                     | 1                                        | 0          |
| 14                                                               | 1                         | 0                        | 0                                              | 0                                     | 1                                        | 0          |
| 15                                                               | 1                         | 0                        | 0                                              | 0                                     | 1                                        | 0          |
| 16                                                               | 1                         | 0                        | 0                                              | 0                                     | 1                                        | 0          |
| 17                                                               | 1                         | 0                        | 0                                              | 0                                     | 1                                        | 0          |
| 18                                                               | 0                         | 1                        | 0                                              | 0                                     | 1                                        | 0          |
| 19                                                               | 1                         | 0                        | 0                                              | 0                                     | 1                                        | 0          |
| 20                                                               | 1                         | 0                        | 0                                              | 0                                     | 1                                        | 0          |
| 21                                                               | 1                         | 0                        | 0                                              | 0                                     | 1                                        | 0          |
| 22                                                               | 1                         | 0                        | 0                                              | 0                                     | 1                                        | 0          |
| 23                                                               | 0                         | 1                        | 0                                              | 0                                     | 0                                        | 1          |
| 24                                                               | 1                         | 0                        | 0                                              | 0                                     | 1                                        | 0          |
| 25                                                               | 1                         | 0                        | 0                                              | 0                                     | 1                                        | 0          |
| 26                                                               | 1                         | 0                        | 0                                              | 0                                     | 1                                        | 0          |
| 27                                                               | 1                         | 0                        | 0                                              | 0                                     | 1                                        | 0          |
| 28                                                               | 1                         | 0                        | 0                                              | 0                                     | 1                                        | 0          |
| <b>TOTAL</b>                                                     | <b>26</b>                 | <b>2</b>                 | <b>0</b>                                       | <b>0</b>                              | <b>26</b>                                | <b>2</b>   |
| <b>PERCENTAGE</b>                                                | <b>92.9</b>               | <b>7.1</b>               | <b>0.0</b>                                     | <b>0.0</b>                            | <b>92.9</b>                              | <b>7.1</b> |
| Stat. sig. con. (siRNA) vs. con. (IVM) embryo †p<0.05, ††p<0.005 |                           |                          |                                                |                                       |                                          |            |
| p-value (2-tailed students t-test)                               | 8.36E-01                  | 8.36E-01                 | -                                              | -                                     | 8.36E-01                                 | 8.36E-01   |

| #                                                          | Meiotic spindle status    |                          |                                                |                                       | 1 <sup>st</sup> meiotic polar body (PB1) |             |
|------------------------------------------------------------|---------------------------|--------------------------|------------------------------------------------|---------------------------------------|------------------------------------------|-------------|
|                                                            | Normal MI arrested (+PB1) | Normal MI stage (no PB1) | Defective (e.g. dispersed chromosomes, no PB1) | Absent with ultra condensed chromatin | Present                                  | Absent      |
|                                                            | 1                         | 0                        | 0                                              | 1                                     | 0                                        | 0           |
| 2                                                          | 0                         | 0                        | 1                                              | 0                                     | 0                                        | 1           |
| 3                                                          | 0                         | 0                        | 1                                              | 0                                     | 0                                        | 1           |
| 4                                                          | 1                         | 0                        | 0                                              | 0                                     | 1                                        | 0           |
| 5                                                          | 0                         | 0                        | 1                                              | 0                                     | 0                                        | 1           |
| 6                                                          | 0                         | 1                        | 0                                              | 0                                     | 0                                        | 1           |
| 7                                                          | 0                         | 1                        | 0                                              | 0                                     | 0                                        | 1           |
| 8                                                          | 0                         | 0                        | 0                                              | 1                                     | 0                                        | 1           |
| 9                                                          | 0                         | 1                        | 0                                              | 0                                     | 0                                        | 1           |
| 10                                                         | 0                         | 0                        | 0                                              | 1                                     | 0                                        | 1           |
| 11                                                         | 0                         | 0                        | 0                                              | 1                                     | 0                                        | 1           |
| 12                                                         | 0                         | 0                        | 0                                              | 1                                     | 0                                        | 1           |
| 13                                                         | 0                         | 1                        | 0                                              | 0                                     | 0                                        | 1           |
| 14                                                         | 0                         | 1                        | 0                                              | 0                                     | 0                                        | 1           |
| 15                                                         | 0                         | 1                        | 0                                              | 0                                     | 0                                        | 1           |
| 16                                                         | 1                         | 0                        | 0                                              | 0                                     | 1                                        | 0           |
| 17                                                         | 0                         | 0                        | 0                                              | 1                                     | 0                                        | 1           |
| 18                                                         | 0                         | 0                        | 1                                              | 0                                     | 0                                        | 1           |
| 19                                                         | 0                         | 0                        | 0                                              | 1                                     | 0                                        | 1           |
| 20                                                         | 0                         | 0                        | 0                                              | 1                                     | 0                                        | 1           |
| 21                                                         | 0                         | 1                        | 0                                              | 0                                     | 0                                        | 1           |
| 22                                                         | 0                         | 0                        | 1                                              | 0                                     | 0                                        | 1           |
| 23                                                         | 0                         | 1                        | 0                                              | 0                                     | 0                                        | 1           |
| 24                                                         | 0                         | 0                        | 1                                              | 0                                     | 0                                        | 1           |
| 25                                                         | 0                         | 1                        | 0                                              | 0                                     | 0                                        | 1           |
| 26                                                         | 0                         | 1                        | 0                                              | 0                                     | 0                                        | 1           |
| 27                                                         | 1                         | 0                        | 0                                              | 0                                     | 0                                        | 1           |
| 28                                                         | 0                         | 1                        | 0                                              | 0                                     | 0                                        | 1           |
| 29                                                         | 0                         | 0                        | 1                                              | 0                                     | 0                                        | 1           |
| 30                                                         | 0                         | 1                        | 0                                              | 0                                     | 0                                        | 1           |
| 31                                                         | 0                         | 1                        | 0                                              | 0                                     | 0                                        | 1           |
| 32                                                         | 1                         | 0                        | 0                                              | 0                                     | 1                                        | 0           |
| 33                                                         | 0                         | 0                        | 0                                              | 1                                     | 0                                        | 1           |
| 34                                                         | 0                         | 0                        | 0                                              | 1                                     | 0                                        | 1           |
| 35                                                         | 0                         | 1                        | 0                                              | 0                                     | 0                                        | 1           |
| <b>TOTAL</b>                                               | <b>3</b>                  | <b>15</b>                | <b>8</b>                                       | <b>9</b>                              | <b>3</b>                                 | <b>32</b>   |
| <b>PERCENTAGE</b>                                          | <b>8.6</b>                | <b>42.9</b>              | <b>22.9</b>                                    | <b>25.7</b>                           | <b>8.6</b>                               | <b>91.4</b> |
| Stat. sig. exp. vs. con. (IVM) embryo †p<0.05, ††p<0.005   | ††                        | ††                       | †                                              | †                                     | ††                                       | ††          |
| p-value (2-tailed students t-test)                         | 4.37E-15                  | 4.44E-03                 | 2.78E-02                                       | 1.78E-02                              | 4.37E-15                                 | 4.37E-15    |
| Stat. sig. exp. vs. con. (siRNA) embryo *p<0.05, **p<0.005 | **                        | **                       | *                                              | **                                    | **                                       | **          |
| p-value (2-tailed students t-test)                         | 7.26E-18                  | 1.17E-03                 | 6.22E-03                                       | 3.25E-03                              | 7.26E-18                                 | 7.26E-18    |

| Control siRNA microinjected GV stage (+18h IBMX & extended 24h post IBMX wash-out) |                            |                          |                                                |                                       |                                          |             |
|------------------------------------------------------------------------------------|----------------------------|--------------------------|------------------------------------------------|---------------------------------------|------------------------------------------|-------------|
| #                                                                                  | Meiotic spindle status     |                          |                                                |                                       | 1 <sup>st</sup> meiotic polar body (PB1) |             |
|                                                                                    | Normal MII arrested (+PB1) | Normal MI stage (no PB1) | Defective (e.g. dispersed chromosomes, no PB1) | Absent with ultra condensed chromatin | Present                                  | Absent      |
| 1                                                                                  | 0                          | 1                        | 0                                              | 0                                     | 0                                        | 1           |
| 2                                                                                  | 1                          | 0                        | 0                                              | 0                                     | 1                                        | 0           |
| 3                                                                                  | 1                          | 0                        | 0                                              | 0                                     | 1                                        | 0           |
| 4                                                                                  | 1                          | 0                        | 0                                              | 0                                     | 1                                        | 0           |
| 5                                                                                  | 1                          | 0                        | 0                                              | 0                                     | 1                                        | 0           |
| 6                                                                                  | 1                          | 0                        | 0                                              | 0                                     | 1                                        | 0           |
| 7                                                                                  | 1                          | 0                        | 0                                              | 0                                     | 1                                        | 0           |
| 8                                                                                  | 0                          | 1                        | 0                                              | 0                                     | 0                                        | 1           |
| 9                                                                                  | 1                          | 0                        | 0                                              | 0                                     | 1                                        | 0           |
| 10                                                                                 | 0                          | 1                        | 0                                              | 0                                     | 0                                        | 1           |
| 11                                                                                 | 0                          | 0                        | 1                                              | 0                                     | 0                                        | 1           |
| 12                                                                                 | 1                          | 0                        | 0                                              | 0                                     | 1                                        | 0           |
| 13                                                                                 | 1                          | 0                        | 0                                              | 0                                     | 1                                        | 0           |
| 14                                                                                 | 1                          | 0                        | 0                                              | 0                                     | 1                                        | 0           |
| 15                                                                                 | 1                          | 0                        | 0                                              | 0                                     | 1                                        | 0           |
| 16                                                                                 | 1                          | 0                        | 0                                              | 0                                     | 1                                        | 0           |
| 17                                                                                 | 1                          | 0                        | 0                                              | 0                                     | 1                                        | 0           |
| 18                                                                                 | 1                          | 0                        | 0                                              | 0                                     | 1                                        | 0           |
| 19                                                                                 | 1                          | 0                        | 0                                              | 0                                     | 1                                        | 0           |
| 20                                                                                 | 1                          | 0                        | 0                                              | 0                                     | 1                                        | 0           |
| 21                                                                                 | 1                          | 0                        | 0                                              | 0                                     | 1                                        | 0           |
| 22                                                                                 | 1                          | 0                        | 0                                              | 0                                     | 1                                        | 0           |
| 23                                                                                 | 0                          | 1                        | 0                                              | 0                                     | 0                                        | 1           |
| 24                                                                                 | 1                          | 0                        | 0                                              | 0                                     | 1                                        | 0           |
| 25                                                                                 | 1                          | 0                        | 0                                              | 0                                     | 1                                        | 0           |
| 26                                                                                 | 1                          | 0                        | 0                                              | 0                                     | 1                                        | 0           |
| 27                                                                                 | 0                          | 1                        | 0                                              | 0                                     | 0                                        | 1           |
| <b>TOTAL</b>                                                                       | <b>21</b>                  | <b>5</b>                 | <b>1</b>                                       | <b>0</b>                              | <b>21</b>                                | <b>6</b>    |
| <b>PERCENTAGE</b>                                                                  | <b>77.8</b>                | <b>18.5</b>              | <b>3.7</b>                                     | <b>0.0</b>                            | <b>77.8</b>                              | <b>22.2</b> |

| Wwc2 siRNA microinjected GV stage (+18h IBMX & extended 24h post IBMX wash-out) |                            |                          |                                                |                                       |                                          |             |
|---------------------------------------------------------------------------------|----------------------------|--------------------------|------------------------------------------------|---------------------------------------|------------------------------------------|-------------|
| #                                                                               | Meiotic spindle status     |                          |                                                |                                       | 1 <sup>st</sup> meiotic polar body (PB1) |             |
|                                                                                 | Normal MII arrested (+PB1) | Normal MI stage (no PB1) | Defective (e.g. dispersed chromosomes, no PB1) | Absent with ultra condensed chromatin | Present                                  | Absent      |
| 1                                                                               | 0                          | 0                        | 1                                              | 0                                     | 0                                        | 1           |
| 2                                                                               | 0                          | 1                        | 0                                              | 0                                     | 0                                        | 1           |
| 3                                                                               | 0                          | 0                        | 1                                              | 0                                     | 0                                        | 1           |
| 4                                                                               | 0                          | 0                        | 1                                              | 0                                     | 0                                        | 1           |
| 5                                                                               | 0                          | 0                        | 1                                              | 0                                     | 0                                        | 1           |
| 6                                                                               | 0                          | 0                        | 1                                              | 0                                     | 0                                        | 1           |
| 7                                                                               | 0                          | 0                        | 1                                              | 0                                     | 0                                        | 1           |
| 8                                                                               | 0                          | 0                        | 1                                              | 0                                     | 0                                        | 1           |
| 9                                                                               | 0                          | 1                        | 0                                              | 0                                     | 0                                        | 1           |
| 10                                                                              | 0                          | 0                        | 1                                              | 0                                     | 0                                        | 1           |
| 11                                                                              | 0                          | 0                        | 1                                              | 0                                     | 0                                        | 1           |
| 12                                                                              | 0                          | 0                        | 0                                              | 1                                     | 0                                        | 1           |
| 13                                                                              | 1                          | 0                        | 0                                              | 0                                     | 1                                        | 0           |
| 14                                                                              | 1                          | 0                        | 0                                              | 0                                     | 1                                        | 0           |
| 15                                                                              | 0                          | 0                        | 1                                              | 0                                     | 0                                        | 1           |
| 16                                                                              | 0                          | 0                        | 1                                              | 0                                     | 0                                        | 1           |
| 17                                                                              | 0                          | 0                        | 1                                              | 0                                     | 0                                        | 1           |
| 18                                                                              | 0                          | 0                        | 1                                              | 0                                     | 0                                        | 1           |
| 19                                                                              | 0                          | 0                        | 1                                              | 0                                     | 0                                        | 1           |
| 20                                                                              | 0                          | 0                        | 1                                              | 0                                     | 0                                        | 1           |
| 21                                                                              | 0                          | 0                        | 1                                              | 0                                     | 0                                        | 1           |
| 22                                                                              | 0                          | 0                        | 0                                              | 1                                     | 0                                        | 1           |
| 23                                                                              | 0                          | 1                        | 0                                              | 0                                     | 0                                        | 1           |
| 24                                                                              | 0                          | 1                        | 0                                              | 0                                     | 0                                        | 1           |
| 25                                                                              | 0                          | 0                        | 1                                              | 0                                     | 0                                        | 1           |
| 26                                                                              | 0                          | 0                        | 0                                              | 1                                     | 0                                        | 1           |
| 27                                                                              | 0                          | 0                        | 1                                              | 0                                     | 0                                        | 1           |
| 28                                                                              | 0                          | 0                        | 1                                              | 0                                     | 0                                        | 1           |
| 29                                                                              | 0                          | 0                        | 1                                              | 0                                     | 0                                        | 1           |
| 30                                                                              | 0                          | 0                        | 1                                              | 0                                     | 0                                        | 1           |
| 31                                                                              | 0                          | 1                        | 0                                              | 0                                     | 0                                        | 1           |
| 32                                                                              | 0                          | 0                        | 0                                              | 1                                     | 0                                        | 1           |
| <b>TOTAL</b>                                                                    | <b>2</b>                   | <b>5</b>                 | <b>21</b>                                      | <b>4</b>                              | <b>2</b>                                 | <b>30</b>   |
| <b>PERCENTAGE</b>                                                               | <b>6.3</b>                 | <b>15.6</b>              | <b>65.6</b>                                    | <b>12.5</b>                           | <b>6.3</b>                               | <b>93.8</b> |
| Stat. sig. Wwc2 KD vs. con. siRNA embryo ‡p<0.05, ††p<0.005                     | ††                         |                          | ††                                             |                                       | ††                                       | ††          |
| p-value (2-tailed students t-test)                                              | 5.07E-11                   | 7.73E-01                 | 5.49E-08                                       | 5.85E-02                              | 5.07E-11                                 | 5.07E-11    |

| Control siRNA microinjected GV stage (+18h IBMX & 1h post IBMX wash-out) |                            |                          |                                                |                                       |            |                   |                                          |              |
|--------------------------------------------------------------------------|----------------------------|--------------------------|------------------------------------------------|---------------------------------------|------------|-------------------|------------------------------------------|--------------|
| #                                                                        | Meiotic spindle status     |                          |                                                |                                       |            |                   | 1 <sup>st</sup> meiotic polar body (PB1) |              |
|                                                                          | Normal MII arrested (+PB1) | Normal MI stage (no PB1) | Defective (e.g. dispersed chromosomes, no PB1) | Absent with ultra condensed chromatin | GV intact  | GVBD (no spindle) | Present                                  | Absent       |
| 1                                                                        | 0                          | 0                        | 0                                              | 0                                     | 1          | 0                 | 0                                        | 1            |
| 2                                                                        | 0                          | 0                        | 0                                              | 0                                     | 0          | 1                 | 0                                        | 1            |
| 3                                                                        | 0                          | 0                        | 0                                              | 0                                     | 0          | 1                 | 0                                        | 1            |
| 4                                                                        | 0                          | 0                        | 0                                              | 0                                     | 0          | 1                 | 0                                        | 1            |
| 5                                                                        | 0                          | 0                        | 0                                              | 0                                     | 0          | 1                 | 0                                        | 1            |
| 6                                                                        | 0                          | 0                        | 0                                              | 0                                     | 0          | 1                 | 0                                        | 1            |
| 7                                                                        | 0                          | 0                        | 0                                              | 0                                     | 0          | 1                 | 0                                        | 1            |
| 8                                                                        | 0                          | 0                        | 0                                              | 0                                     | 0          | 1                 | 0                                        | 1            |
| 9                                                                        | 0                          | 0                        | 0                                              | 0                                     | 0          | 1                 | 0                                        | 1            |
| 10                                                                       | 0                          | 0                        | 0                                              | 0                                     | 0          | 1                 | 0                                        | 1            |
| 11                                                                       | 0                          | 0                        | 0                                              | 0                                     | 0          | 1                 | 0                                        | 1            |
| 12                                                                       | 0                          | 0                        | 0                                              | 0                                     | 0          | 1                 | 0                                        | 1            |
| 13                                                                       | 0                          | 0                        | 0                                              | 0                                     | 0          | 1                 | 0                                        | 1            |
| 14                                                                       | 0                          | 0                        | 0                                              | 0                                     | 0          | 1                 | 0                                        | 1            |
| <b>TOTAL</b>                                                             | <b>0</b>                   | <b>0</b>                 | <b>0</b>                                       | <b>0</b>                              | <b>1</b>   | <b>13</b>         | <b>0</b>                                 | <b>14</b>    |
| <b>PERCENTAGE</b>                                                        | <b>0.0</b>                 | <b>0.0</b>               | <b>0.0</b>                                     | <b>0.0</b>                            | <b>7.1</b> | <b>92.9</b>       | <b>0.0</b>                               | <b>100.0</b> |

| Wwc2 siRNA microinjected GV stage (+18h IBMX & 1h post IBMX wash-out) |                            |                          |                                                |                                       |             |                   |                                          |              |
|-----------------------------------------------------------------------|----------------------------|--------------------------|------------------------------------------------|---------------------------------------|-------------|-------------------|------------------------------------------|--------------|
| #                                                                     | Meiotic spindle status     |                          |                                                |                                       |             |                   | 1 <sup>st</sup> meiotic polar body (PB1) |              |
|                                                                       | Normal MII arrested (+PB1) | Normal MI stage (no PB1) | Defective (e.g. dispersed chromosomes, no PB1) | Absent with ultra condensed chromatin | GV intact   | GVBD (no spindle) | Present                                  | Absent       |
| 1                                                                     | 0                          | 0                        | 0                                              | 0                                     | 1           | 0                 | 0                                        | 1            |
| 2                                                                     | 0                          | 0                        | 0                                              | 0                                     | 0           | 1                 | 0                                        | 1            |
| 3                                                                     | 0                          | 0                        | 0                                              | 0                                     | 1           | 0                 | 0                                        | 1            |
| 4                                                                     | 0                          | 0                        | 0                                              | 0                                     | 1           | 0                 | 0                                        | 1            |
| 5                                                                     | 0                          | 0                        | 0                                              | 0                                     | 1           | 0                 | 0                                        | 1            |
| 6                                                                     | 0                          | 0                        | 0                                              | 0                                     | 0           | 1                 | 0                                        | 1            |
| 7                                                                     | 0                          | 0                        | 0                                              | 0                                     | 0           | 1                 | 0                                        | 1            |
| 8                                                                     | 0                          | 0                        | 0                                              | 0                                     | 0           | 1                 | 0                                        | 1            |
| 9                                                                     | 0                          | 0                        | 0                                              | 1                                     | 0           | 0                 | 0                                        | 1            |
| 10                                                                    | 0                          | 0                        | 0                                              | 0                                     | 1           | 0                 | 0                                        | 1            |
| 11                                                                    | 0                          | 0                        | 0                                              | 0                                     | 0           | 1                 | 0                                        | 1            |
| 12                                                                    | 0                          | 0                        | 0                                              | 0                                     | 1           | 0                 | 0                                        | 1            |
| 13                                                                    | 0                          | 0                        | 0                                              | 0                                     | 0           | 1                 | 0                                        | 1            |
| 14                                                                    | 0                          | 0                        | 0                                              | 0                                     | 0           | 1                 | 0                                        | 1            |
| 15                                                                    | 0                          | 0                        | 0                                              | 0                                     | 0           | 1                 | 0                                        | 1            |
| <b>TOTAL</b>                                                          | <b>0</b>                   | <b>0</b>                 | <b>0</b>                                       | <b>1</b>                              | <b>6</b>    | <b>8</b>          | <b>0</b>                                 | <b>15</b>    |
| <b>PERCENTAGE</b>                                                     | <b>0.0</b>                 | <b>0.0</b>               | <b>0.0</b>                                     | <b>6.7</b>                            | <b>40.0</b> | <b>53.3</b>       | <b>0.0</b>                               | <b>100.0</b> |
| Stat. sig. Wwc2 siRNA vs. con. siRNA embryo †p<0.05, ††p<0.005        |                            |                          |                                                |                                       | ‡           | ‡                 |                                          |              |
| p-value (2-tailed students t-test)                                    | n/a                        | n/a                      | n/a                                            | 3.43E-01                              | 3.99E-02    | 1.64E-02          | n/a                                      | n/a          |

| Wwc2 siRNA + Wwc2-HA mRNA microinjected GV stage (+18h IBMX & 1h post IBMX wash-out) |                            |                          |                                                |                                       |             |                   |                                          |              |
|--------------------------------------------------------------------------------------|----------------------------|--------------------------|------------------------------------------------|---------------------------------------|-------------|-------------------|------------------------------------------|--------------|
| #                                                                                    | Meiotic spindle status     |                          |                                                |                                       |             |                   | 1 <sup>st</sup> meiotic polar body (PB1) |              |
|                                                                                      | Normal MII arrested (+PB1) | Normal MI stage (no PB1) | Defective (e.g. dispersed chromosomes, no PB1) | Absent with ultra condensed chromatin | GV intact   | GVBD (no spindle) | Present                                  | Absent       |
| 1                                                                                    | 0                          | 0                        | 0                                              | 0                                     | 1           | 0                 | 0                                        | 1            |
| 2                                                                                    | 0                          | 0                        | 0                                              | 0                                     | 0           | 1                 | 0                                        | 1            |
| 3                                                                                    | 0                          | 0                        | 0                                              | 0                                     | 0           | 1                 | 0                                        | 1            |
| 4                                                                                    | 0                          | 0                        | 0                                              | 0                                     | 0           | 1                 | 0                                        | 1            |
| 5                                                                                    | 0                          | 0                        | 0                                              | 0                                     | 0           | 1                 | 0                                        | 1            |
| 6                                                                                    | 0                          | 0                        | 0                                              | 0                                     | 0           | 1                 | 0                                        | 1            |
| 7                                                                                    | 0                          | 0                        | 0                                              | 0                                     | 0           | 1                 | 0                                        | 1            |
| 8                                                                                    | 0                          | 0                        | 0                                              | 0                                     | 0           | 1                 | 0                                        | 1            |
| 9                                                                                    | 0                          | 0                        | 0                                              | 0                                     | 0           | 1                 | 0                                        | 1            |
| 10                                                                                   | 0                          | 0                        | 0                                              | 0                                     | 0           | 1                 | 0                                        | 1            |
| 11                                                                                   | 0                          | 0                        | 0                                              | 0                                     | 0           | 1                 | 0                                        | 1            |
| 12                                                                                   | 0                          | 0                        | 0                                              | 0                                     | 0           | 1                 | 0                                        | 1            |
| 13                                                                                   | 0                          | 0                        | 0                                              | 0                                     | 0           | 1                 | 0                                        | 1            |
| 14                                                                                   | 0                          | 0                        | 0                                              | 0                                     | 0           | 1                 | 0                                        | 1            |
| 15                                                                                   | 0                          | 0                        | 0                                              | 0                                     | 0           | 1                 | 0                                        | 1            |
| 16                                                                                   | 0                          | 0                        | 0                                              | 0                                     | 1           | 0                 | 0                                        | 1            |
| <b>TOTAL</b>                                                                         | <b>0</b>                   | <b>0</b>                 | <b>0</b>                                       | <b>0</b>                              | <b>2</b>    | <b>14</b>         | <b>0</b>                                 | <b>16</b>    |
| <b>PERCENTAGE</b>                                                                    | <b>0.0</b>                 | <b>0.0</b>               | <b>0.0</b>                                     | <b>0.0</b>                            | <b>12.5</b> | <b>87.5</b>       | <b>0.0</b>                               | <b>100.0</b> |
| Stat. sig. Wwc2 KD (rescue) vs. con. siRNA embryo †p<0.05, ††p<0.005                 |                            |                          |                                                |                                       |             |                   |                                          |              |
| p-value (2-tailed students t-test)                                                   | n/a                        | n/a                      | n/a                                            | n/a                                   | 6.40E-01    | 6.40E-01          | n/a                                      | n/a          |
| Stat. sig. Wwc2 KD (rescue) vs. Wwc2 siRNA embryo *p<0.05, **p<0.005                 |                            |                          |                                                |                                       |             | *                 |                                          |              |
| p-value (2-tailed students t-test)                                                   | n/a                        | n/a                      | n/a                                            | 3.10E-01                              | 8.53E-02    | 3.70E-02          | n/a                                      | n/a          |



| Control siRNA microinjected GV stage (+18h IBMX & 6h post IBMX wash-out) |                           |                          |                                                |                                       |            |                   |                                          |              |
|--------------------------------------------------------------------------|---------------------------|--------------------------|------------------------------------------------|---------------------------------------|------------|-------------------|------------------------------------------|--------------|
| #                                                                        | Meiotic spindle status    |                          |                                                |                                       |            |                   | 1 <sup>st</sup> meiotic polar body (PB1) |              |
|                                                                          | Normal MI arrested (+PB1) | Normal MI stage (no PB1) | Defective (e.g. dispersed chromosomes, no PB1) | Absent with ultra condensed chromatin | GV intact  | GVBD (no spindle) | Present                                  | Absent       |
| 1                                                                        | 0                         | 1                        | 0                                              | 0                                     | 0          | 0                 | 0                                        | 1            |
| 2                                                                        | 0                         | 0                        | 1                                              | 0                                     | 0          | 0                 | 0                                        | 1            |
| 3                                                                        | 0                         | 1                        | 0                                              | 0                                     | 0          | 0                 | 0                                        | 1            |
| 4                                                                        | 0                         | 1                        | 0                                              | 0                                     | 0          | 0                 | 0                                        | 1            |
| 5                                                                        | 0                         | 1                        | 0                                              | 0                                     | 0          | 0                 | 0                                        | 1            |
| 6                                                                        | 0                         | 1                        | 0                                              | 0                                     | 0          | 0                 | 0                                        | 1            |
| 7                                                                        | 0                         | 1                        | 0                                              | 0                                     | 0          | 0                 | 0                                        | 1            |
| 8                                                                        | 0                         | 1                        | 0                                              | 0                                     | 0          | 0                 | 0                                        | 1            |
| 9                                                                        | 0                         | 0                        | 1                                              | 0                                     | 0          | 0                 | 0                                        | 1            |
| 10                                                                       | 0                         | 1                        | 0                                              | 0                                     | 0          | 0                 | 0                                        | 1            |
| 11                                                                       | 0                         | 1                        | 0                                              | 0                                     | 0          | 0                 | 0                                        | 1            |
| 12                                                                       | 0                         | 1                        | 0                                              | 0                                     | 0          | 0                 | 0                                        | 1            |
| 13                                                                       | 0                         | 1                        | 0                                              | 0                                     | 0          | 0                 | 0                                        | 1            |
| 14                                                                       | 0                         | 1                        | 0                                              | 0                                     | 0          | 0                 | 0                                        | 1            |
| 15                                                                       | 0                         | 1                        | 0                                              | 0                                     | 0          | 0                 | 0                                        | 1            |
| <b>TOTAL</b>                                                             | <b>0</b>                  | <b>13</b>                | <b>2</b>                                       | <b>0</b>                              | <b>0</b>   | <b>0</b>          | <b>0</b>                                 | <b>15</b>    |
| <b>PERCENTAGE</b>                                                        | <b>0.0</b>                | <b>86.7</b>              | <b>13.3</b>                                    | <b>0.0</b>                            | <b>0.0</b> | <b>0.0</b>        | <b>0.0</b>                               | <b>100.0</b> |

| Wwc2 siRNA microinjected GV stage (+18h IBMX & 6h post IBMX wash-out) |                           |                          |                                                |                                       |             |                   |                                          |              |
|-----------------------------------------------------------------------|---------------------------|--------------------------|------------------------------------------------|---------------------------------------|-------------|-------------------|------------------------------------------|--------------|
| #                                                                     | Meiotic spindle status    |                          |                                                |                                       |             |                   | 1 <sup>st</sup> meiotic polar body (PB1) |              |
|                                                                       | Normal MI arrested (+PB1) | Normal MI stage (no PB1) | Defective (e.g. dispersed chromosomes, no PB1) | Absent with ultra condensed chromatin | GV intact   | GVBD (no spindle) | Present                                  | Absent       |
| 1                                                                     | 0                         | 0                        | 1                                              | 0                                     | 0           | 0                 | 0                                        | 1            |
| 2                                                                     | 0                         | 1                        | 0                                              | 0                                     | 0           | 0                 | 0                                        | 1            |
| 3                                                                     | 0                         | 0                        | 1                                              | 0                                     | 0           | 0                 | 0                                        | 1            |
| 4                                                                     | 0                         | 0                        | 1                                              | 0                                     | 0           | 0                 | 0                                        | 1            |
| 5                                                                     | 0                         | 1                        | 0                                              | 0                                     | 0           | 0                 | 0                                        | 1            |
| 6                                                                     | 0                         | 0                        | 1                                              | 0                                     | 0           | 0                 | 0                                        | 1            |
| 7                                                                     | 0                         | 0                        | 1                                              | 0                                     | 0           | 0                 | 0                                        | 1            |
| 8                                                                     | 0                         | 0                        | 0                                              | 1                                     | 0           | 0                 | 0                                        | 1            |
| 9                                                                     | 0                         | 1                        | 0                                              | 0                                     | 0           | 0                 | 0                                        | 1            |
| 10                                                                    | 0                         | 0                        | 0                                              | 1                                     | 0           | 0                 | 0                                        | 1            |
| 11                                                                    | 0                         | 1                        | 0                                              | 0                                     | 0           | 0                 | 0                                        | 1            |
| 12                                                                    | 0                         | 1                        | 0                                              | 0                                     | 0           | 0                 | 0                                        | 1            |
| 13                                                                    | 0                         | 0                        | 0                                              | 0                                     | 1           | 0                 | 0                                        | 1            |
| 14                                                                    | 0                         | 1                        | 0                                              | 0                                     | 0           | 0                 | 0                                        | 1            |
| 15                                                                    | 0                         | 0                        | 0                                              | 0                                     | 1           | 0                 | 0                                        | 1            |
| 16                                                                    | 0                         | 0                        | 0                                              | 0                                     | 1           | 0                 | 0                                        | 1            |
| 17                                                                    | 0                         | 1                        | 0                                              | 0                                     | 0           | 0                 | 0                                        | 1            |
| 18                                                                    | 0                         | 1                        | 0                                              | 0                                     | 0           | 0                 | 0                                        | 1            |
| <b>TOTAL</b>                                                          | <b>0</b>                  | <b>8</b>                 | <b>5</b>                                       | <b>2</b>                              | <b>3</b>    | <b>0</b>          | <b>0</b>                                 | <b>18</b>    |
| <b>PERCENTAGE</b>                                                     | <b>0.0</b>                | <b>44.4</b>              | <b>27.8</b>                                    | <b>11.1</b>                           | <b>16.7</b> | <b>0.0</b>        | <b>0.0</b>                               | <b>100.0</b> |
| Stat. sig. Wwc2 siRNA vs. con. siRNA embryo †p<0.05, ‡‡p<0.005        |                           | ‡                        |                                                |                                       |             |                   |                                          |              |
| p-value (2-tailed students t-test)                                    | n/a                       | 1.10E-02                 | 3.27E-01                                       | 1.94E-01                              | 1.03E-01    | n/a               | n/a                                      | n/a          |

| Wwc2 siRNA + Wwc2-HA mRNA microinjected GV stage (+18h IBMX & 6h post IBMX wash-out) |                           |                          |                                                |                                       |            |                   |                                          |              |
|--------------------------------------------------------------------------------------|---------------------------|--------------------------|------------------------------------------------|---------------------------------------|------------|-------------------|------------------------------------------|--------------|
| #                                                                                    | Meiotic spindle status    |                          |                                                |                                       |            |                   | 1 <sup>st</sup> meiotic polar body (PB1) |              |
|                                                                                      | Normal MI arrested (+PB1) | Normal MI stage (no PB1) | Defective (e.g. dispersed chromosomes, no PB1) | Absent with ultra condensed chromatin | GV intact  | GVBD (no spindle) | Present                                  | Absent       |
| 1                                                                                    | 0                         | 1                        | 0                                              | 0                                     | 0          | 0                 | 0                                        | 1            |
| 2                                                                                    | 0                         | 1                        | 0                                              | 0                                     | 0          | 0                 | 0                                        | 1            |
| 3                                                                                    | 0                         | 1                        | 0                                              | 0                                     | 0          | 0                 | 0                                        | 1            |
| 4                                                                                    | 0                         | 1                        | 0                                              | 0                                     | 0          | 0                 | 0                                        | 1            |
| 5                                                                                    | 0                         | 1                        | 0                                              | 0                                     | 0          | 0                 | 0                                        | 1            |
| 6                                                                                    | 0                         | 1                        | 0                                              | 0                                     | 0          | 0                 | 0                                        | 1            |
| 7                                                                                    | 0                         | 1                        | 0                                              | 0                                     | 0          | 0                 | 0                                        | 1            |
| 8                                                                                    | 0                         | 1                        | 0                                              | 0                                     | 0          | 0                 | 0                                        | 1            |
| 9                                                                                    | 0                         | 0                        | 1                                              | 0                                     | 0          | 0                 | 0                                        | 1            |
| 10                                                                                   | 0                         | 0                        | 0                                              | 0                                     | 1          | 0                 | 0                                        | 1            |
| 11                                                                                   | 0                         | 1                        | 0                                              | 0                                     | 0          | 0                 | 0                                        | 1            |
| 12                                                                                   | 0                         | 1                        | 0                                              | 0                                     | 0          | 0                 | 0                                        | 1            |
| 13                                                                                   | 0                         | 1                        | 0                                              | 0                                     | 0          | 0                 | 0                                        | 1            |
| 14                                                                                   | 0                         | 1                        | 0                                              | 0                                     | 0          | 0                 | 0                                        | 1            |
| 15                                                                                   | 0                         | 1                        | 0                                              | 0                                     | 0          | 0                 | 0                                        | 1            |
| 16                                                                                   | 0                         | 0                        | 1                                              | 0                                     | 0          | 0                 | 0                                        | 1            |
| 17                                                                                   | 0                         | 1                        | 0                                              | 0                                     | 0          | 0                 | 0                                        | 1            |
| 18                                                                                   | 0                         | 1                        | 0                                              | 0                                     | 0          | 0                 | 0                                        | 1            |
| <b>TOTAL</b>                                                                         | <b>0</b>                  | <b>15</b>                | <b>2</b>                                       | <b>0</b>                              | <b>1</b>   | <b>0</b>          | <b>0</b>                                 | <b>18</b>    |
| <b>PERCENTAGE</b>                                                                    | <b>0.0</b>                | <b>83.3</b>              | <b>11.1</b>                                    | <b>0.0</b>                            | <b>5.6</b> | <b>0.0</b>        | <b>0.0</b>                               | <b>100.0</b> |
| Stat. sig. Wwc2 KD (rescue) vs. con. siRNA embryo †p<0.05, ‡‡p<0.005                 |                           | ‡‡                       | ‡‡                                             |                                       | ‡‡         |                   |                                          |              |
| p-value (2-tailed students t-test)                                                   | n/a                       | 7.98E-01                 | 8.51E-01                                       | n/a                                   | 3.70E-01   | n/a               | n/a                                      | n/a          |
| Stat. sig. Wwc2 KD (rescue) vs. Wwc2 siRNA embryo *p<0.05, **p<0.005                 |                           | *                        |                                                |                                       |            |                   |                                          |              |
| p-value (2-tailed students t-test)                                                   | n/a                       | 1.43E-02                 | 2.18E-01                                       | 1.54E-01                              | 3.02E-01   | n/a               | n/a                                      | n/a          |

| Control siRNA microinjected GV stage (+18h IBMX & 12h post IBMX wash-out) |                           |                          |                                                |                                       |            |                   |                                          |             |
|---------------------------------------------------------------------------|---------------------------|--------------------------|------------------------------------------------|---------------------------------------|------------|-------------------|------------------------------------------|-------------|
| #                                                                         | Meiotic spindle status    |                          |                                                |                                       |            |                   | 1 <sup>st</sup> meiotic polar body (PB1) |             |
|                                                                           | Normal MI arrested (+PB1) | Normal MI stage (no PB1) | Defective (e.g. dispersed chromosomes, no PB1) | Absent with ultra condensed chromatin | GV intact  | GVBD (no spindle) | Present                                  | Absent      |
| 1                                                                         | 1                         | 0                        | 0                                              | 0                                     | 0          | 0                 | 1                                        | 0           |
| 2                                                                         | 1                         | 0                        | 0                                              | 0                                     | 0          | 0                 | 1                                        | 0           |
| 3                                                                         | 0                         | 1                        | 0                                              | 0                                     | 0          | 0                 | 0                                        | 1           |
| 4                                                                         | 0                         | 1                        | 0                                              | 0                                     | 0          | 0                 | 0                                        | 1           |
| 5                                                                         | 1                         | 0                        | 0                                              | 0                                     | 0          | 0                 | 1                                        | 0           |
| 6                                                                         | 1                         | 0                        | 0                                              | 0                                     | 0          | 0                 | 1                                        | 0           |
| 7                                                                         | 1                         | 0                        | 0                                              | 0                                     | 0          | 0                 | 1                                        | 0           |
| 8                                                                         | 1                         | 0                        | 0                                              | 0                                     | 0          | 0                 | 1                                        | 0           |
| 9                                                                         | 1                         | 0                        | 0                                              | 0                                     | 0          | 0                 | 1                                        | 0           |
| 10                                                                        | 1                         | 0                        | 0                                              | 0                                     | 0          | 0                 | 1                                        | 0           |
| 11                                                                        | 1                         | 0                        | 0                                              | 0                                     | 0          | 0                 | 1                                        | 0           |
| 12                                                                        | 0                         | 1                        | 0                                              | 0                                     | 0          | 0                 | 0                                        | 1           |
| 13                                                                        | 1                         | 0                        | 0                                              | 0                                     | 0          | 0                 | 1                                        | 0           |
| 14                                                                        | 1                         | 0                        | 0                                              | 0                                     | 0          | 0                 | 1                                        | 0           |
| 15                                                                        | 0                         | 1                        | 0                                              | 0                                     | 0          | 0                 | 0                                        | 1           |
| <b>TOTAL</b>                                                              | <b>11</b>                 | <b>4</b>                 | <b>0</b>                                       | <b>0</b>                              | <b>0</b>   | <b>0</b>          | <b>11</b>                                | <b>4</b>    |
| <b>PERCENTAGE</b>                                                         | <b>73.3</b>               | <b>26.7</b>              | <b>0.0</b>                                     | <b>0.0</b>                            | <b>0.0</b> | <b>0.0</b>        | <b>73.3</b>                              | <b>26.7</b> |

| Wwc2 siRNA microinjected GV stage (+18h IBMX & 12h post IBMX wash-out) |                           |                          |                                                |                                       |            |                   |                                          |             |
|------------------------------------------------------------------------|---------------------------|--------------------------|------------------------------------------------|---------------------------------------|------------|-------------------|------------------------------------------|-------------|
| #                                                                      | Meiotic spindle status    |                          |                                                |                                       |            |                   | 1 <sup>st</sup> meiotic polar body (PB1) |             |
|                                                                        | Normal MI arrested (+PB1) | Normal MI stage (no PB1) | Defective (e.g. dispersed chromosomes, no PB1) | Absent with ultra condensed chromatin | GV intact  | GVBD (no spindle) | Present                                  | Absent      |
| 1                                                                      | 0                         | 0                        | 0                                              | 1                                     | 0          | 0                 | 0                                        | 1           |
| 2                                                                      | 1                         | 0                        | 0                                              | 0                                     | 0          | 0                 | 1                                        | 0           |
| 3                                                                      | 0                         | 0                        | 1                                              | 0                                     | 0          | 0                 | 0                                        | 1           |
| 4                                                                      | 0                         | 0                        | 1                                              | 0                                     | 0          | 0                 | 0                                        | 1           |
| 5                                                                      | 0                         | 1                        | 0                                              | 0                                     | 0          | 0                 | 0                                        | 1           |
| 6                                                                      | 0                         | 0                        | 1                                              | 0                                     | 0          | 0                 | 0                                        | 1           |
| 7                                                                      | 0                         | 1                        | 0                                              | 0                                     | 0          | 0                 | 0                                        | 1           |
| 8                                                                      | 0                         | 1                        | 0                                              | 0                                     | 0          | 0                 | 0                                        | 1           |
| 9                                                                      | 0                         | 0                        | 1                                              | 0                                     | 0          | 0                 | 0                                        | 1           |
| 10                                                                     | 0                         | 1                        | 0                                              | 0                                     | 0          | 0                 | 0                                        | 1           |
| 11                                                                     | 0                         | 0                        | 0                                              | 1                                     | 0          | 0                 | 0                                        | 1           |
| 12                                                                     | 1                         | 0                        | 0                                              | 0                                     | 0          | 0                 | 1                                        | 0           |
| 13                                                                     | 0                         | 1                        | 0                                              | 0                                     | 0          | 0                 | 0                                        | 1           |
| 14                                                                     | 0                         | 1                        | 0                                              | 0                                     | 0          | 0                 | 0                                        | 1           |
| 15                                                                     | 0                         | 1                        | 0                                              | 0                                     | 0          | 0                 | 0                                        | 1           |
| 16                                                                     | 0                         | 1                        | 0                                              | 0                                     | 0          | 0                 | 0                                        | 1           |
| 17                                                                     | 0                         | 0                        | 1                                              | 0                                     | 0          | 0                 | 0                                        | 1           |
| 18                                                                     | 0                         | 0                        | 0                                              | 1                                     | 0          | 0                 | 0                                        | 1           |
| <b>TOTAL</b>                                                           | <b>2</b>                  | <b>8</b>                 | <b>5</b>                                       | <b>3</b>                              | <b>0</b>   | <b>0</b>          | <b>2</b>                                 | <b>16</b>   |
| <b>PERCENTAGE</b>                                                      | <b>11.1</b>               | <b>44.4</b>              | <b>27.8</b>                                    | <b>16.7</b>                           | <b>0.0</b> | <b>0.0</b>        | <b>11.1</b>                              | <b>88.9</b> |
| Stat. sig. Wwc2 siRNA vs. con. siRNA embryo †p<0.05, ‡‡p<0.005         | **                        |                          | ‡                                              |                                       |            |                   | **                                       | **          |
| p-value (2-tailed students t-test)                                     | 7.43E-05                  | 3.05E-01                 | 2.66E-02                                       | 1.03E-01                              | n/a        | n/a               | 7.43E-05                                 | 7.43E-05    |

| Wwc2 siRNA + Wwc2-HA mRNA microinjected GV stage (+18h IBMX & 12h post IBMX wash-out) |                           |                          |                                                |                                       |            |                   |                                          |             |
|---------------------------------------------------------------------------------------|---------------------------|--------------------------|------------------------------------------------|---------------------------------------|------------|-------------------|------------------------------------------|-------------|
| #                                                                                     | Meiotic spindle status    |                          |                                                |                                       |            |                   | 1 <sup>st</sup> meiotic polar body (PB1) |             |
|                                                                                       | Normal MI arrested (+PB1) | Normal MI stage (no PB1) | Defective (e.g. dispersed chromosomes, no PB1) | Absent with ultra condensed chromatin | GV intact  | GVBD (no spindle) | Present                                  | Absent      |
| 1                                                                                     | 0                         | 1                        | 0                                              | 0                                     | 0          | 0                 | 0                                        | 1           |
| 2                                                                                     | 1                         | 0                        | 0                                              | 0                                     | 0          | 0                 | 1                                        | 0           |
| 3                                                                                     | 0                         | 1                        | 0                                              | 0                                     | 0          | 0                 | 0                                        | 1           |
| 4                                                                                     | 1                         | 0                        | 0                                              | 0                                     | 0          | 0                 | 1                                        | 0           |
| 5                                                                                     | 1                         | 0                        | 0                                              | 0                                     | 0          | 0                 | 1                                        | 0           |
| 6                                                                                     | 0                         | 1                        | 0                                              | 0                                     | 0          | 0                 | 0                                        | 1           |
| 7                                                                                     | 1                         | 0                        | 0                                              | 0                                     | 0          | 0                 | 1                                        | 0           |
| 8                                                                                     | 1                         | 0                        | 0                                              | 0                                     | 0          | 0                 | 1                                        | 0           |
| 9                                                                                     | 1                         | 0                        | 0                                              | 0                                     | 0          | 0                 | 1                                        | 0           |
| 10                                                                                    | 1                         | 0                        | 0                                              | 0                                     | 0          | 0                 | 1                                        | 0           |
| 11                                                                                    | 1                         | 0                        | 0                                              | 0                                     | 0          | 0                 | 1                                        | 0           |
| 12                                                                                    | 1                         | 0                        | 0                                              | 0                                     | 0          | 0                 | 1                                        | 0           |
| 13                                                                                    | 1                         | 0                        | 0                                              | 0                                     | 0          | 0                 | 1                                        | 0           |
| 14                                                                                    | 1                         | 0                        | 0                                              | 0                                     | 0          | 0                 | 1                                        | 0           |
| 15                                                                                    | 0                         | 0                        | 1                                              | 0                                     | 0          | 0                 | 0                                        | 1           |
| 16                                                                                    | 0                         | 0                        | 1                                              | 0                                     | 0          | 0                 | 0                                        | 1           |
| 17                                                                                    | 1                         | 0                        | 0                                              | 0                                     | 0          | 0                 | 1                                        | 0           |
| <b>TOTAL</b>                                                                          | <b>12</b>                 | <b>3</b>                 | <b>2</b>                                       | <b>0</b>                              | <b>0</b>   | <b>0</b>          | <b>12</b>                                | <b>5</b>    |
| <b>PERCENTAGE</b>                                                                     | <b>70.6</b>               | <b>17.6</b>              | <b>11.8</b>                                    | <b>0.0</b>                            | <b>0.0</b> | <b>0.0</b>        | <b>70.6</b>                              | <b>29.4</b> |
| Stat. sig. Wwc2 KD (rescue) vs. con. siRNA embryo †p<0.05, ‡‡p<0.005                  |                           |                          |                                                |                                       |            |                   |                                          |             |
| p-value (2-tailed students t-test)                                                    | 8.69E-01                  | 5.53E-01                 | 1.81E-01                                       | n/a                                   | n/a        | n/a               | 8.69E-01                                 | 8.69E-01    |
| Stat. sig. Wwc2 KD (rescue) vs. Wwc2 siRNA embryo *p<0.05, **p<0.005                  | **                        |                          |                                                |                                       |            |                   | **                                       | **          |
| p-value (2-tailed students t-test)                                                    | 1.11E-04                  | 9.28E-02                 | 2.49E-01                                       | 8.26E-02                              | n/a        | n/a               | 1.11E-04                                 | 1.11E-04    |

| Control siRNA microinjected GV stage (+18h IBMX & 16h post IBMX wash-out) |                           |                          |                                                |                                       |            |                   |                                          |             |
|---------------------------------------------------------------------------|---------------------------|--------------------------|------------------------------------------------|---------------------------------------|------------|-------------------|------------------------------------------|-------------|
| #                                                                         | Meiotic spindle status    |                          |                                                |                                       |            |                   | 1 <sup>st</sup> meiotic polar body (PB1) |             |
|                                                                           | Normal MI arrested (+PB1) | Normal MI stage (no PB1) | Defective (e.g. dispersed chromosomes, no PB1) | Absent with ultra condensed chromatin | GV intact  | GVBD (no spindle) | Present                                  | Absent      |
| 1                                                                         | 0                         | 1                        | 0                                              | 0                                     | 0          | 0                 | 0                                        | 1           |
| 2                                                                         | 1                         | 0                        | 0                                              | 0                                     | 0          | 0                 | 1                                        | 0           |
| 3                                                                         | 1                         | 0                        | 0                                              | 0                                     | 0          | 0                 | 1                                        | 0           |
| 4                                                                         | 1                         | 0                        | 0                                              | 0                                     | 0          | 0                 | 1                                        | 0           |
| 5                                                                         | 1                         | 0                        | 0                                              | 0                                     | 0          | 0                 | 1                                        | 0           |
| 6                                                                         | 1                         | 0                        | 0                                              | 0                                     | 0          | 0                 | 1                                        | 0           |
| 7                                                                         | 1                         | 0                        | 0                                              | 0                                     | 0          | 0                 | 1                                        | 0           |
| 8                                                                         | 1                         | 0                        | 0                                              | 0                                     | 0          | 0                 | 1                                        | 0           |
| 9                                                                         | 1                         | 0                        | 0                                              | 0                                     | 0          | 0                 | 1                                        | 0           |
| 10                                                                        | 1                         | 0                        | 0                                              | 0                                     | 0          | 0                 | 1                                        | 0           |
| 11                                                                        | 1                         | 0                        | 0                                              | 0                                     | 0          | 0                 | 1                                        | 0           |
| 12                                                                        | 1                         | 0                        | 0                                              | 0                                     | 0          | 0                 | 1                                        | 0           |
| 13                                                                        | 1                         | 0                        | 0                                              | 0                                     | 0          | 0                 | 1                                        | 0           |
| 14                                                                        | 0                         | 1                        | 0                                              | 0                                     | 0          | 0                 | 0                                        | 1           |
| 15                                                                        | 0                         | 1                        | 0                                              | 0                                     | 0          | 0                 | 0                                        | 1           |
| 16                                                                        | 1                         | 0                        | 0                                              | 0                                     | 0          | 0                 | 1                                        | 0           |
| 17                                                                        | 0                         | 0                        | 1                                              | 0                                     | 0          | 0                 | 0                                        | 1           |
| 18                                                                        | 1                         | 0                        | 0                                              | 0                                     | 0          | 0                 | 1                                        | 0           |
| 19                                                                        | 1                         | 0                        | 0                                              | 0                                     | 0          | 0                 | 1                                        | 0           |
| 20                                                                        | 1                         | 0                        | 0                                              | 0                                     | 0          | 0                 | 1                                        | 0           |
| 21                                                                        | 1                         | 0                        | 0                                              | 0                                     | 0          | 0                 | 1                                        | 0           |
| 22                                                                        | 1                         | 0                        | 0                                              | 0                                     | 0          | 0                 | 1                                        | 0           |
| <b>TOTAL</b>                                                              | <b>18</b>                 | <b>3</b>                 | <b>1</b>                                       | <b>0</b>                              | <b>0</b>   | <b>0</b>          | <b>18</b>                                | <b>4</b>    |
| <b>PERCENTAGE</b>                                                         | <b>81.8</b>               | <b>13.6</b>              | <b>4.5</b>                                     | <b>0.0</b>                            | <b>0.0</b> | <b>0.0</b>        | <b>81.8</b>                              | <b>18.2</b> |

| Wwc2 siRNA microinjected GV stage (+18h IBMX & 16h post IBMX wash-out) |                           |                          |                                                |                                       |            |                   |                                          |             |
|------------------------------------------------------------------------|---------------------------|--------------------------|------------------------------------------------|---------------------------------------|------------|-------------------|------------------------------------------|-------------|
| #                                                                      | Meiotic spindle status    |                          |                                                |                                       |            |                   | 1 <sup>st</sup> meiotic polar body (PB1) |             |
|                                                                        | Normal MI arrested (+PB1) | Normal MI stage (no PB1) | Defective (e.g. dispersed chromosomes, no PB1) | Absent with ultra condensed chromatin | GV intact  | GVBD (no spindle) | Present                                  | Absent      |
| 1                                                                      | 0                         | 0                        | 1                                              | 0                                     | 0          | 0                 | 0                                        | 1           |
| 2                                                                      | 0                         | 0                        | 0                                              | 1                                     | 0          | 0                 | 0                                        | 1           |
| 3                                                                      | 0                         | 0                        | 0                                              | 1                                     | 0          | 0                 | 0                                        | 1           |
| 4                                                                      | 0                         | 1                        | 0                                              | 0                                     | 0          | 0                 | 0                                        | 1           |
| 5                                                                      | 0                         | 0                        | 1                                              | 0                                     | 0          | 0                 | 0                                        | 1           |
| 6                                                                      | 0                         | 1                        | 0                                              | 0                                     | 0          | 0                 | 0                                        | 1           |
| 7                                                                      | 0                         | 0                        | 0                                              | 1                                     | 0          | 0                 | 0                                        | 1           |
| 8                                                                      | 0                         | 0                        | 1                                              | 0                                     | 0          | 0                 | 0                                        | 1           |
| 9                                                                      | 0                         | 0                        | 1                                              | 0                                     | 0          | 0                 | 0                                        | 1           |
| 10                                                                     | 0                         | 1                        | 0                                              | 0                                     | 0          | 0                 | 0                                        | 1           |
| 11                                                                     | 0                         | 1                        | 0                                              | 0                                     | 0          | 0                 | 0                                        | 1           |
| 12                                                                     | 0                         | 1                        | 0                                              | 0                                     | 0          | 0                 | 0                                        | 1           |
| 13                                                                     | 0                         | 1                        | 0                                              | 0                                     | 0          | 0                 | 0                                        | 1           |
| 14                                                                     | 1                         | 0                        | 0                                              | 0                                     | 0          | 0                 | 1                                        | 0           |
| 15                                                                     | 1                         | 0                        | 0                                              | 0                                     | 0          | 0                 | 1                                        | 0           |
| 16                                                                     | 0                         | 1                        | 0                                              | 0                                     | 0          | 0                 | 0                                        | 1           |
| 17                                                                     | 0                         | 0                        | 1                                              | 0                                     | 0          | 0                 | 0                                        | 1           |
| 18                                                                     | 0                         | 1                        | 0                                              | 0                                     | 0          | 0                 | 0                                        | 1           |
| 19                                                                     | 0                         | 1                        | 0                                              | 0                                     | 0          | 0                 | 0                                        | 1           |
| 20                                                                     | 0                         | 1                        | 0                                              | 0                                     | 0          | 0                 | 0                                        | 1           |
| 21                                                                     | 0                         | 0                        | 1                                              | 0                                     | 0          | 0                 | 0                                        | 1           |
| 22                                                                     | 0                         | 0                        | 0                                              | 1                                     | 0          | 0                 | 0                                        | 1           |
| 23                                                                     | 0                         | 0                        | 0                                              | 1                                     | 0          | 0                 | 0                                        | 1           |
| <b>TOTAL</b>                                                           | <b>2</b>                  | <b>10</b>                | <b>6</b>                                       | <b>5</b>                              | <b>0</b>   | <b>0</b>          | <b>2</b>                                 | <b>21</b>   |
| <b>PERCENTAGE</b>                                                      | <b>8.7</b>                | <b>43.5</b>              | <b>26.1</b>                                    | <b>21.7</b>                           | <b>0.0</b> | <b>0.0</b>        | <b>8.7</b>                               | <b>91.3</b> |
| Stat. sig. Wwc2 siRNA vs. con. siRNA embryo †p<0.05, ‡†p<0.005         | ‡‡                        | ‡                        | ‡                                              | ‡                                     |            |                   | ‡‡                                       | ‡‡          |
| p-value (2-tailed students t-test)                                     | 8.61E-09                  | 2.73E-02                 | 4.75E-02                                       | 2.00E-02                              | n/a        | n/a               | 8.61E-09                                 | 8.61E-09    |

| Wwc2 siRNA + Wwc2-HA mRNA microinjected GV stage (+18h IBMX & 16h post IBMX wash-out) |                           |                          |                                                |                                       |            |                   |                                          |             |
|---------------------------------------------------------------------------------------|---------------------------|--------------------------|------------------------------------------------|---------------------------------------|------------|-------------------|------------------------------------------|-------------|
| #                                                                                     | Meiotic spindle status    |                          |                                                |                                       |            |                   | 1 <sup>st</sup> meiotic polar body (PB1) |             |
|                                                                                       | Normal MI arrested (+PB1) | Normal MI stage (no PB1) | Defective (e.g. dispersed chromosomes, no PB1) | Absent with ultra condensed chromatin | GV intact  | GVBD (no spindle) | Present                                  | Absent      |
| 1                                                                                     | 0                         | 0                        | 1                                              | 0                                     | 0          | 0                 | 0                                        | 1           |
| 2                                                                                     | 1                         | 0                        | 0                                              | 0                                     | 0          | 0                 | 1                                        | 0           |
| 3                                                                                     | 0                         | 1                        | 0                                              | 0                                     | 0          | 0                 | 0                                        | 1           |
| 4                                                                                     | 0                         | 0                        | 1                                              | 0                                     | 0          | 0                 | 0                                        | 1           |
| 5                                                                                     | 1                         | 0                        | 0                                              | 0                                     | 0          | 0                 | 1                                        | 0           |
| 6                                                                                     | 1                         | 0                        | 0                                              | 0                                     | 0          | 0                 | 1                                        | 0           |
| 7                                                                                     | 1                         | 0                        | 0                                              | 0                                     | 0          | 0                 | 1                                        | 0           |
| 8                                                                                     | 0                         | 1                        | 0                                              | 0                                     | 0          | 0                 | 0                                        | 1           |
| 9                                                                                     | 1                         | 0                        | 0                                              | 0                                     | 0          | 0                 | 1                                        | 0           |
| 10                                                                                    | 1                         | 0                        | 0                                              | 0                                     | 0          | 0                 | 1                                        | 0           |
| 11                                                                                    | 0                         | 1                        | 0                                              | 0                                     | 0          | 0                 | 0                                        | 1           |
| 12                                                                                    | 1                         | 0                        | 0                                              | 0                                     | 0          | 0                 | 1                                        | 0           |
| 13                                                                                    | 1                         | 0                        | 0                                              | 0                                     | 0          | 0                 | 1                                        | 0           |
| 14                                                                                    | 1                         | 0                        | 0                                              | 0                                     | 0          | 0                 | 1                                        | 0           |
| 15                                                                                    | 1                         | 0                        | 0                                              | 0                                     | 0          | 0                 | 1                                        | 0           |
| 16                                                                                    | 0                         | 1                        | 0                                              | 0                                     | 0          | 0                 | 0                                        | 1           |
| 17                                                                                    | 1                         | 0                        | 0                                              | 0                                     | 0          | 0                 | 1                                        | 0           |
| 18                                                                                    | 1                         | 0                        | 0                                              | 0                                     | 0          | 0                 | 1                                        | 0           |
| 19                                                                                    | 1                         | 0                        | 0                                              | 0                                     | 0          | 0                 | 1                                        | 0           |
| 20                                                                                    | 1                         | 0                        | 0                                              | 0                                     | 0          | 0                 | 1                                        | 0           |
| 21                                                                                    | 1                         | 0                        | 0                                              | 0                                     | 0          | 0                 | 1                                        | 0           |
| 22                                                                                    | 1                         | 0                        | 0                                              | 0                                     | 0          | 0                 | 1                                        | 0           |
| 23                                                                                    | 1                         | 0                        | 0                                              | 0                                     | 0          | 0                 | 1                                        | 0           |
| 24                                                                                    | 1                         | 0                        | 0                                              | 0                                     | 0          | 0                 | 1                                        | 0           |
| 25                                                                                    | 1                         | 0                        | 0                                              | 0                                     | 0          | 0                 | 1                                        | 0           |
| <b>TOTAL</b>                                                                          | <b>19</b>                 | <b>4</b>                 | <b>2</b>                                       | <b>0</b>                              | <b>0</b>   | <b>0</b>          | <b>19</b>                                | <b>6</b>    |
| <b>PERCENTAGE</b>                                                                     | <b>76.0</b>               | <b>16.0</b>              | <b>8.0</b>                                     | <b>0.0</b>                            | <b>0.0</b> | <b>0.0</b>        | <b>76.0</b>                              | <b>24.0</b> |
| Stat. sig. Wwc2 KD (rescue) vs. con. siRNA embryo †p<0.05, ‡†p<0.005                  |                           |                          |                                                | #DIV/0!                               | n/a        | n/a               |                                          |             |
| p-value (2-tailed students t-test)                                                    | 6.36E-01                  | 8.25E-01                 | 6.38E-01                                       | #DIV/0!                               | n/a        | n/a               | 6.36E-01                                 | 6.36E-01    |
| Stat. sig. Wwc2 KD (rescue) vs. Wwc2 siRNA embryo †p<0.05, **p<0.005                  | **                        | *                        | *                                              | *                                     |            |                   | **                                       | **          |
| p-value (2-tailed students t-test)                                                    | 1.21E-07                  | 3.70E-02                 | 9.68E-02                                       | 1.31E-02                              | n/a        | n/a               | 1.21E-07                                 | 1.21E-07    |

| Control siRNA (10μM), 1in2 micro-injection, >64-cell (E4.5) stage, anti-CDX2 & anti-NANOG |                              |                         |                             |                     |             |          |                 |          |             |             |          |          |          |                    |                     |             |          |                 |          |          |             |         |         |          |          |             |     |     |     |   |
|-------------------------------------------------------------------------------------------|------------------------------|-------------------------|-----------------------------|---------------------|-------------|----------|-----------------|----------|-------------|-------------|----------|----------|----------|--------------------|---------------------|-------------|----------|-----------------|----------|----------|-------------|---------|---------|----------|----------|-------------|-----|-----|-----|---|
| #                                                                                         | Total cell number per embryo | Cells in injected clone | Cells in non-injected clone | INJECTED CLONE      |             |          |                 |          |             |             |          |          |          | NON INJECTED CLONE |                     |             |          |                 |          |          |             |         |         |          |          |             |     |     |     |   |
|                                                                                           |                              |                         |                             | Nuclear abnormality | OUTER CELLS |          |                 |          |             | INNER CELLS |          |          |          |                    | Nuclear abnormality | OUTER CELLS |          |                 |          |          | INNER CELLS |         |         |          |          |             |     |     |     |   |
|                                                                                           |                              |                         |                             |                     | CDX2+VE     | CDX2-VE  | CDX2 & NANOG+VE | NANOG-VE | Apoptotic ▲ | CDX2+VE     | CDX2-VE  | NANOG+VE | NANOG-VE | Apoptotic ▲        |                     | CDX2+VE     | CDX2-VE  | CDX2 & NANOG+VE | NANOG+VE | NANOG-VE | Apoptotic ▲ | CDX2+VE | CDX2-VE | NANOG+VE | NANOG-VE | Apoptotic ▲ |     |     |     |   |
| 1                                                                                         | 77                           | 37                      | 40                          | 0                   | 26          | 25       | 0               | 1        | 24          | 1           | 11       | 0        | 11       | 8                  | 3                   | 1           | 0        | 32              | 30       | 0        | 2           | 28      | 2       | 8        | 0        | 8           | 6   | 2   | 1   |   |
| 2                                                                                         | 83                           | 40                      | 43                          | 0                   | 29          | 29       | 0               | 0        | 29          | 2           | 11       | 0        | 11       | 9                  | 2                   | 0           | 0        | 33              | 32       | 0        | 1           | 31      | 1       | 10       | 0        | 10          | 5   | 5   | 1   |   |
| 3                                                                                         | 71                           | 34                      | 37                          | 0                   | 23          | 21       | 0               | 2        | 19          | 0           | 11       | 0        | 11       | 7                  | 4                   | 1           | 0        | 29              | 29       | 0        | 0           | 29      | 1       | 8        | 0        | 8           | 5   | 3   | 0   |   |
| 4                                                                                         | 84                           | 42                      | 42                          | 0                   | 32          | 32       | 0               | 0        | 32          | 0           | 10       | 0        | 10       | 7                  | 7                   | 3           | 1        | 0               | 26       | 25       | 0           | 1       | 24      | 2        | 16       | 0           | 16  | 10  | 6   | 1 |
| 5                                                                                         | 77                           | 38                      | 39                          | 0                   | 28          | 26       | 0               | 2        | 24          | 1           | 10       | 0        | 10       | 8                  | 2                   | 0           | 0        | 30              | 30       | 0        | 0           | 30      | 2       | 9        | 0        | 9           | 7   | 2   | 0   |   |
| 6                                                                                         | 81                           | 40                      | 41                          | 0                   | 27          | 26       | 0               | 1        | 25          | 0           | 13       | 0        | 13       | 9                  | 4                   | 0           | 0        | 35              | 33       | 0        | 2           | 31      | 0       | 6        | 0        | 6           | 3   | 3   | 2   |   |
| 7                                                                                         | 84                           | 43                      | 41                          | 0                   | 33          | 32       | 0               | 1        | 31          | 1           | 10       | 0        | 10       | 6                  | 4                   | 2           | 0        | 29              | 29       | 0        | 0           | 29      | 1       | 12       | 0        | 12          | 8   | 4   | 0   |   |
| 8                                                                                         | 86                           | 43                      | 43                          | 0                   | 34          | 34       | 0               | 0        | 34          | 1           | 9        | 0        | 9        | 6                  | 3                   | 1           | 0        | 30              | 27       | 0        | 3           | 24      | 2       | 13       | 0        | 13          | 10  | 3   | 0   |   |
| 9                                                                                         | 84                           | 41                      | 43                          | 0                   | 29          | 27       | 0               | 2        | 25          | 2           | 12       | 0        | 12       | 9                  | 3                   | 0           | 0        | 34              | 33       | 0        | 1           | 32      | 1       | 9        | 0        | 9           | 7   | 2   | 0   |   |
| 10                                                                                        | 77                           | 40                      | 37                          | 0                   | 30          | 29       | 0               | 1        | 28          | 1           | 10       | 0        | 10       | 6                  | 4                   | 2           | 0        | 27              | 27       | 0        | 0           | 27      | 1       | 10       | 0        | 10          | 8   | 2   | 1   |   |
| 11                                                                                        | 79                           | 41                      | 38                          | 0                   | 32          | 30       | 0               | 2        | 28          | 0           | 9        | 0        | 9        | 6                  | 3                   | 1           | 0        | 28              | 26       | 0        | 2           | 24      | 2       | 10       | 0        | 10          | 9   | 1   | 0   |   |
| TOTAL                                                                                     | 883                          | 439                     | 444                         | 0                   | 323         | 311      | 0               | 12       | 299         | 9           | 116      | 0        | 116      | 81                 | 35                  | 9           | 0        | 333             | 321      | 0        | 12          | 309     | 15      | 111      | 0        | 111         | 78  | 33  | 6   |   |
| AVERAGE                                                                                   | 80.3                         | 39.9                    | 40.4                        | 0.0                 | 29.4        | 28.3     | 0.0             | 1.1      | 27.2        | 0.8         | 10.5     | 0.0      | 10.5     | 7.6                | 3.2                 | 0.8         | 0.0      | 30.3            | 29.2     | 0.0      | 1.1         | 28.1    | 1.4     | 10.1     | 0.0      | 10.1        | 7.1 | 3.0 | 0.5 |   |
| SEM                                                                                       | 1.4                          | 0.8                     | 0.7                         | 0.0                 | 1.0         | 1.1      | 0.0             | 0.3      | 1.3         | 0.2         | 0.4      | 0.0      | 0.4      | 0.4                | 0.2                 | 0.2         | 0.0      | 0.9             | 0.8      | 0.0      | 0.3         | 0.9     | 0.2     | 0.8      | 0.0      | 0.8         | 0.7 | 0.4 | 0.2 |   |
| Stat. sig. (inter-clone) 1p<0.05, †p<0.005                                                |                              |                         |                             |                     |             |          |                 |          |             |             |          |          |          |                    |                     |             |          |                 |          |          |             |         |         |          |          |             |     |     |     |   |
| p-value (2-tailed students t-test)                                                        |                              | 6.77E-01                |                             |                     | 1.00E+00    | 5.00E-01 |                 | 5.24E-01 | 1.00E+00    | 1.00E+00    | 5.71E-01 |          | 8.81E-02 | 6.20E-01           | 1.00E+00            |             | 6.20E-01 | 7.27E-01        | 7.21E-01 |          | 3.85E-01    |         |         |          |          |             |     |     |     |   |

| Wwc2-specific siRNA (10μM), 1in2 micro-injection, >64-cell (E4.5) stage, anti-CDX2 & anti-NANOG |                              |                         |                             |                     |             |          |                 |          |             |             |          |          |          |                    |                     |             |          |                 |          |          |             |          |          |          |          |             |          |          |          |          |
|-------------------------------------------------------------------------------------------------|------------------------------|-------------------------|-----------------------------|---------------------|-------------|----------|-----------------|----------|-------------|-------------|----------|----------|----------|--------------------|---------------------|-------------|----------|-----------------|----------|----------|-------------|----------|----------|----------|----------|-------------|----------|----------|----------|----------|
| #                                                                                               | Total cell number per embryo | Cells in injected clone | Cells in non-injected clone | INJECTED CLONE      |             |          |                 |          |             |             |          |          |          | NON INJECTED CLONE |                     |             |          |                 |          |          |             |          |          |          |          |             |          |          |          |          |
|                                                                                                 |                              |                         |                             | Nuclear abnormality | OUTER CELLS |          |                 |          |             | INNER CELLS |          |          |          |                    | Nuclear abnormality | OUTER CELLS |          |                 |          |          | INNER CELLS |          |          |          |          |             |          |          |          |          |
|                                                                                                 |                              |                         |                             |                     | CDX2+VE     | CDX2-VE  | CDX2 & NANOG+VE | NANOG-VE | Apoptotic ▲ | CDX2+VE     | CDX2-VE  | NANOG+VE | NANOG-VE | Apoptotic ▲        |                     | CDX2+VE     | CDX2-VE  | CDX2 & NANOG+VE | NANOG+VE | NANOG-VE | Apoptotic ▲ | CDX2+VE  | CDX2-VE  | NANOG+VE | NANOG-VE | Apoptotic ▲ |          |          |          |          |
| 1                                                                                               | 55                           | 22                      | 33                          | 4                   | 18          | 16       | 0               | 2        | 16          | 0           | 4        | 0        | 4        | 2                  | 2                   | 3           | 0        | 23              | 22       | 0        | 1           | 22       | 2        | 10       | 0        | 10          | 8        | 2        | 0        |          |
| 2                                                                                               | 55                           | 20                      | 35                          | 3                   | 15          | 13       | 2               | 0        | 15          | 1           | 5        | 0        | 5        | 1                  | 4                   | 4           | 0        | 24              | 23       | 0        | 1           | 23       | 1        | 11       | 0        | 11          | 7        | 4        | 1        |          |
| 3                                                                                               | 54                           | 17                      | 37                          | 0                   | 12          | 5        | 3               | 4        | 9           | 2           | 5        | 0        | 5        | 3                  | 2                   | 2           | 0        | 25              | 23       | 0        | 2           | 23       | 1        | 12       | 0        | 12          | 9        | 3        | 0        |          |
| 4                                                                                               | 65                           | 23                      | 42                          | 2                   | 20          | 16       | 3               | 1        | 19          | 0           | 3        | 0        | 3        | 0                  | 3                   | 5           | 0        | 28              | 27       | 0        | 1           | 27       | 3        | 14       | 0        | 14          | 10       | 4        | 0        |          |
| 5                                                                                               | 63                           | 20                      | 43                          | 2                   | 16          | 11       | 4               | 1        | 15          | 0           | 4        | 0        | 4        | 1                  | 3                   | 2           | 0        | 30              | 27       | 0        | 3           | 27       | 2        | 13       | 0        | 13          | 7        | 6        | 1        |          |
| 6                                                                                               | 65                           | 26                      | 39                          | 4                   | 23          | 21       | 2               | 0        | 23          | 1           | 3        | 0        | 3        | 1                  | 2                   | 4           | 0        | 27              | 26       | 0        | 1           | 26       | 2        | 12       | 0        | 12          | 9        | 3        | 0        |          |
| 7                                                                                               | 65                           | 23                      | 42                          | 2                   | 20          | 18       | 0               | 2        | 18          | 1           | 3        | 0        | 3        | 0                  | 3                   | 3           | 0        | 26              | 26       | 0        | 0           | 26       | 0        | 16       | 0        | 16          | 14       | 2        | 2        |          |
| 8                                                                                               | 66                           | 26                      | 40                          | 3                   | 22          | 18       | 3               | 1        | 21          | 2           | 4        | 0        | 4        | 1                  | 3                   | 2           | 0        | 28              | 27       | 0        | 1           | 27       | 1        | 12       | 0        | 12          | 8        | 4        | 0        |          |
| 9                                                                                               | 58                           | 18                      | 40                          | 2                   | 16          | 15       | 0               | 1        | 15          | 1           | 2        | 0        | 2        | 2                  | 0                   | 5           | 0        | 30              | 28       | 0        | 2           | 28       | 2        | 10       | 0        | 10          | 7        | 3        | 2        |          |
| 10                                                                                              | 63                           | 22                      | 41                          | 4                   | 18          | 16       | 0               | 2        | 16          | 1           | 4        | 0        | 4        | 1                  | 3                   | 2           | 0        | 32              | 32       | 0        | 0           | 32       | 1        | 9        | 0        | 9           | 7        | 2        | 0        |          |
| 11                                                                                              | 65                           | 22                      | 43                          | 3                   | 17          | 13       | 4               | 0        | 17          | 0           | 5        | 0        | 5        | 2                  | 3                   | 1           | 0        | 30              | 29       | 0        | 1           | 29       | 2        | 13       | 0        | 13          | 8        | 5        | 1        |          |
| 12                                                                                              | 67                           | 25                      | 42                          | 4                   | 21          | 13       | 6               | 2        | 19          | 2           | 4        | 0        | 4        | 2                  | 2                   | 3           | 0        | 28              | 28       | 0        | 0           | 28       | 2        | 14       | 0        | 14          | 9        | 5        | 0        |          |
| 13                                                                                              | 62                           | 23                      | 39                          | 3                   | 18          | 15       | 0               | 3        | 15          | 2           | 5        | 0        | 5        | 3                  | 2                   | 2           | 0        | 26              | 24       | 0        | 2           | 24       | 1        | 13       | 0        | 13          | 8        | 5        | 0        |          |
| 14                                                                                              | 53                           | 20                      | 33                          | 4                   | 16          | 14       | 1               | 1        | 15          | 1           | 4        | 0        | 4        | 2                  | 2                   | 4           | 0        | 23              | 23       | 0        | 0           | 23       | 1        | 10       | 0        | 10          | 8        | 2        | 1        |          |
| 15                                                                                              | 75                           | 26                      | 49                          | 3                   | 23          | 18       | 5               | 0        | 23          | 2           | 3        | 0        | 3        | 0                  | 3                   | 5           | 0        | 35              | 32       | 0        | 3           | 32       | 1        | 14       | 0        | 14          | 9        | 5        | 0        |          |
| 16                                                                                              | 64                           | 22                      | 42                          | 0                   | 18          | 17       | 0               | 1        | 17          | 1           | 4        | 0        | 4        | 1                  | 3                   | 3           | 0        | 29              | 28       | 0        | 1           | 28       | 1        | 13       | 0        | 13          | 9        | 4        | 1        |          |
| 17                                                                                              | 63                           | 23                      | 40                          | 3                   | 20          | 18       | 2               | 0        | 20          | 2           | 3        | 0        | 3        | 0                  | 3                   | 3           | 0        | 27              | 25       | 0        | 2           | 25       | 3        | 13       | 0        | 13          | 11       | 2        | 1        |          |
| 18                                                                                              | 63                           | 20                      | 43                          | 2                   | 16          | 15       | 0               | 1        | 15          | 1           | 4        | 0        | 4        | 1                  | 3                   | 2           | 0        | 30              | 30       | 0        | 0           | 30       | 1        | 13       | 0        | 13          | 7        | 6        | 0        |          |
| 19                                                                                              | 65                           | 26                      | 39                          | 4                   | 23          | 17       | 4               | 2        | 21          | 2           | 3        | 0        | 3        | 1                  | 2                   | 3           | 0        | 27              | 26       | 0        | 1           | 26       | 1        | 12       | 0        | 12          | 9        | 3        | 0        |          |
| TOTAL                                                                                           | 1186                         | 424                     | 762                         | 52                  | 352         | 289      | 39              | 24       | 328         | 22          | 72       | 0        | 72       | 24                 | 48                  | 58          | 0        | 528             | 506      | 0        | 22          | 506      | 28       | 234      | 0        | 234         | 164      | 70       | 10       |          |
| AVERAGE                                                                                         | 62.4                         | 22.3                    | 40.1                        | 2.7                 | 18.5        | 15.2     | 2.1             | 1.9      | 17.3        | 1.2         | 3.8      | 0.0      | 3.8      | 1.3                | 2.5                 | 3.1         | 0.0      | 27.8            | 26.6     | 0.0      | 1.2         | 26.6     | 1.5      | 12.3     | 0.0      | 12.3        | 8.6      | 3.7      | 0.5      |          |
| SEM                                                                                             | 1.2                          | 0.6                     | 0.9                         | 0.3                 | 0.7         | 0.8      | 0.4             | 0.3      | 0.8         | 0.2         | 0.2      | 0.0      | 0.2      | 0.2                | 0.2                 | 0.3         | 0.0      | 0.7             | 0.7      | 0.0      | 0.2         | 0.7      | 0.2      | 0.4      | 0.0      | 0.4         | 0.3      | 0.2      | 0.2      |          |
| Stat. sig. (inter-clone) 1p<0.05, †p<0.005                                                      |                              |                         |                             |                     |             |          |                 |          |             |             |          |          |          |                    |                     |             |          |                 |          |          |             |          |          |          |          |             |          |          |          |          |
| p-value (2-tailed students t-test)                                                              |                              | 1.82E-18                |                             |                     | 3.66E-11    | 3.77E-13 |                 | 5.52E-05 | 7.55E-01    | 1.32E-10    |          | 1.61E-20 | 1.00E+00 | 1.61E-20           | 2.24E-18            | 3.47E-03    |          | 1.45E-09        |          |          |             |          |          |          |          |             |          |          |          |          |
| Stat. sig. (exp. vs. con embryo) 1p<0.05, **p<0.005                                             |                              | **                      |                             |                     | **          | **       |                 | **       | **          | **          |          | **       | **       | **                 | *                   | **          |          | **              | *        | *        | *           | *        | *        | *        | *        | *           | *        | *        | *        | *        |
| p-value (2-tailed students t-test)                                                              |                              | 4.80E-10                | 2.16E-16                    | 8.40E-01            | 6.57E-08    | 7.58E-10 | 1.74E-10        | 1.78E-03 | 6.56E-01    | 2.11E-07    | 2.48E-01 | 7.62E-17 | 1.00E+00 | 7.62E-17           | 6.44E-15            | 4.16E-02    | 4.80E-06 | 1.00E+00        | 3.72E-02 | 2.56E-02 | 1.00E+00    | 8.60E-01 | 2.00E-01 | 6.97E-01 | 1.07E-02 | 1.00E+00    | 1.07E-02 | 4.14E-02 | 2.13E-01 | 9.42E-01 |





Supplementary Tables ST23

| Control siRNA (10 $\mu$ M), 1in2 micro-injection, 32-cell (E3.5) stage, anti-CDX2 |                              |                         |                             |                     |             |             |             |            |                     |             |                    |             |             |            |            |            |            |
|-----------------------------------------------------------------------------------|------------------------------|-------------------------|-----------------------------|---------------------|-------------|-------------|-------------|------------|---------------------|-------------|--------------------|-------------|-------------|------------|------------|------------|------------|
| #                                                                                 | Total cell number per embryo | Cells in injected clone | Cells in non-injected clone | INJECTED CLONE      |             |             |             |            |                     |             | NON INJECTED CLONE |             |             |            |            |            |            |
|                                                                                   |                              |                         |                             | Nuclear abnormality | OUTER CELLS |             | INNER CELLS |            | Nuclear abnormality | OUTER CELLS |                    | INNER CELLS |             |            |            |            |            |
|                                                                                   |                              |                         |                             |                     | CDX2+VE     | CDX2-VE     | CDX2+VE     | CDX2-VE    |                     | CDX2+VE     | CDX2-VE            | CDX2+VE     | CDX2-VE     |            |            |            |            |
| 1                                                                                 | 33                           | 16                      | 17                          | 0                   | 9           | 9           | 0           | 7          | 0                   | 7           | 0                  | 9           | 9           | 0          | 8          | 0          | 8          |
| 2                                                                                 | 31                           | 16                      | 15                          | 0                   | 11          | 11          | 0           | 5          | 0                   | 5           | 0                  | 9           | 9           | 0          | 6          | 0          | 6          |
| 3                                                                                 | 31                           | 15                      | 16                          | 0                   | 8           | 8           | 0           | 7          | 0                   | 7           | 0                  | 8           | 8           | 0          | 8          | 0          | 8          |
| 4                                                                                 | 39                           | 20                      | 19                          | 0                   | 11          | 11          | 0           | 9          | 0                   | 9           | 0                  | 12          | 12          | 0          | 7          | 0          | 7          |
| 5                                                                                 | 32                           | 15                      | 17                          | 0                   | 9           | 9           | 0           | 6          | 0                   | 6           | 0                  | 8           | 8           | 0          | 9          | 0          | 9          |
| 6                                                                                 | 39                           | 22                      | 17                          | 0                   | 14          | 14          | 0           | 8          | 0                   | 8           | 0                  | 12          | 12          | 0          | 5          | 0          | 5          |
| 7                                                                                 | 33                           | 17                      | 16                          | 0                   | 12          | 12          | 0           | 5          | 0                   | 5           | 0                  | 9           | 9           | 0          | 7          | 0          | 7          |
| 8                                                                                 | 41                           | 21                      | 20                          | 0                   | 12          | 12          | 0           | 9          | 0                   | 9           | 0                  | 11          | 11          | 0          | 9          | 0          | 9          |
| 9                                                                                 | 32                           | 16                      | 16                          | 0                   | 10          | 10          | 0           | 6          | 0                   | 6           | 0                  | 9           | 9           | 0          | 7          | 0          | 7          |
| 10                                                                                | 32                           | 16                      | 16                          | 0                   | 8           | 8           | 0           | 8          | 0                   | 8           | 0                  | 8           | 8           | 0          | 8          | 0          | 8          |
| 11                                                                                | 36                           | 18                      | 18                          | 0                   | 10          | 10          | 0           | 8          | 0                   | 8           | 0                  | 11          | 11          | 0          | 7          | 0          | 7          |
| 12                                                                                | 42                           | 22                      | 20                          | 0                   | 13          | 13          | 0           | 9          | 0                   | 9           | 0                  | 12          | 12          | 0          | 8          | 0          | 8          |
| 13                                                                                | 44                           | 24                      | 20                          | 0                   | 16          | 16          | 0           | 8          | 0                   | 8           | 0                  | 14          | 14          | 0          | 6          | 0          | 6          |
| 14                                                                                | 35                           | 18                      | 17                          | 0                   | 11          | 11          | 0           | 7          | 0                   | 7           | 0                  | 9           | 9           | 0          | 8          | 0          | 8          |
| <b>TOTAL</b>                                                                      | <b>500</b>                   | <b>256</b>              | <b>244</b>                  | <b>0</b>            | <b>154</b>  | <b>154</b>  | <b>0</b>    | <b>102</b> | <b>0</b>            | <b>102</b>  | <b>0</b>           | <b>141</b>  | <b>141</b>  | <b>0</b>   | <b>103</b> | <b>0</b>   | <b>103</b> |
| <b>AVERAGE</b>                                                                    | <b>35.7</b>                  | <b>18.3</b>             | <b>17.4</b>                 | <b>0.0</b>          | <b>11.0</b> | <b>11.0</b> | <b>0.0</b>  | <b>7.3</b> | <b>0.0</b>          | <b>7.3</b>  | <b>0.0</b>         | <b>10.1</b> | <b>10.1</b> | <b>0.0</b> | <b>7.4</b> | <b>0.0</b> | <b>7.4</b> |
| <b>SEM</b>                                                                        | <b>1.0</b>                   | <b>0.7</b>              | <b>0.4</b>                  | <b>0.0</b>          | <b>0.5</b>  | <b>0.5</b>  | <b>0.0</b>  | <b>0.4</b> | <b>0.0</b>          | <b>0.4</b>  | <b>0.0</b>         | <b>0.4</b>  | <b>0.4</b>  | <b>0.0</b> | <b>0.3</b> | <b>0.0</b> | <b>0.3</b> |
| Stat. sig. (inter-clone) #p<0.05, ##p<0.005                                       |                              |                         |                             |                     |             |             |             |            |                     |             |                    |             |             |            |            |            |            |
| p-value (2-tailed students t-test)                                                |                              | 3.57E-01                |                             | 1.00E+00            | 2.53E-01    | 2.53E-01    | 1.00E+00    | 8.83E-01   | 1.00E+00            | 8.83E-01    |                    |             |             |            |            |            |            |

| Wwc2-specific siRNA (10 $\mu$ M), 1in2 micro-injection, 32-cell (E3.5) stage, anti-CDX2 |                              |                         |                             |                     |             |            |             |            |                     |             |                    |             |             |            |            |            |            |          |
|-----------------------------------------------------------------------------------------|------------------------------|-------------------------|-----------------------------|---------------------|-------------|------------|-------------|------------|---------------------|-------------|--------------------|-------------|-------------|------------|------------|------------|------------|----------|
| #                                                                                       | Total cell number per embryo | Cells in injected clone | Cells in non-injected clone | INJECTED CLONE      |             |            |             |            |                     |             | NON INJECTED CLONE |             |             |            |            |            |            |          |
|                                                                                         |                              |                         |                             | Nuclear abnormality | OUTER CELLS |            | INNER CELLS |            | Nuclear abnormality | OUTER CELLS |                    | INNER CELLS |             |            |            |            |            |          |
|                                                                                         |                              |                         |                             |                     | CDX2+VE     | CDX2-VE    | CDX2+VE     | CDX2-VE    |                     | CDX2+VE     | CDX2-VE            | CDX2+VE     | CDX2-VE     |            |            |            |            |          |
| 1                                                                                       | 33                           | 11                      | 22                          | 1                   | 9           | 6          | 3           | 2          | 0                   | 2           | 0                  | 14          | 14          | 0          | 8          | 0          | 8          |          |
| 2                                                                                       | 32                           | 13                      | 19                          | 2                   | 10          | 8          | 2           | 3          | 0                   | 3           | 0                  | 12          | 12          | 0          | 7          | 0          | 7          |          |
| 3                                                                                       | 29                           | 10                      | 19                          | 0                   | 9           | 7          | 2           | 1          | 0                   | 1           | 0                  | 13          | 13          | 0          | 6          | 0          | 6          |          |
| 4                                                                                       | 29                           | 11                      | 18                          | 0                   | 9           | 6          | 3           | 2          | 0                   | 2           | 0                  | 11          | 11          | 0          | 7          | 0          | 7          |          |
| 5                                                                                       | 34                           | 12                      | 22                          | 1                   | 10          | 10         | 0           | 2          | 0                   | 2           | 0                  | 13          | 13          | 0          | 9          | 0          | 9          |          |
| 6                                                                                       | 28                           | 10                      | 18                          | 0                   | 10          | 8          | 2           | 0          | 0                   | 0           | 0                  | 12          | 12          | 0          | 6          | 0          | 6          |          |
| 7                                                                                       | 35                           | 11                      | 24                          | 0                   | 9           | 6          | 3           | 2          | 0                   | 2           | 0                  | 16          | 16          | 0          | 8          | 0          | 8          |          |
| 8                                                                                       | 28                           | 10                      | 18                          | 2                   | 7           | 7          | 0           | 3          | 0                   | 3           | 0                  | 12          | 12          | 0          | 6          | 0          | 6          |          |
| 9                                                                                       | 25                           | 9                       | 16                          | 1                   | 8           | 6          | 2           | 1          | 0                   | 1           | 0                  | 11          | 11          | 0          | 5          | 0          | 5          |          |
| 10                                                                                      | 25                           | 10                      | 15                          | 0                   | 10          | 9          | 1           | 0          | 0                   | 0           | 0                  | 9           | 9           | 0          | 6          | 0          | 6          |          |
| 11                                                                                      | 29                           | 14                      | 15                          | 2                   | 12          | 9          | 3           | 2          | 0                   | 2           | 0                  | 9           | 9           | 0          | 6          | 0          | 6          |          |
| 12                                                                                      | 29                           | 13                      | 16                          | 1                   | 10          | 8          | 2           | 3          | 0                   | 3           | 0                  | 8           | 8           | 0          | 8          | 0          | 8          |          |
| 13                                                                                      | 34                           | 14                      | 20                          | 2                   | 12          | 9          | 3           | 2          | 0                   | 2           | 0                  | 13          | 13          | 0          | 7          | 0          | 7          |          |
| 14                                                                                      | 30                           | 11                      | 19                          | 0                   | 11          | 10         | 1           | 0          | 0                   | 0           | 0                  | 11          | 11          | 0          | 8          | 0          | 8          |          |
| 15                                                                                      | 31                           | 13                      | 18                          | 0                   | 12          | 8          | 4           | 1          | 0                   | 1           | 0                  | 12          | 12          | 0          | 6          | 0          | 6          |          |
| 16                                                                                      | 35                           | 11                      | 24                          | 2                   | 9           | 6          | 3           | 2          | 0                   | 2           | 0                  | 16          | 16          | 0          | 8          | 0          | 8          |          |
| 17                                                                                      | 26                           | 9                       | 17                          | 0                   | 8           | 8          | 0           | 1          | 0                   | 1           | 0                  | 10          | 10          | 0          | 7          | 0          | 7          |          |
| 18                                                                                      | 28                           | 11                      | 17                          | 1                   | 9           | 7          | 2           | 2          | 0                   | 2           | 0                  | 12          | 12          | 0          | 5          | 0          | 5          |          |
| <b>TOTAL</b>                                                                            | <b>540</b>                   | <b>203</b>              | <b>337</b>                  | <b>15</b>           | <b>174</b>  | <b>138</b> | <b>36</b>   | <b>29</b>  | <b>0</b>            | <b>29</b>   | <b>0</b>           | <b>214</b>  | <b>214</b>  | <b>0</b>   | <b>123</b> | <b>0</b>   | <b>123</b> |          |
| <b>AVERAGE</b>                                                                          | <b>30.0</b>                  | <b>11.3</b>             | <b>18.7</b>                 | <b>0.8</b>          | <b>9.7</b>  | <b>7.7</b> | <b>2.0</b>  | <b>1.6</b> | <b>0.0</b>          | <b>1.6</b>  | <b>0.0</b>         | <b>11.9</b> | <b>11.9</b> | <b>0.0</b> | <b>6.8</b> | <b>0.0</b> | <b>6.8</b> |          |
| <b>SEM</b>                                                                              | <b>0.8</b>                   | <b>0.4</b>              | <b>0.7</b>                  | <b>0.2</b>          | <b>0.3</b>  | <b>0.3</b> | <b>0.3</b>  | <b>0.2</b> | <b>0.0</b>          | <b>0.2</b>  | <b>0.0</b>         | <b>0.5</b>  | <b>0.5</b>  | <b>0.0</b> | <b>0.3</b> | <b>0.0</b> | <b>0.3</b> |          |
| Stat. sig. (inter-clone) #p<0.05, ##p<0.005                                             |                              | ##                      |                             | ##                  | ##          | ##         | ##          | ##         | ##                  | ##          |                    |             |             |            |            |            |            |          |
| p-value (2-tailed students t-test)                                                      |                              | 1.32E-11                |                             | 2.27E-04            | 8.86E-04    | 4.66E-08   | 2.96E-08    | 2.86E-16   | 1.00E+00            | 2.86E-16    |                    |             |             |            |            |            |            |          |
| Stat. sig. (exp. vs. con embryo) *p<0.05, **p<0.005                                     |                              | **                      |                             | **                  | *           | **         | **          | **         | **                  | **          |                    | *           | *           |            |            |            |            |          |
| p-value (2-tailed students t-test)                                                      |                              | 2.18E-04                | 1.32E-09                    | 1.34E-01            | 1.06E-03    | 5.14E-02   | 1.64E-05    | 6.48E-07   | 2.30E-14            | 1.00E+00    | 2.30E-14           | 1.00E+00    | 1.89E-02    | 1.89E-02   | 1.00E+00   | 2.11E-01   | 1.00E+00   | 2.11E-01 |

| Control siRNA (10 $\mu$ M), 1in2 micro-injection, 32-cell (E3.5) stage |                              |                         |                             |                     |             |             |                     |             |             |
|------------------------------------------------------------------------|------------------------------|-------------------------|-----------------------------|---------------------|-------------|-------------|---------------------|-------------|-------------|
| #                                                                      | Total cell number per embryo | Cells in injected clone | Cells in non-injected clone | INJECTED CLONE      |             |             | NON INJECTED CLONE  |             |             |
|                                                                        |                              |                         |                             | Nuclear abnormality | OUTER CELLS | INNER CELLS | Nuclear abnormality | OUTER CELLS | INNER CELLS |
| 1                                                                      | 38                           | 19                      | 19                          | 0                   | 12          | 7           | 0                   | 12          | 7           |
| 2                                                                      | 31                           | 14                      | 17                          | 0                   | 8           | 6           | 0                   | 8           | 9           |
| 3                                                                      | 35                           | 17                      | 18                          | 0                   | 11          | 6           | 0                   | 12          | 6           |
| 4                                                                      | 37                           | 19                      | 18                          | 0                   | 12          | 7           | 0                   | 12          | 6           |
| 5                                                                      | 31                           | 14                      | 17                          | 0                   | 8           | 6           | 0                   | 8           | 9           |
| 6                                                                      | 32                           | 15                      | 17                          | 0                   | 10          | 5           | 0                   | 10          | 7           |
| 7                                                                      | 32                           | 18                      | 14                          | 0                   | 11          | 7           | 0                   | 9           | 5           |
| 8                                                                      | 36                           | 19                      | 17                          | 0                   | 11          | 8           | 0                   | 11          | 6           |
| 9                                                                      | 31                           | 15                      | 16                          | 0                   | 9           | 6           | 0                   | 9           | 7           |
| 10                                                                     | 34                           | 16                      | 18                          | 0                   | 10          | 6           | 0                   | 10          | 8           |
| 11                                                                     | 37                           | 19                      | 18                          | 0                   | 11          | 8           | 0                   | 11          | 7           |
| 12                                                                     | 31                           | 13                      | 18                          | 0                   | 10          | 3           | 0                   | 12          | 6           |
| 13                                                                     | 39                           | 20                      | 19                          | 0                   | 13          | 7           | 0                   | 12          | 7           |
| 14                                                                     | 35                           | 17                      | 18                          | 0                   | 11          | 6           | 0                   | 11          | 7           |
| 15                                                                     | 35                           | 17                      | 18                          | 0                   | 11          | 6           | 0                   | 12          | 6           |
| <b>TOTAL</b>                                                           | <b>514</b>                   | <b>252</b>              | <b>262</b>                  | <b>0</b>            | <b>158</b>  | <b>94</b>   | <b>0</b>            | <b>159</b>  | <b>103</b>  |
| <b>AVERAGE</b>                                                         | <b>34.3</b>                  | <b>16.8</b>             | <b>17.5</b>                 | <b>0.0</b>          | <b>10.5</b> | <b>6.3</b>  | <b>0.0</b>          | <b>10.6</b> | <b>6.9</b>  |
| <b>SEM</b>                                                             | <b>0.7</b>                   | <b>0.6</b>              | <b>0.3</b>                  | <b>0.0</b>          | <b>0.4</b>  | <b>0.3</b>  | <b>0.0</b>          | <b>0.4</b>  | <b>0.3</b>  |
| Stat. sig. (inter-clone) †p<0.05, ††p<0.005                            |                              |                         |                             |                     |             |             |                     |             |             |
| p-value (2-tailed students t-test)                                     |                              | 3.18E-01                |                             | 1.00E+00            | 9.01E-01    | 1.73E-01    |                     |             |             |

| Wwc2-specific siRNA (10 $\mu$ M), 1in2 micro-injection, 32-cell (E3.5) stage |                              |                         |                             |                     |             |             |                     |             |             |
|------------------------------------------------------------------------------|------------------------------|-------------------------|-----------------------------|---------------------|-------------|-------------|---------------------|-------------|-------------|
| #                                                                            | Total cell number per embryo | Cells in injected clone | Cells in non-injected clone | INJECTED CLONE      |             |             | NON INJECTED CLONE  |             |             |
|                                                                              |                              |                         |                             | Nuclear abnormality | OUTER CELLS | INNER CELLS | Nuclear abnormality | OUTER CELLS | INNER CELLS |
| 1                                                                            | 38                           | 16                      | 22                          | 2                   | 12          | 4           | 0                   | 15          | 7           |
| 2                                                                            | 33                           | 13                      | 20                          | 1                   | 11          | 2           | 0                   | 12          | 8           |
| 3                                                                            | 28                           | 11                      | 17                          | 0                   | 9           | 2           | 0                   | 11          | 6           |
| 4                                                                            | 33                           | 14                      | 19                          | 3                   | 11          | 3           | 0                   | 12          | 7           |
| 5                                                                            | 38                           | 16                      | 22                          | 0                   | 12          | 4           | 0                   | 13          | 9           |
| 6                                                                            | 29                           | 11                      | 18                          | 1                   | 11          | 0           | 0                   | 11          | 7           |
| 7                                                                            | 28                           | 13                      | 15                          | 0                   | 10          | 3           | 0                   | 10          | 5           |
| 8                                                                            | 28                           | 11                      | 17                          | 1                   | 8           | 3           | 0                   | 11          | 6           |
| 9                                                                            | 29                           | 11                      | 18                          | 0                   | 10          | 1           | 0                   | 10          | 8           |
| 10                                                                           | 25                           | 9                       | 16                          | 2                   | 9           | 0           | 0                   | 11          | 5           |
| 11                                                                           | 32                           | 14                      | 18                          | 1                   | 12          | 2           | 0                   | 11          | 7           |
| 12                                                                           | 32                           | 13                      | 19                          | 1                   | 10          | 3           | 0                   | 13          | 6           |
| 13                                                                           | 30                           | 11                      | 19                          | 0                   | 10          | 1           | 0                   | 12          | 7           |
| 14                                                                           | 40                           | 16                      | 24                          | 2                   | 12          | 4           | 0                   | 16          | 8           |
| 15                                                                           | 31                           | 13                      | 18                          | 0                   | 12          | 1           | 0                   | 12          | 6           |
| 16                                                                           | 39                           | 17                      | 22                          | 1                   | 14          | 3           | 0                   | 14          | 8           |
| 17                                                                           | 31                           | 12                      | 19                          | 0                   | 12          | 0           | 0                   | 12          | 7           |
| 18                                                                           | 34                           | 13                      | 21                          | 1                   | 9           | 4           | 0                   | 14          | 7           |
| 19                                                                           | 28                           | 10                      | 18                          | 1                   | 9           | 1           | 0                   | 12          | 6           |
| <b>TOTAL</b>                                                                 | <b>606</b>                   | <b>244</b>              | <b>362</b>                  | <b>17</b>           | <b>203</b>  | <b>41</b>   | <b>0</b>            | <b>232</b>  | <b>130</b>  |
| <b>AVERAGE</b>                                                               | <b>31.9</b>                  | <b>12.8</b>             | <b>19.1</b>                 | <b>0.9</b>          | <b>10.7</b> | <b>2.2</b>  | <b>0.0</b>          | <b>12.2</b> | <b>6.8</b>  |
| <b>SEM</b>                                                                   | <b>1.0</b>                   | <b>0.5</b>              | <b>0.5</b>                  | <b>0.2</b>          | <b>0.4</b>  | <b>0.3</b>  | <b>0.0</b>          | <b>0.4</b>  | <b>0.2</b>  |
| Stat. sig. (inter-clone) †p<0.05, ††p<0.005                                  |                              | ††                      |                             | ††                  | †           | ††          |                     |             |             |
| p-value (2-tailed students t-test)                                           |                              | 4.78E-10                |                             | 7.81E-05            | 5.04E-03    | 1.41E-13    |                     |             |             |
| Stat. sig. (exp. vs. con embryo) *p<0.05, **p<0.005                          |                              | **                      | *                           | **                  | **          | **          |                     | *           |             |
| p-value (2-tailed students t-test)                                           | 7.23E-02                     | 1.32E-05                | 2.21E-02                    | 4.07E-04            | 7.69E-01    | 3.84E-10    | 1.00E+00            | 5.58E-03    | 9.49E-01    |

| Wwc2-specific siRNA (10 $\mu$ M) +HA-Wwc2 (siRNA resistant) mRNA (80ng/ $\mu$ L), 1in2 micro-injection, 32-cell (E3.5) stage |                              |                         |                             |                     |             |             |                     |             |             |
|------------------------------------------------------------------------------------------------------------------------------|------------------------------|-------------------------|-----------------------------|---------------------|-------------|-------------|---------------------|-------------|-------------|
| #                                                                                                                            | Total cell number per embryo | Cells in injected clone | Cells in non-injected clone | INJECTED CLONE      |             |             | NON INJECTED CLONE  |             |             |
|                                                                                                                              |                              |                         |                             | Nuclear abnormality | OUTER CELLS | INNER CELLS | Nuclear abnormality | OUTER CELLS | INNER CELLS |
| 1                                                                                                                            | 35                           | 18                      | 17                          | 0                   | 12          | 6           | 0                   | 10          | 7           |
| 2                                                                                                                            | 32                           | 16                      | 16                          | 0                   | 10          | 6           | 0                   | 11          | 5           |
| 3                                                                                                                            | 32                           | 17                      | 15                          | 0                   | 10          | 7           | 0                   | 9           | 6           |
| 4                                                                                                                            | 33                           | 16                      | 17                          | 1                   | 12          | 4           | 0                   | 9           | 8           |
| 5                                                                                                                            | 35                           | 18                      | 17                          | 0                   | 11          | 7           | 0                   | 10          | 7           |
| 6                                                                                                                            | 32                           | 15                      | 17                          | 0                   | 11          | 4           | 0                   | 8           | 9           |
| 7                                                                                                                            | 37                           | 18                      | 19                          | 0                   | 10          | 8           | 0                   | 15          | 4           |
| 8                                                                                                                            | 29                           | 14                      | 15                          | 0                   | 9           | 5           | 0                   | 11          | 4           |
| 9                                                                                                                            | 33                           | 16                      | 17                          | 1                   | 11          | 5           | 0                   | 10          | 7           |
| 10                                                                                                                           | 32                           | 17                      | 15                          | 0                   | 10          | 7           | 0                   | 9           | 6           |
| 11                                                                                                                           | 37                           | 20                      | 17                          | 0                   | 12          | 8           | 0                   | 11          | 6           |
| 12                                                                                                                           | 33                           | 16                      | 17                          | 0                   | 10          | 6           | 0                   | 11          | 6           |
| 13                                                                                                                           | 34                           | 17                      | 17                          | 0                   | 11          | 6           | 0                   | 9           | 8           |
| 14                                                                                                                           | 42                           | 21                      | 21                          | 0                   | 13          | 8           | 0                   | 14          | 7           |
| 15                                                                                                                           | 32                           | 16                      | 16                          | 0                   | 10          | 6           | 0                   | 11          | 5           |
| 16                                                                                                                           | 39                           | 19                      | 20                          | 0                   | 13          | 6           | 0                   | 12          | 8           |
| 17                                                                                                                           | 30                           | 14                      | 16                          | 1                   | 9           | 5           | 0                   | 9           | 7           |
| 18                                                                                                                           | 37                           | 19                      | 18                          | 0                   | 12          | 7           | 0                   | 11          | 7           |
| 19                                                                                                                           | 37                           | 18                      | 19                          | 0                   | 11          | 7           | 0                   | 13          | 6           |
| 20                                                                                                                           | 35                           | 17                      | 18                          | 0                   | 10          | 7           | 0                   | 12          | 6           |
| 21                                                                                                                           | 36                           | 17                      | 19                          | 0                   | 11          | 6           | 0                   | 12          | 7           |
| 22                                                                                                                           | 36                           | 19                      | 17                          | 0                   | 13          | 6           | 0                   | 11          | 6           |
| <b>TOTAL</b>                                                                                                                 | <b>758</b>                   | <b>378</b>              | <b>380</b>                  | <b>3</b>            | <b>241</b>  | <b>137</b>  | <b>0</b>            | <b>238</b>  | <b>142</b>  |
| <b>AVERAGE</b>                                                                                                               | <b>34.5</b>                  | <b>17.2</b>             | <b>17.3</b>                 | <b>0.1</b>          | <b>11.0</b> | <b>6.2</b>  | <b>0.0</b>          | <b>10.8</b> | <b>6.5</b>  |
| <b>SEM</b>                                                                                                                   | <b>0.7</b>                   | <b>0.4</b>              | <b>0.3</b>                  | <b>0.1</b>          | <b>0.3</b>  | <b>0.2</b>  | <b>0.0</b>          | <b>0.4</b>  | <b>0.3</b>  |
| Stat. sig. (inter-clone) †p<0.05, ††p<0.005                                                                                  |                              |                         |                             |                     |             |             |                     |             |             |
| p-value (2-tailed students t-test)                                                                                           |                              | 8.59E-01                |                             | 7.57E-02            | 7.64E-01    | 5.36E-01    |                     |             |             |
| Stat. sig. (exp. vs. con embryo) *p<0.05, **p<0.005                                                                          |                              |                         |                             |                     |             |             |                     |             |             |
| p-value (2-tailed students t-test)                                                                                           | 8.50E-01                     | 5.66E-01                | 6.93E-01                    | 1.43E-01            | 3.38E-01    | 9.21E-01    | 1.00E+00            | 6.95E-01    | 3.16E-01    |
| Stat. sig. (exp. vs. exp/KD embryo) §p<0.05, §§p<0.005                                                                       | §                            | §§                      | §§                          | §§                  | §§          | §§          |                     | §           |             |
| p-value (2-tailed students t-test)                                                                                           | 3.15E-02                     | 3.05E-08                | 5.73E-03                    | 5.97E-04            | 5.32E-01    | 1.86E-12    | 1.00E+00            | 1.18E-02    | 2.99E-01    |



| Control siRNA (10 $\mu$ M), 1in2 micro-injection, >64-cell (E4.5) stage |                              |                         |                             |                     |             |             |                     |             |             |
|-------------------------------------------------------------------------|------------------------------|-------------------------|-----------------------------|---------------------|-------------|-------------|---------------------|-------------|-------------|
| #                                                                       | Total cell number per embryo | Cells in injected clone | Cells in non-injected clone | INJECTED CLONE      |             |             | NON INJECTED CLONE  |             |             |
|                                                                         |                              |                         |                             | Nuclear abnormality | OUTER CELLS | INNER CELLS | Nuclear abnormality | OUTER CELLS | INNER CELLS |
| 1                                                                       | 74                           | 36                      | 38                          | 0                   | 26          | 10          | 0                   | 29          | 9           |
| 2                                                                       | 72                           | 34                      | 38                          | 0                   | 25          | 9           | 0                   | 28          | 10          |
| 3                                                                       | 76                           | 39                      | 37                          | 0                   | 29          | 10          | 0                   | 28          | 9           |
| 4                                                                       | 79                           | 39                      | 40                          | 0                   | 28          | 11          | 0                   | 30          | 10          |
| 5                                                                       | 73                           | 36                      | 37                          | 0                   | 27          | 9           | 0                   | 29          | 8           |
| 6                                                                       | 80                           | 39                      | 41                          | 0                   | 29          | 10          | 0                   | 32          | 9           |
| 7                                                                       | 73                           | 36                      | 37                          | 0                   | 28          | 8           | 0                   | 28          | 9           |
| 8                                                                       | 79                           | 40                      | 39                          | 0                   | 28          | 12          | 0                   | 29          | 10          |
| 9                                                                       | 78                           | 40                      | 38                          | 0                   | 31          | 9           | 0                   | 26          | 12          |
| 10                                                                      | 82                           | 42                      | 40                          | 0                   | 31          | 11          | 0                   | 30          | 10          |
| 11                                                                      | 78                           | 38                      | 40                          | 0                   | 28          | 10          | 0                   | 28          | 12          |
| 12                                                                      | 81                           | 41                      | 40                          | 0                   | 30          | 11          | 0                   | 31          | 9           |
| 13                                                                      | 74                           | 37                      | 37                          | 0                   | 29          | 8           | 0                   | 30          | 7           |
| <b>TOTAL</b>                                                            | <b>999</b>                   | <b>497</b>              | <b>502</b>                  | <b>0</b>            | <b>369</b>  | <b>128</b>  | <b>0</b>            | <b>378</b>  | <b>124</b>  |
| <b>AVERAGE</b>                                                          | <b>76.8</b>                  | <b>38.2</b>             | <b>38.6</b>                 | <b>0.0</b>          | <b>28.4</b> | <b>9.8</b>  | <b>0.0</b>          | <b>29.1</b> | <b>9.5</b>  |
| <b>SEM</b>                                                              | <b>0.9</b>                   | <b>0.6</b>              | <b>0.4</b>                  | <b>0.0</b>          | <b>0.5</b>  | <b>0.3</b>  | <b>0.0</b>          | <b>0.4</b>  | <b>0.4</b>  |
| Stat. sig. (inter-clone) †p<0.05, ††p<0.005                             |                              |                         |                             |                     |             |             |                     |             |             |
| p-value (2-tailed students t-test)                                      |                              | 6.16E-01                |                             | 1.00E+00            | 2.98E-01    | 5.54E-01    |                     |             |             |

| Wwc2-specific siRNA (10 $\mu$ M), 1in2 micro-injection, >64-cell (E4.5) stage |                              |                         |                             |                     |             |             |                     |             |             |
|-------------------------------------------------------------------------------|------------------------------|-------------------------|-----------------------------|---------------------|-------------|-------------|---------------------|-------------|-------------|
| #                                                                             | Total cell number per embryo | Cells in injected clone | Cells in non-injected clone | INJECTED CLONE      |             |             | NON INJECTED CLONE  |             |             |
|                                                                               |                              |                         |                             | Nuclear abnormality | OUTER CELLS | INNER CELLS | Nuclear abnormality | OUTER CELLS | INNER CELLS |
| 1                                                                             | 54                           | 18                      | 36                          | 2                   | 17          | 1           | 0                   | 27          | 9           |
| 2                                                                             | 64                           | 23                      | 41                          | 1                   | 21          | 2           | 0                   | 30          | 11          |
| 3                                                                             | 73                           | 26                      | 47                          | 2                   | 24          | 2           | 0                   | 35          | 12          |
| 4                                                                             | 57                           | 19                      | 38                          | 1                   | 19          | 0           | 0                   | 28          | 10          |
| 5                                                                             | 57                           | 21                      | 36                          | 1                   | 20          | 1           | 0                   | 27          | 9           |
| 6                                                                             | 68                           | 27                      | 41                          | 3                   | 25          | 2           | 0                   | 30          | 11          |
| 7                                                                             | 66                           | 25                      | 41                          | 0                   | 24          | 1           | 0                   | 31          | 10          |
| 8                                                                             | 54                           | 18                      | 36                          | 2                   | 18          | 0           | 0                   | 28          | 8           |
| 9                                                                             | 61                           | 21                      | 40                          | 0                   | 19          | 2           | 0                   | 29          | 11          |
| 10                                                                            | 60                           | 23                      | 37                          | 2                   | 22          | 1           | 0                   | 27          | 10          |
| 11                                                                            | 72                           | 29                      | 43                          | 4                   | 26          | 3           | 0                   | 36          | 7           |
| 12                                                                            | 64                           | 21                      | 43                          | 1                   | 21          | 0           | 0                   | 33          | 10          |
| 13                                                                            | 68                           | 25                      | 43                          | 2                   | 23          | 2           | 0                   | 31          | 12          |
| <b>TOTAL</b>                                                                  | <b>818</b>                   | <b>296</b>              | <b>522</b>                  | <b>21</b>           | <b>279</b>  | <b>17</b>   | <b>0</b>            | <b>392</b>  | <b>130</b>  |
| <b>AVERAGE</b>                                                                | <b>62.9</b>                  | <b>22.8</b>             | <b>40.2</b>                 | <b>1.6</b>          | <b>21.5</b> | <b>1.3</b>  | <b>0.0</b>          | <b>30.2</b> | <b>10.0</b> |
| <b>SEM</b>                                                                    | <b>1.8</b>                   | <b>1.0</b>              | <b>0.9</b>                  | <b>0.3</b>          | <b>0.8</b>  | <b>0.3</b>  | <b>0.0</b>          | <b>0.8</b>  | <b>0.4</b>  |
| Stat. sig. (inter-clone) †p<0.05, ††p<0.005                                   |                              | ††                      |                             | ††                  | ††          | ††          |                     |             |             |
| p-value (2-tailed students t-test)                                            |                              | 3.04E-12                |                             | 2.53E-05            | 7.36E-08    | 2.17E-15    |                     |             |             |
| Stat. sig. (exp. vs. con embryo) *p<0.05, **p<0.005                           | **                           | **                      |                             | **                  | **          | **          |                     |             |             |
| p-value (2-tailed students t-test)                                            | 3.40E-07                     | 1.43E-12                | 1.47E-01                    | 2.53E-05            | 9.32E-08    | 1.81E-16    | 1.00E+00            | 2.61E-01    | 4.19E-01    |

| Wwc2-specific siRNA (10 $\mu$ M) +HA-Wwc2 (siRNA resistant) mRNA (80ng/ $\mu$ L), 1in2 micro-injection, >64-cell (E4.5) stage |                              |                         |                             |                     |             |             |                     |             |             |
|-------------------------------------------------------------------------------------------------------------------------------|------------------------------|-------------------------|-----------------------------|---------------------|-------------|-------------|---------------------|-------------|-------------|
| #                                                                                                                             | Total cell number per embryo | Cells in injected clone | Cells in non-injected clone | INJECTED CLONE      |             |             | NON INJECTED CLONE  |             |             |
|                                                                                                                               |                              |                         |                             | Nuclear abnormality | OUTER CELLS | INNER CELLS | Nuclear abnormality | OUTER CELLS | INNER CELLS |
| 1                                                                                                                             | 57                           | 28                      | 29                          | 1                   | 20          | 8           | 0                   | 22          | 7           |
| 2                                                                                                                             | 83                           | 40                      | 43                          | 0                   | 25          | 15          | 0                   | 36          | 7           |
| 3                                                                                                                             | 60                           | 29                      | 31                          | 0                   | 21          | 8           | 0                   | 23          | 8           |
| 4                                                                                                                             | 83                           | 38                      | 45                          | 1                   | 24          | 14          | 0                   | 35          | 10          |
| 5                                                                                                                             | 79                           | 38                      | 41                          | 0                   | 27          | 11          | 0                   | 32          | 9           |
| 6                                                                                                                             | 71                           | 35                      | 36                          | 0                   | 26          | 9           | 0                   | 29          | 7           |
| 7                                                                                                                             | 89                           | 42                      | 47                          | 0                   | 30          | 12          | 0                   | 37          | 10          |
| 8                                                                                                                             | 65                           | 33                      | 32                          | 0                   | 23          | 10          | 0                   | 24          | 8           |
| 9                                                                                                                             | 55                           | 27                      | 28                          | 1                   | 19          | 8           | 0                   | 22          | 6           |
| 10                                                                                                                            | 80                           | 44                      | 36                          | 0                   | 34          | 10          | 0                   | 28          | 8           |
| 11                                                                                                                            | 71                           | 34                      | 37                          | 0                   | 25          | 9           | 0                   | 27          | 10          |
| 12                                                                                                                            | 82                           | 40                      | 42                          | 0                   | 28          | 12          | 0                   | 34          | 8           |
| 13                                                                                                                            | 75                           | 38                      | 37                          | 0                   | 29          | 9           | 0                   | 30          | 7           |
| 14                                                                                                                            | 74                           | 37                      | 37                          | 0                   | 25          | 12          | 0                   | 27          | 10          |
| 15                                                                                                                            | 79                           | 39                      | 40                          | 0                   | 32          | 7           | 0                   | 31          | 9           |
| 16                                                                                                                            | 74                           | 37                      | 37                          | 0                   | 27          | 10          | 0                   | 30          | 7           |
| 17                                                                                                                            | 69                           | 35                      | 34                          | 0                   | 28          | 7           | 0                   | 25          | 9           |
| 18                                                                                                                            | 76                           | 42                      | 34                          | 0                   | 32          | 10          | 0                   | 26          | 8           |
| <b>TOTAL</b>                                                                                                                  | <b>1322</b>                  | <b>656</b>              | <b>666</b>                  | <b>3</b>            | <b>475</b>  | <b>181</b>  | <b>0</b>            | <b>518</b>  | <b>148</b>  |
| <b>AVERAGE</b>                                                                                                                | <b>73.4</b>                  | <b>36.4</b>             | <b>37.0</b>                 | <b>0.2</b>          | <b>26.4</b> | <b>10.1</b> | <b>0.0</b>          | <b>28.8</b> | <b>8.2</b>  |
| <b>SEM</b>                                                                                                                    | <b>2.2</b>                   | <b>1.1</b>              | <b>1.2</b>                  | <b>0.1</b>          | <b>1.0</b>  | <b>0.5</b>  | <b>0.0</b>          | <b>1.1</b>  | <b>0.3</b>  |
| Stat. sig. (inter-clone) †p<0.05, ††p<0.005                                                                                   |                              |                         |                             |                     |             | ††          |                     |             |             |
| p-value (2-tailed students t-test)                                                                                            |                              | 7.44E-01                |                             | 7.39E-02            | 1.17E-01    | 4.99E-03    |                     |             |             |
| Stat. sig. (exp. vs. con embryo) *p<0.05, **p<0.005                                                                           |                              |                         |                             |                     |             |             |                     |             | *           |
| p-value (2-tailed students t-test)                                                                                            | 2.24E-01                     | 2.28E-01                | 2.94E-01                    | 1.30E-01            | 1.16E-01    | 7.64E-01    | 1.00E+00            | 8.29E-01    | 1.03E-02    |
| Stat. sig. (exp. vs. exp/KD embryo) §p<0.05, §§p<0.005                                                                        | §§                           | §§                      | §§                          | §§                  | §§          | §§          |                     |             | §§          |
| p-value (2-tailed students t-test)                                                                                            | 1.59E-03                     | 1.46E-09                | 7.01E-02                    | 1.86E-05            | 9.12E-04    | 1.06E-13    | 1.00E+00            | 3.65E-01    | 1.14E-03    |

| <b>Control siRNA (10<math>\mu</math>M), 2in2 micro-injection, 32-cell (E3.5) stage</b> |                              |                                 |                                 |             |               |                          |             |               |                          |
|----------------------------------------------------------------------------------------|------------------------------|---------------------------------|---------------------------------|-------------|---------------|--------------------------|-------------|---------------|--------------------------|
| #                                                                                      | Total cell number per embryo | Total midbody number per embryo | Midbodies per total cell number | OUTER CELLS |               |                          | INNER CELLS |               |                          |
|                                                                                        |                              |                                 |                                 | Cell number | OUTER midbody | Midbodies per OUTER cell | Cell number | INNER midbody | Midbodies per INNER cell |
| 1                                                                                      | 33                           | 12                              | 0.36                            | 21          | 9             | 0.43                     | 12          | 3             | 0.25                     |
| 2                                                                                      | 38                           | 7                               | 0.18                            | 24          | 7             | 0.29                     | 14          | 0             | 0.00                     |
| 3                                                                                      | 39                           | 10                              | 0.26                            | 26          | 8             | 0.31                     | 13          | 2             | 0.15                     |
| 4                                                                                      | 43                           | 17                              | 0.40                            | 28          | 11            | 0.39                     | 15          | 6             | 0.40                     |
| 5                                                                                      | 33                           | 14                              | 0.42                            | 23          | 10            | 0.43                     | 10          | 4             | 0.40                     |
| 6                                                                                      | 31                           | 12                              | 0.39                            | 22          | 9             | 0.41                     | 9           | 3             | 0.33                     |
| 7                                                                                      | 41                           | 13                              | 0.32                            | 26          | 8             | 0.31                     | 15          | 5             | 0.33                     |
| 8                                                                                      | 35                           | 13                              | 0.37                            | 24          | 9             | 0.38                     | 11          | 4             | 0.36                     |
| 9                                                                                      | 37                           | 12                              | 0.32                            | 25          | 7             | 0.28                     | 12          | 5             | 0.42                     |
| 10                                                                                     | 33                           | 10                              | 0.30                            | 23          | 8             | 0.35                     | 10          | 2             | 0.20                     |
| 11                                                                                     | 40                           | 8                               | 0.20                            | 26          | 7             | 0.27                     | 14          | 1             | 0.07                     |
| 12                                                                                     | 31                           | 6                               | 0.19                            | 22          | 6             | 0.27                     | 9           | 0             | 0.00                     |
| 13                                                                                     | 34                           | 11                              | 0.32                            | 23          | 8             | 0.35                     | 11          | 3             | 0.27                     |
| 14                                                                                     | 33                           | 14                              | 0.42                            | 23          | 10            | 0.43                     | 10          | 4             | 0.40                     |
| 15                                                                                     | 37                           | 12                              | 0.32                            | 24          | 9             | 0.38                     | 13          | 3             | 0.23                     |
| 16                                                                                     | 36                           | 8                               | 0.22                            | 25          | 6             | 0.24                     | 11          | 2             | 0.18                     |
| 17                                                                                     | 35                           | 10                              | 0.29                            | 24          | 10            | 0.42                     | 11          | 0             | 0.00                     |
| 18                                                                                     | 33                           | 7                               | 0.21                            | 23          | 6             | 0.26                     | 10          | 1             | 0.10                     |
| <b>TOTAL</b>                                                                           | <b>642</b>                   | <b>196</b>                      | <b>5.51</b>                     | <b>432</b>  | <b>148</b>    | <b>6.19</b>              | <b>210</b>  | <b>48</b>     | <b>4.11</b>              |
| <b>AVERAGE</b>                                                                         | <b>35.7</b>                  | <b>10.9</b>                     | <b>0.31</b>                     | <b>24.0</b> | <b>8.2</b>    | <b>0.34</b>              | <b>11.7</b> | <b>2.7</b>    | <b>0.23</b>              |
| <b>SEM</b>                                                                             | <b>0.8</b>                   | <b>0.7</b>                      | <b>0.02</b>                     | <b>0.4</b>  | <b>0.4</b>    | <b>0.02</b>              | <b>0.5</b>  | <b>0.4</b>    | <b>0.03</b>              |

| <b>Wwc2-specific siRNA (10<math>\mu</math>M), 2in2 micro-injection, 32-cell (E3.5) stage</b> |                              |                                 |                                 |             |               |                          |             |               |                          |
|----------------------------------------------------------------------------------------------|------------------------------|---------------------------------|---------------------------------|-------------|---------------|--------------------------|-------------|---------------|--------------------------|
| #                                                                                            | Total cell number per embryo | Total midbody number per embryo | Midbodies per total cell number | OUTER CELLS |               |                          | INNER CELLS |               |                          |
|                                                                                              |                              |                                 |                                 | Cell number | OUTER midbody | Midbodies per OUTER cell | Cell number | INNER midbody | Midbodies per INNER cell |
| 1                                                                                            | 16                           | 2                               | 0.13                            | 14          | 2             | 0.14                     | 2           | 0             | 0.00                     |
| 2                                                                                            | 16                           | 5                               | 0.31                            | 15          | 4             | 0.27                     | 1           | 1             | 1.00                     |
| 3                                                                                            | 13                           | 4                               | 0.31                            | 12          | 4             | 0.33                     | 1           | 0             | 0.00                     |
| 4                                                                                            | 24                           | 5                               | 0.21                            | 19          | 5             | 0.26                     | 5           | 0             | 0.00                     |
| 5                                                                                            | 19                           | 6                               | 0.32                            | 17          | 6             | 0.35                     | 2           | 0             | 0.00                     |
| 6                                                                                            | 18                           | 7                               | 0.39                            | 16          | 7             | 0.44                     | 2           | 0             | 0.00                     |
| 7                                                                                            | 25                           | 5                               | 0.20                            | 20          | 4             | 0.20                     | 5           | 1             | 0.20                     |
| 8                                                                                            | 18                           | 5                               | 0.28                            | 15          | 5             | 0.33                     | 3           | 0             | 0.00                     |
| 9                                                                                            | 9                            | 3                               | 0.33                            | 9           | 3             | 0.33                     | 0           | 0             | 0.00                     |
| 10                                                                                           | 15                           | 5                               | 0.33                            | 14          | 5             | 0.36                     | 1           | 0             | 0.00                     |
| 11                                                                                           | 16                           | 5                               | 0.31                            | 13          | 5             | 0.38                     | 3           | 0             | 0.00                     |
| 12                                                                                           | 15                           | 4                               | 0.27                            | 14          | 4             | 0.29                     | 1           | 0             | 0.00                     |
| 13                                                                                           | 14                           | 4                               | 0.29                            | 12          | 4             | 0.33                     | 2           | 0             | 0.00                     |
| 14                                                                                           | 11                           | 2                               | 0.18                            | 11          | 2             | 0.18                     | 0           | 0             | 0.00                     |
| 15                                                                                           | 17                           | 3                               | 0.18                            | 16          | 3             | 0.19                     | 1           | 0             | 0.00                     |
| 16                                                                                           | 16                           | 4                               | 0.25                            | 15          | 3             | 0.20                     | 1           | 1             | 1.00                     |
| 17                                                                                           | 14                           | 2                               | 0.14                            | 13          | 2             | 0.15                     | 1           | 0             | 0.00                     |
| 18                                                                                           | 14                           | 2                               | 0.14                            | 13          | 2             | 0.15                     | 1           | 0             | 0.00                     |
| <b>TOTAL</b>                                                                                 | <b>290</b>                   | <b>73</b>                       | <b>4.56</b>                     | <b>258</b>  | <b>70</b>     | <b>4.90</b>              | <b>32</b>   | <b>3</b>      | <b>2.20</b>              |
| <b>AVERAGE</b>                                                                               | <b>16.1</b>                  | <b>4.1</b>                      | <b>0.25</b>                     | <b>14.3</b> | <b>3.9</b>    | <b>0.27</b>              | <b>1.8</b>  | <b>0.2</b>    | <b>0.12</b>              |
| <b>SEM</b>                                                                                   | <b>0.9</b>                   | <b>0.3</b>                      | <b>0.02</b>                     | <b>0.6</b>  | <b>0.3</b>    | <b>0.02</b>              | <b>0.3</b>  | <b>0.1</b>    | <b>0.08</b>              |
| Stat. sig. (inter-clone) †p<0.05, ††p<0.005                                                  | ††                           | ††                              |                                 | ††          | ††            | †                        | ††          | ††            |                          |
| p-value (2-tailed students t-test)                                                           | 2.68E-17                     | 2.16E-10                        | 5.29E-02                        | 1.66E-14    | 3.09E-10      | 1.05E-02                 | 1.75E-18    | 2.00E-06      | 2.14E-01                 |
